# Supplementary material for: Highly regio- and stereocontrolled preparation of α-(trifluoromethyl)-β-(phenylthio) enamines by the hydroamination of in situ-synthesized 1-(trifluoromethyl)-2-(phenylthio)ethyne
Source: Royal Society of Chemistry journal article supplement (doi:10.1039/d3ob01473h), 2023-01-01

## Supporting Information

### **Highly regio- and stereocontrolled preparation of $\alpha$ -(trifluoromethyl)- $\beta$ -(phenylthio) enamines by the hydroamination of *in-situ*-synthesized 1-(trifluoromethyl)-2-(phenylthio)ethyne**

Akihiro Koga, Maki Matsuda, Rin Tanaka, Minami Endo, Yasunori Yamada, and Takeshi Hanamoto\*

*Department of Chemistry and Applied Chemistry, Saga University,  
Honjyo-machi 1, Saga 840-8502, Japan*

[hanamoto@cc.saga-u.ac.jp](mailto:hanamoto@cc.saga-u.ac.jp)

**$^1\text{H}$ ,  $^{13}\text{C}$ , and  $^{19}\text{F}$ -NMR spectra for compound 3a – 3d, 4a – 4j, 5: S2 – S46**

**2D  $^1\text{H}$ - $^{19}\text{F}$  HOEZY NMR spectra for compound 3a S47, S48**

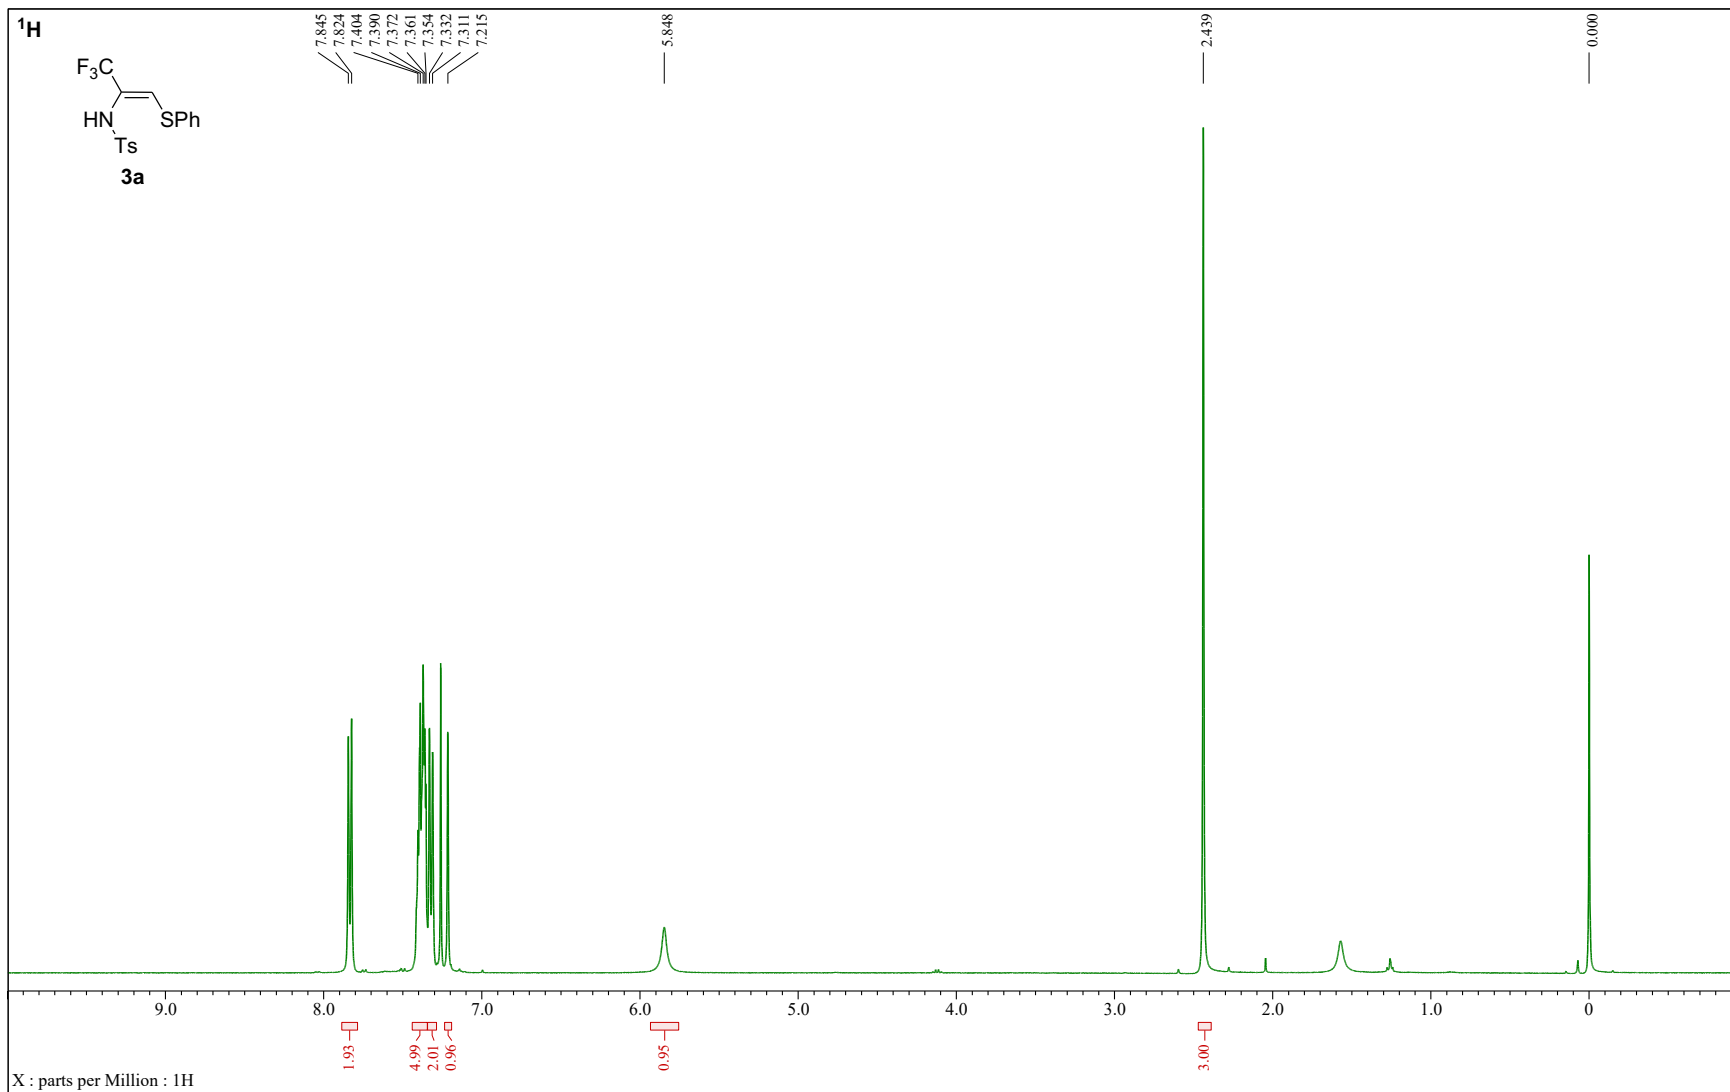

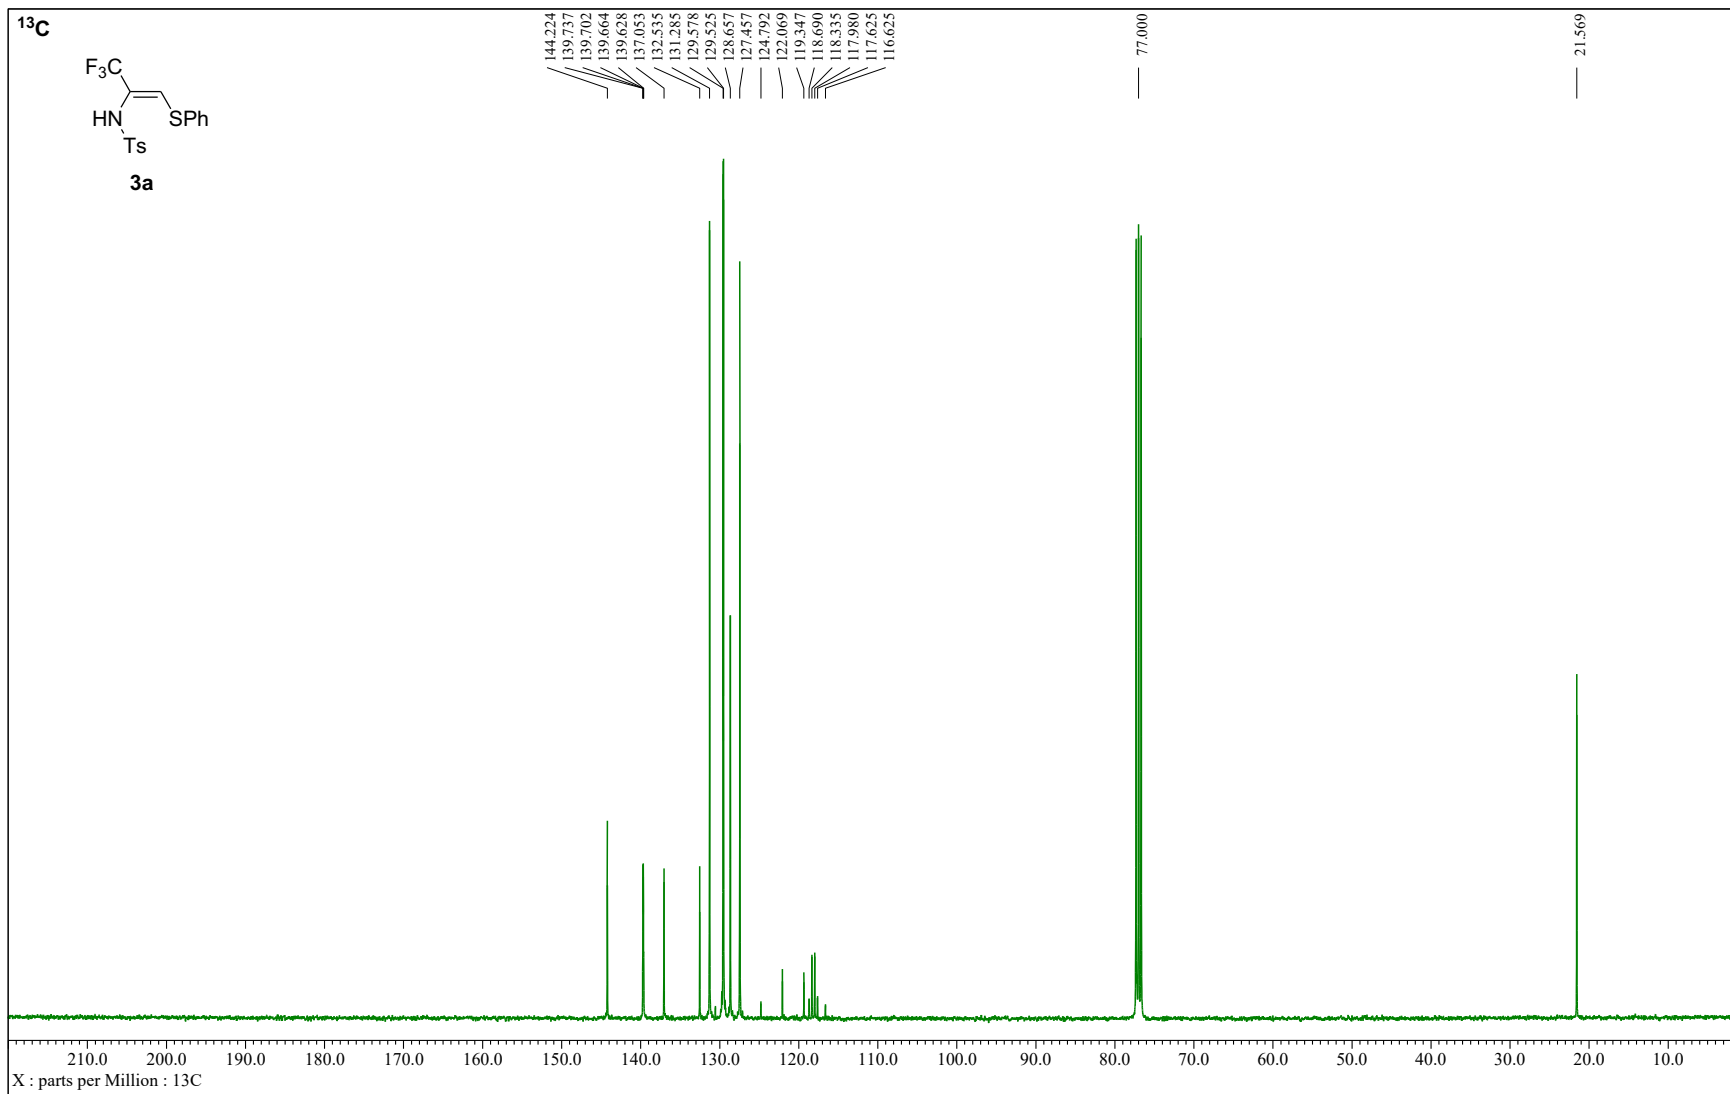

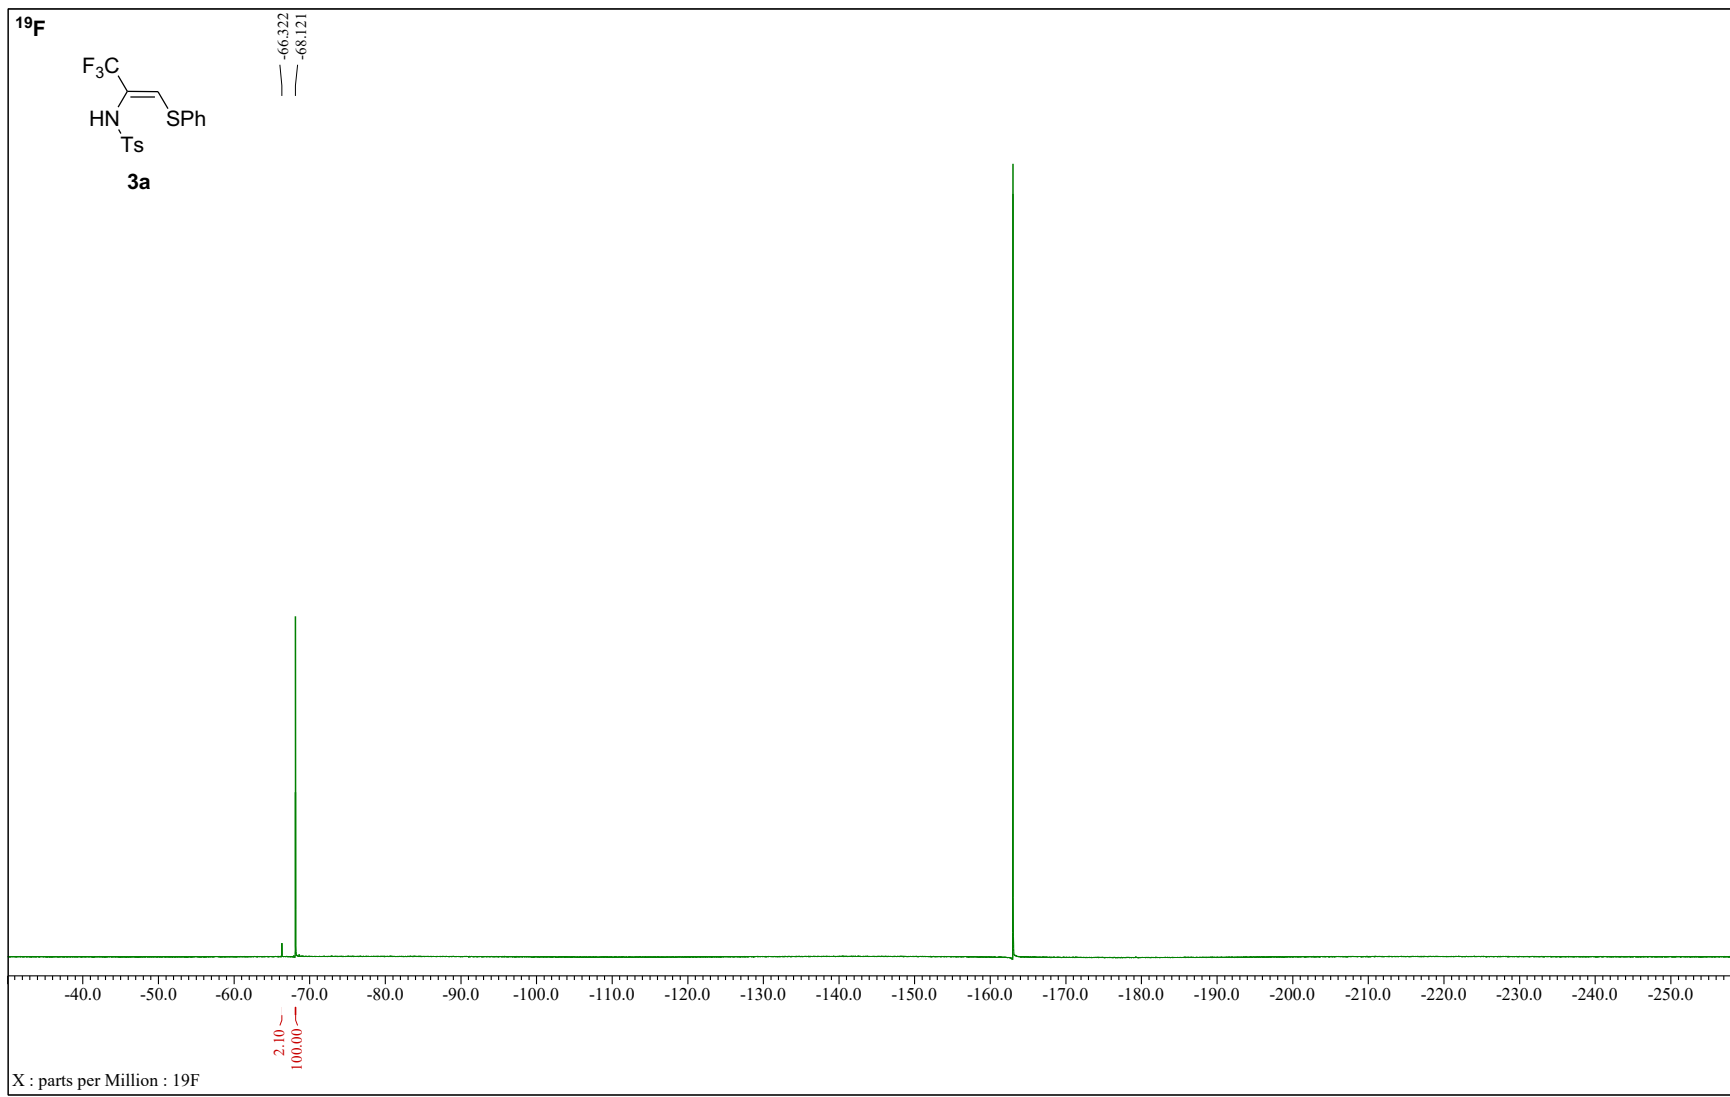

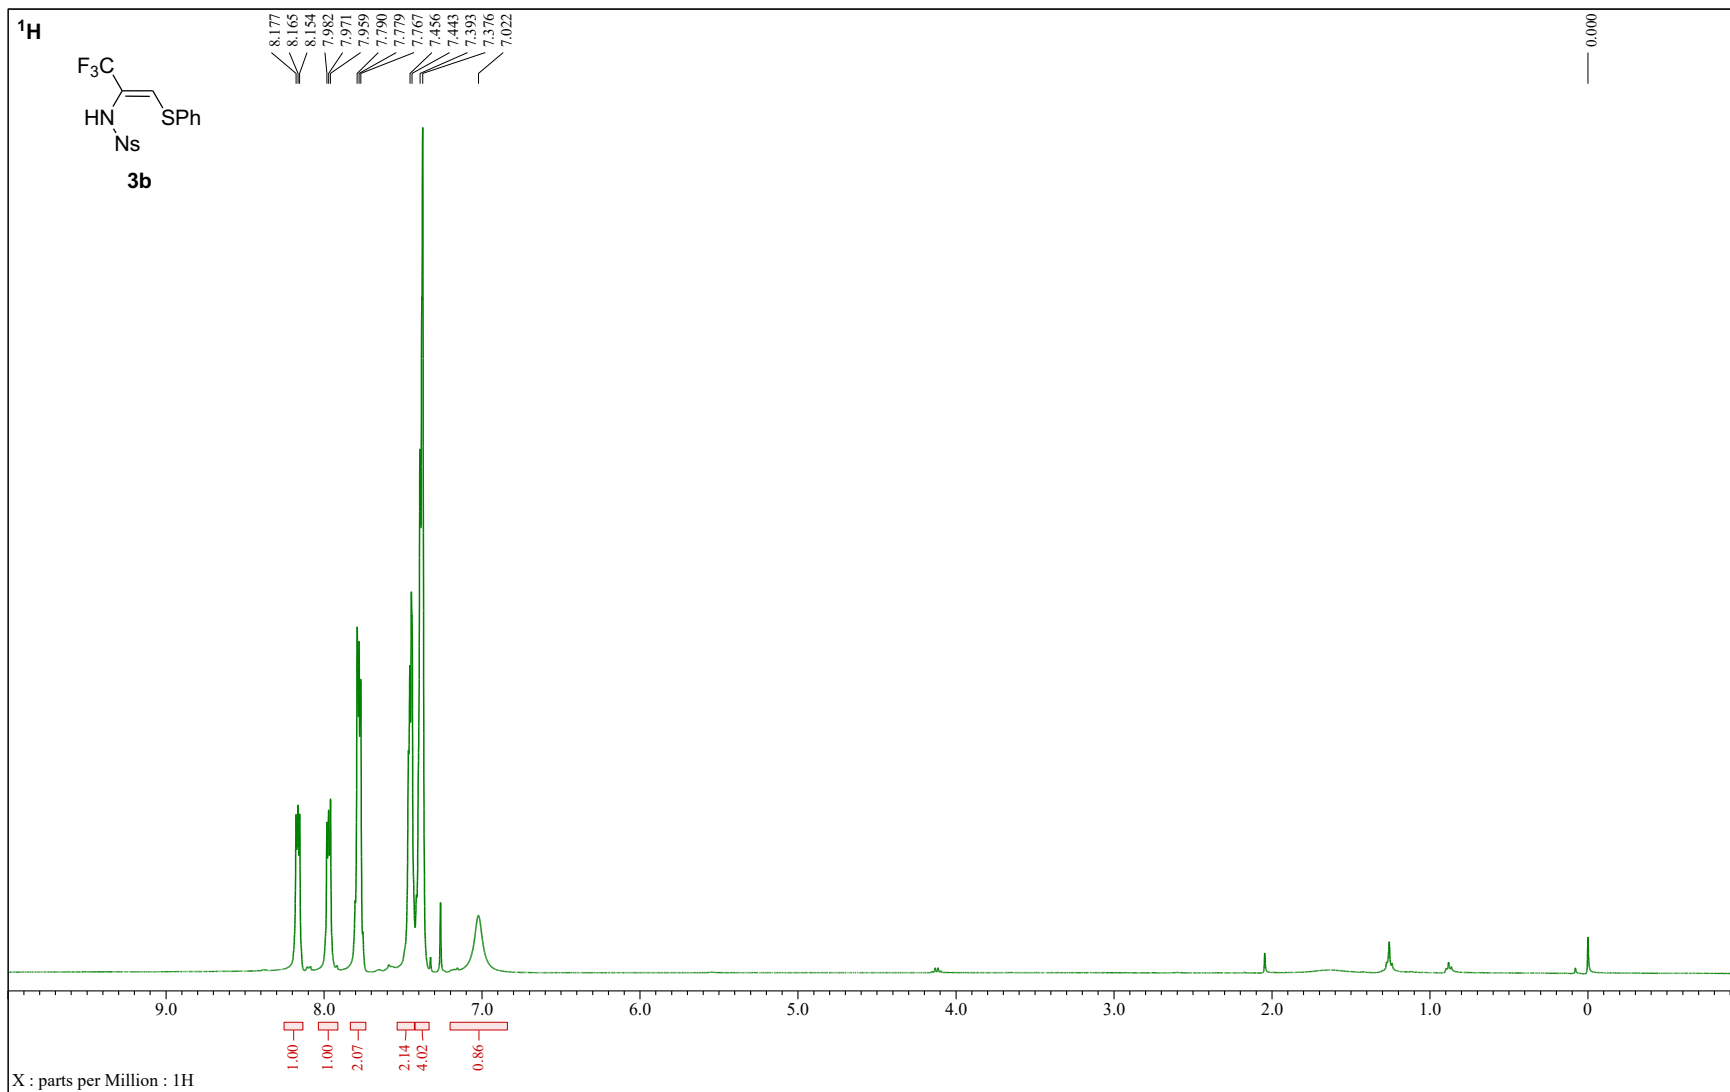

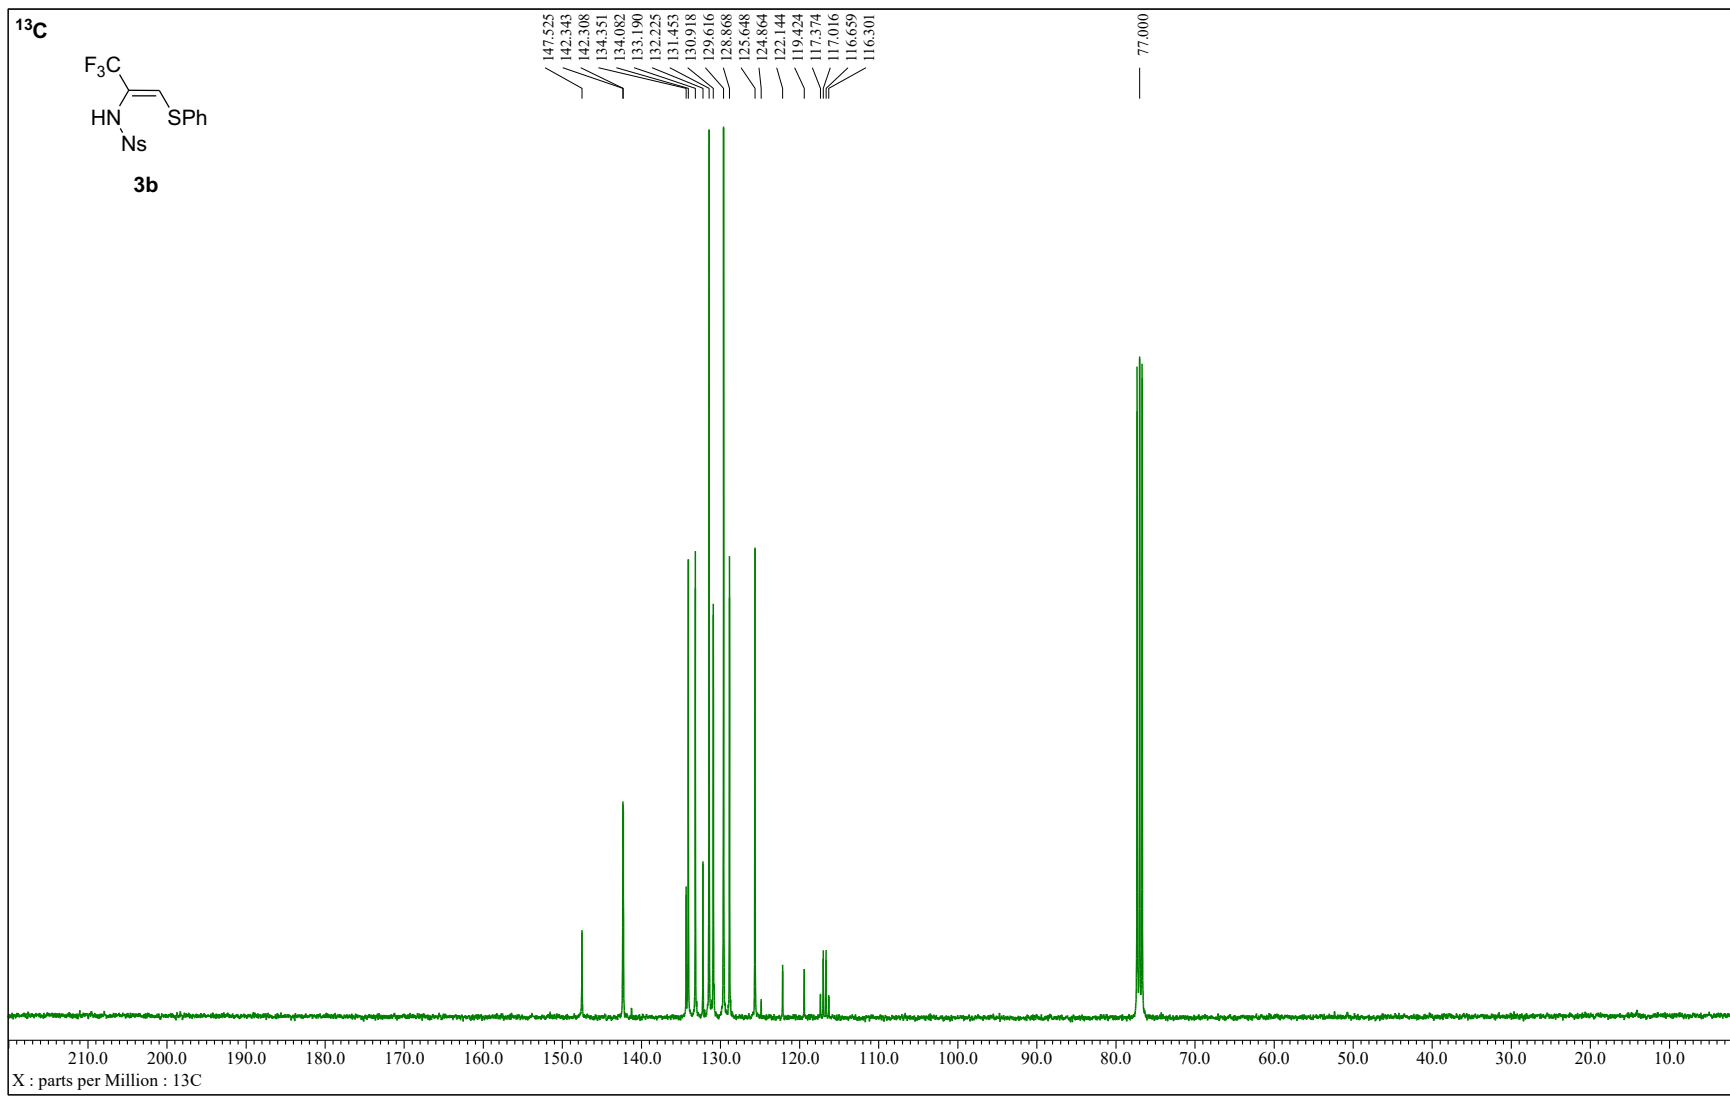

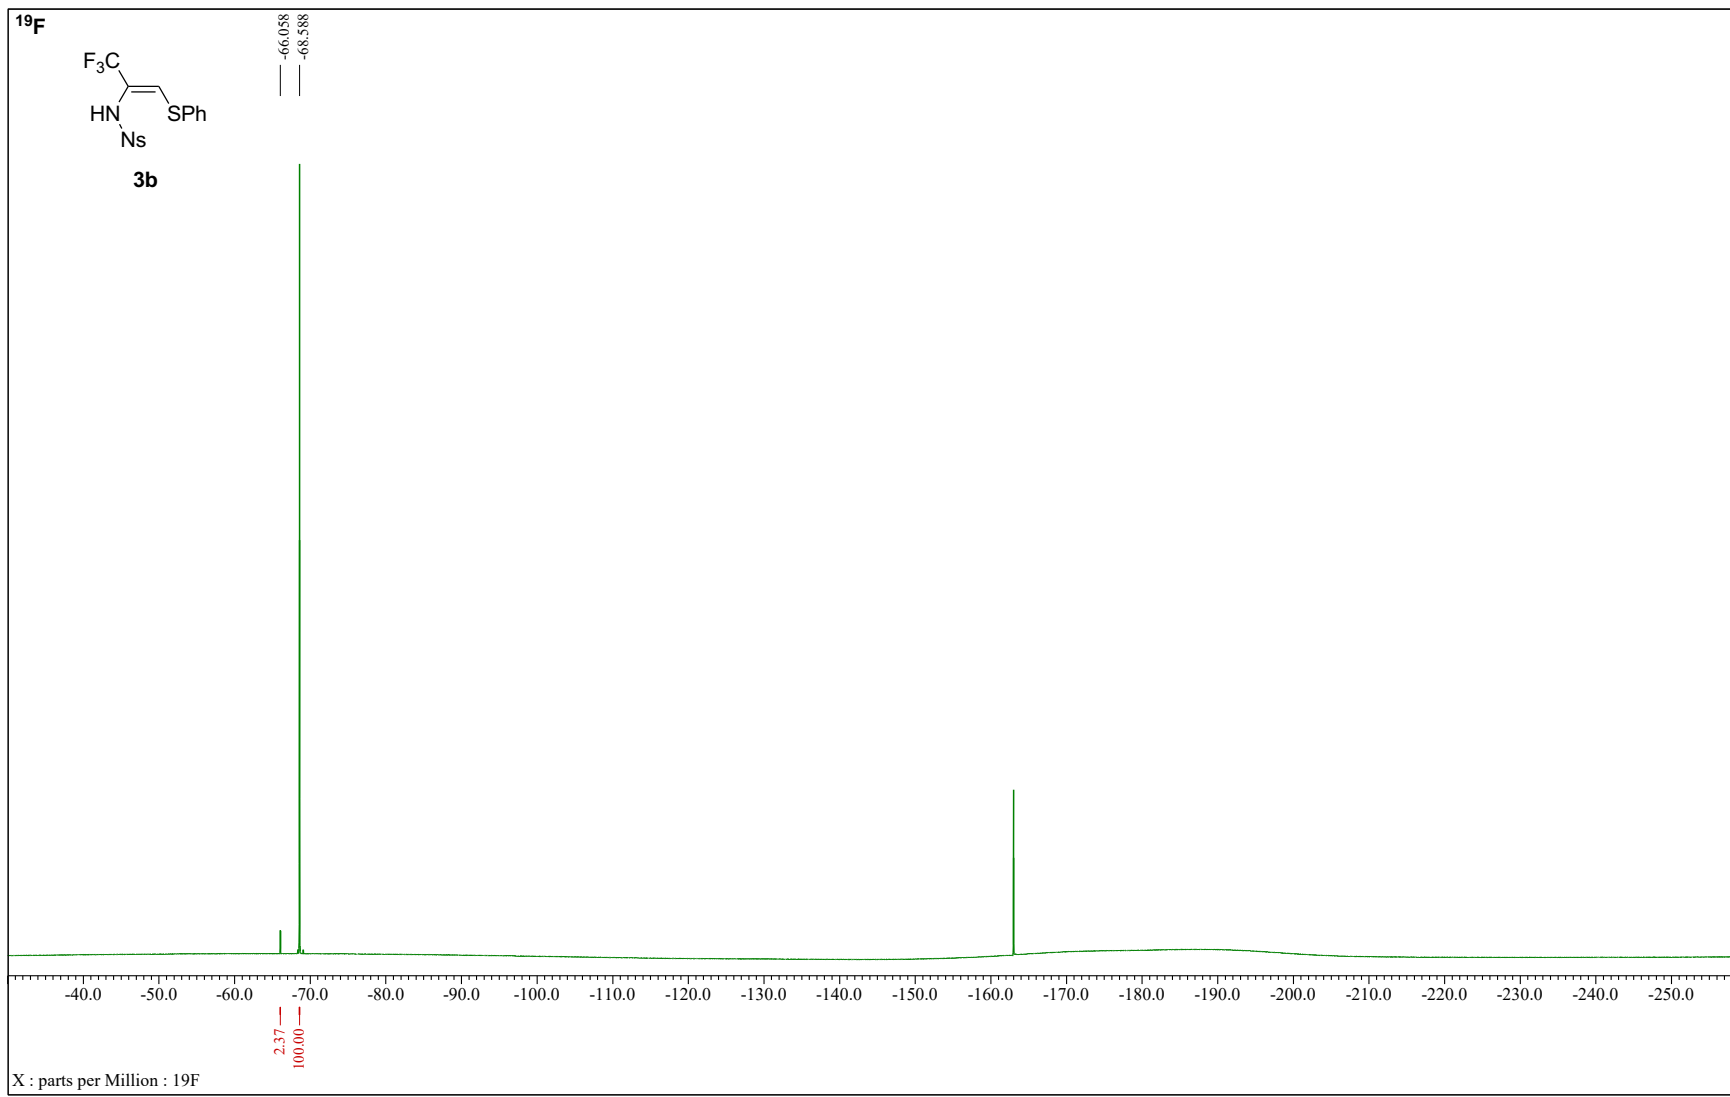

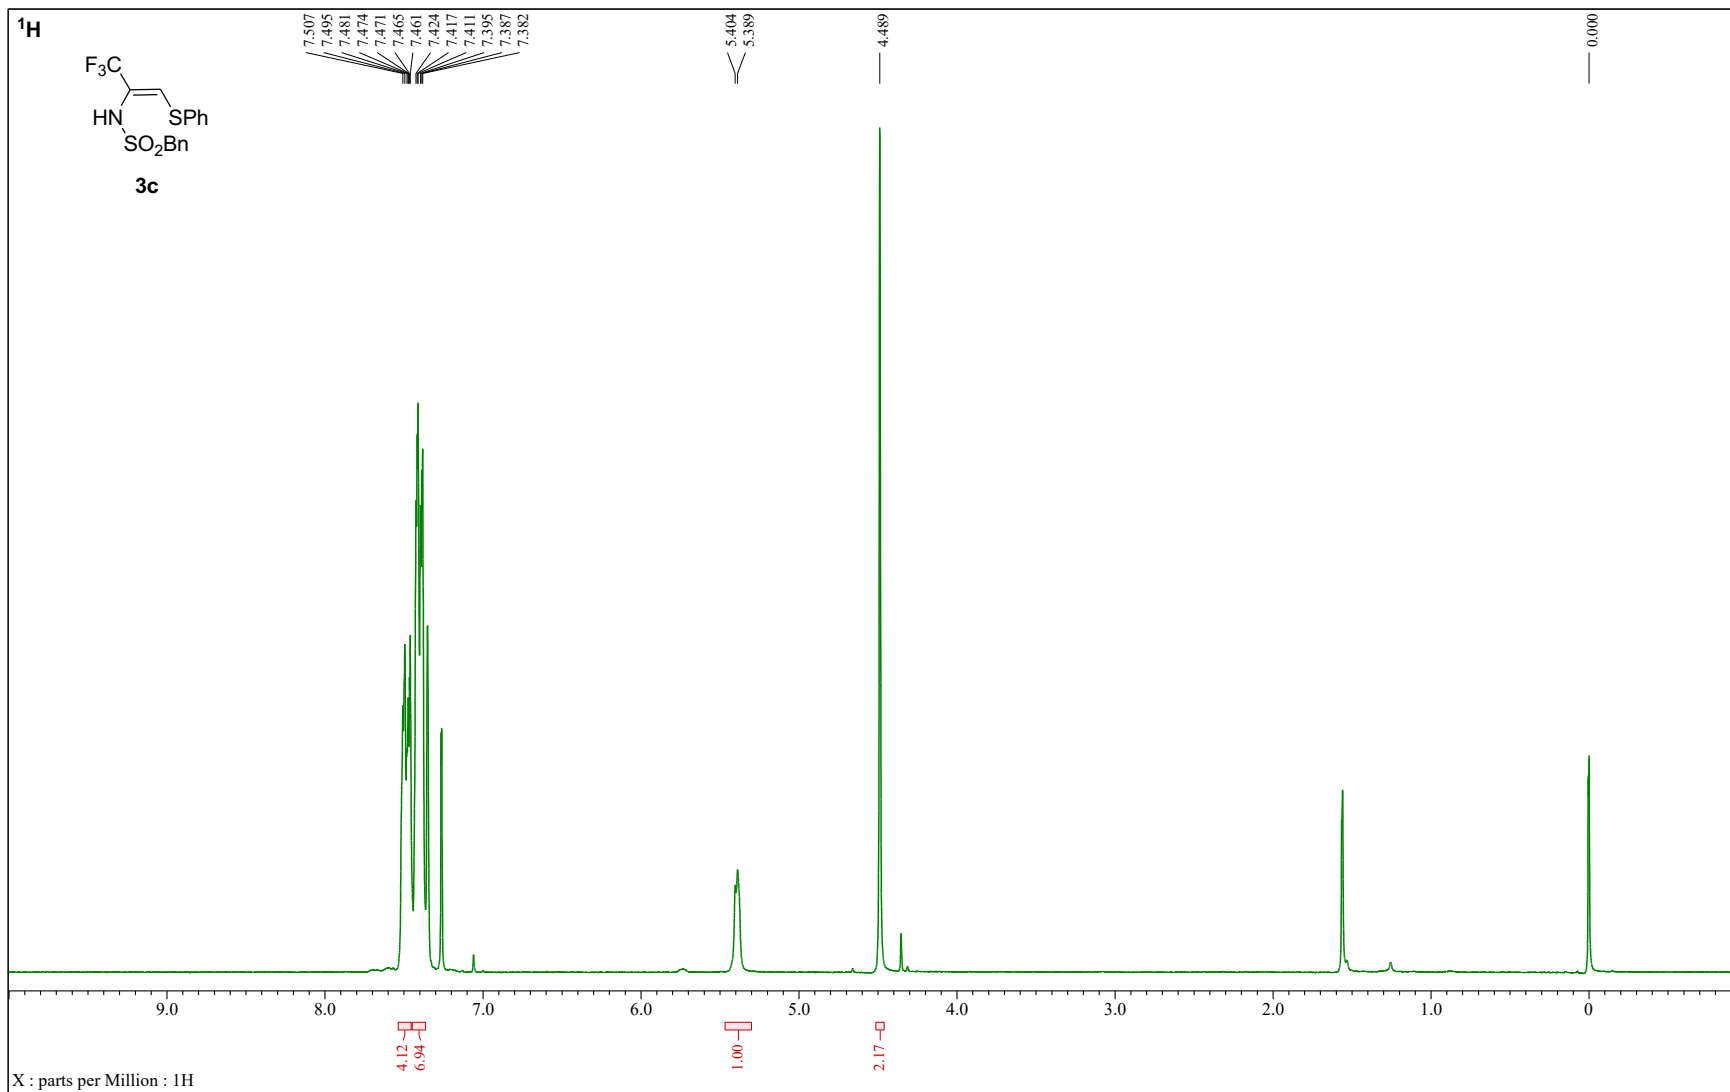



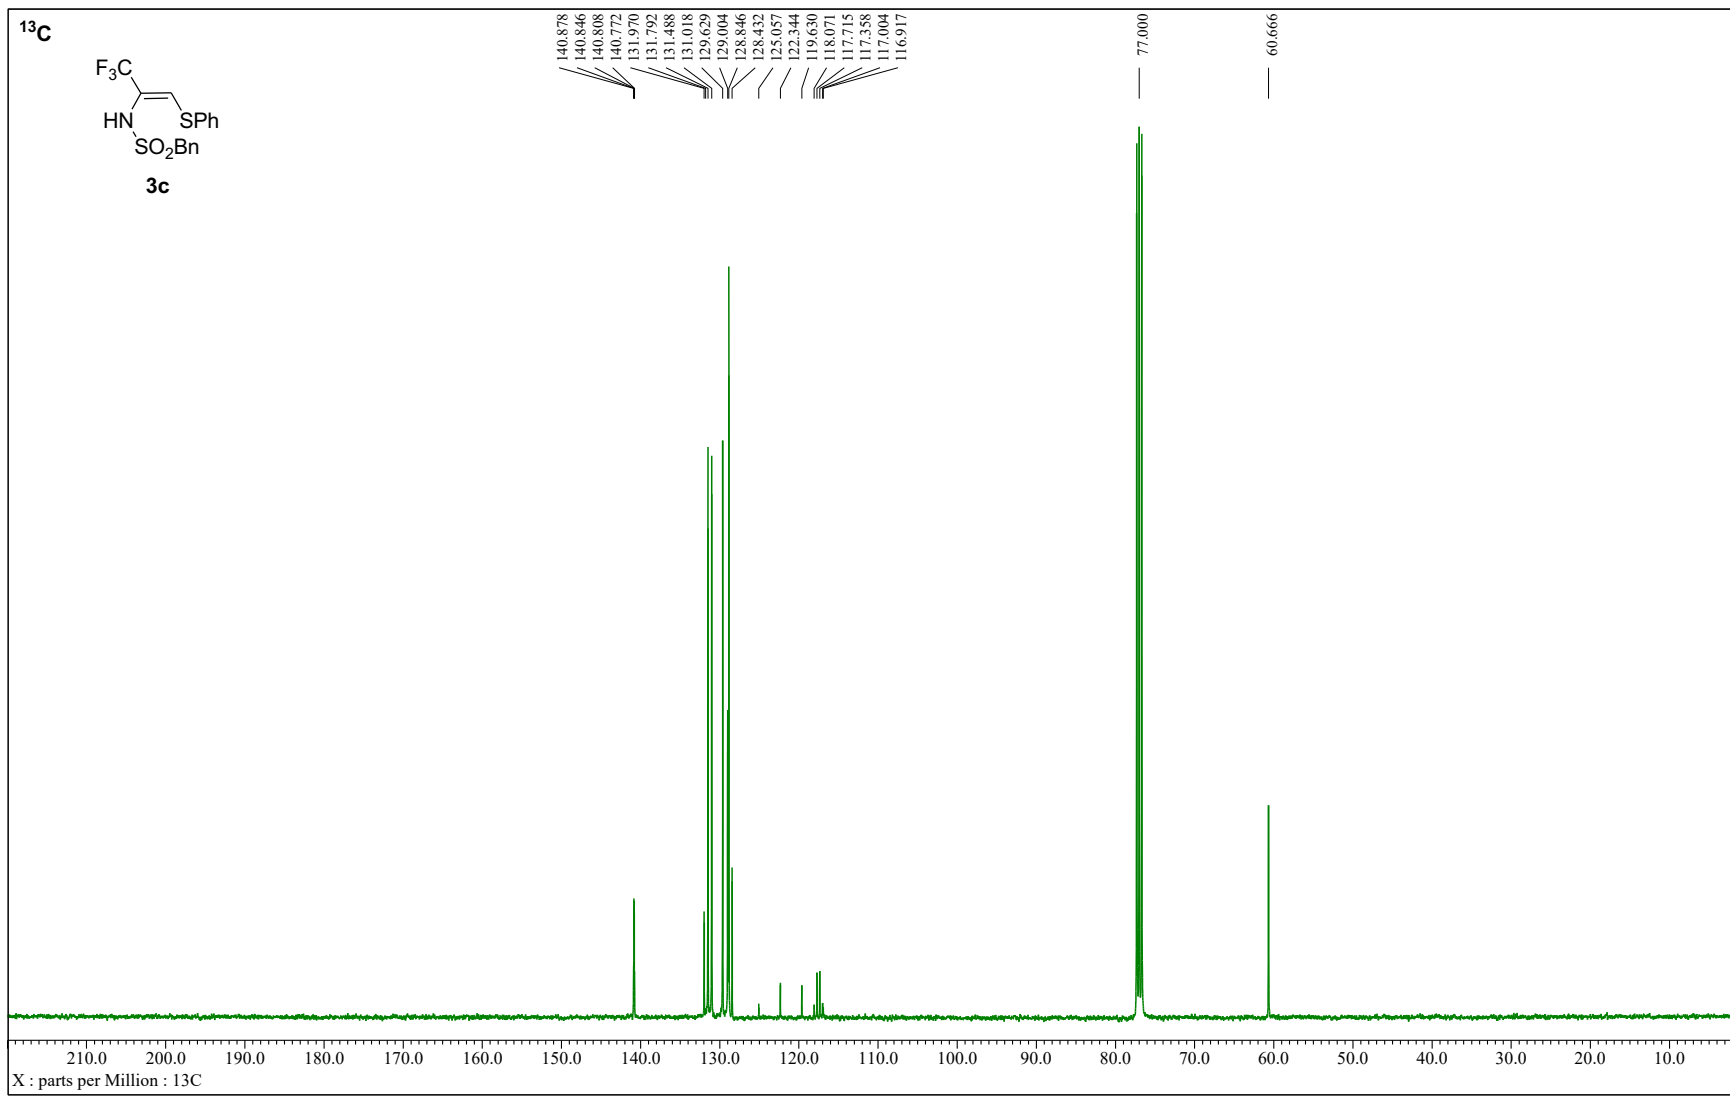

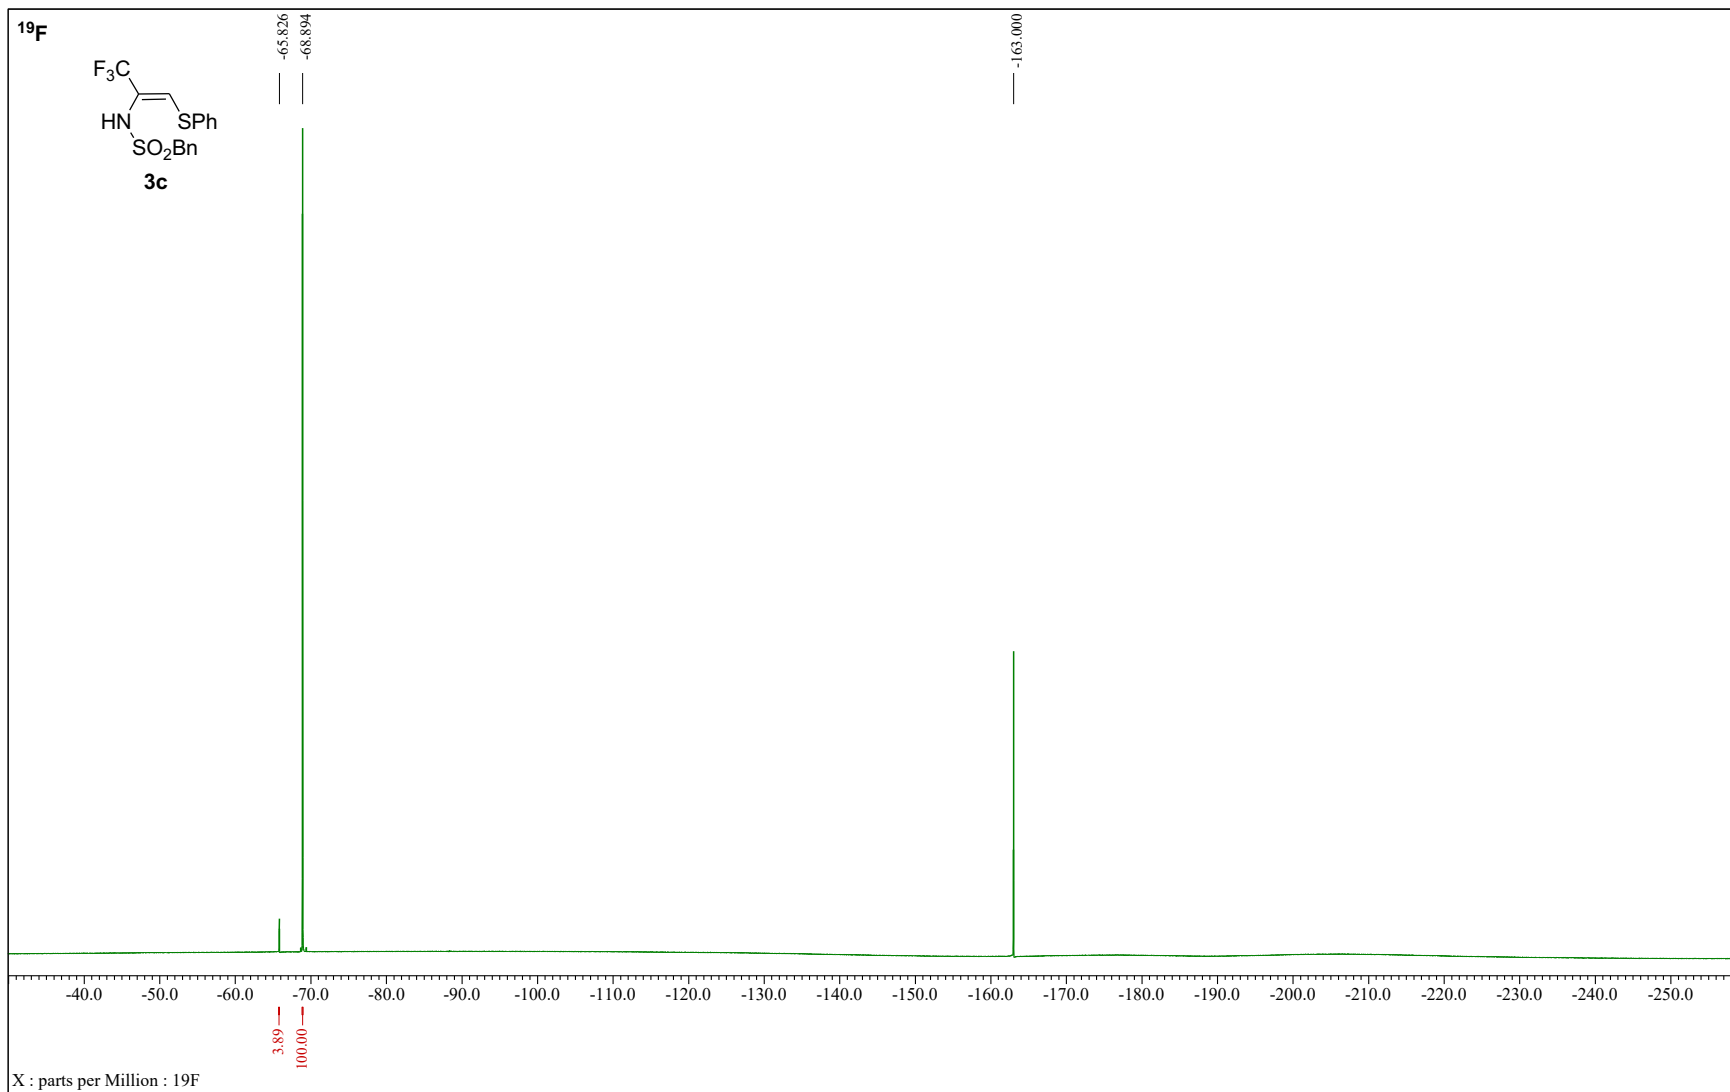

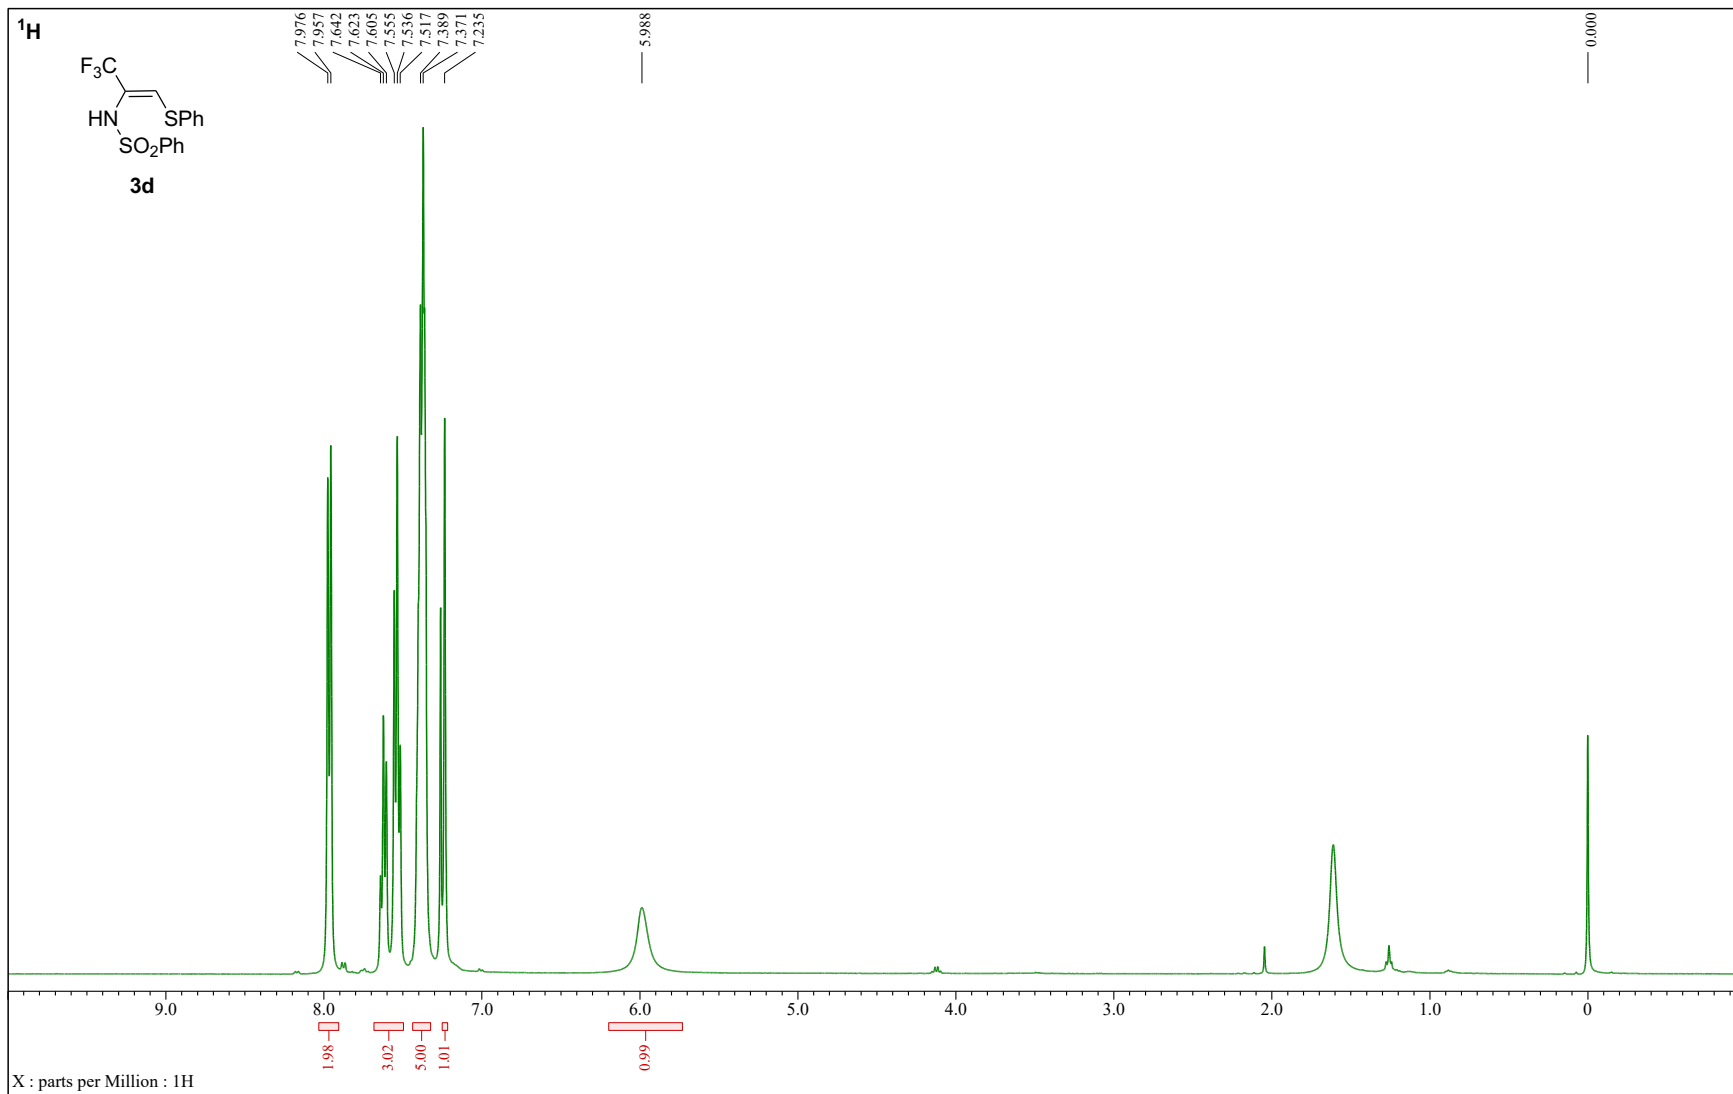

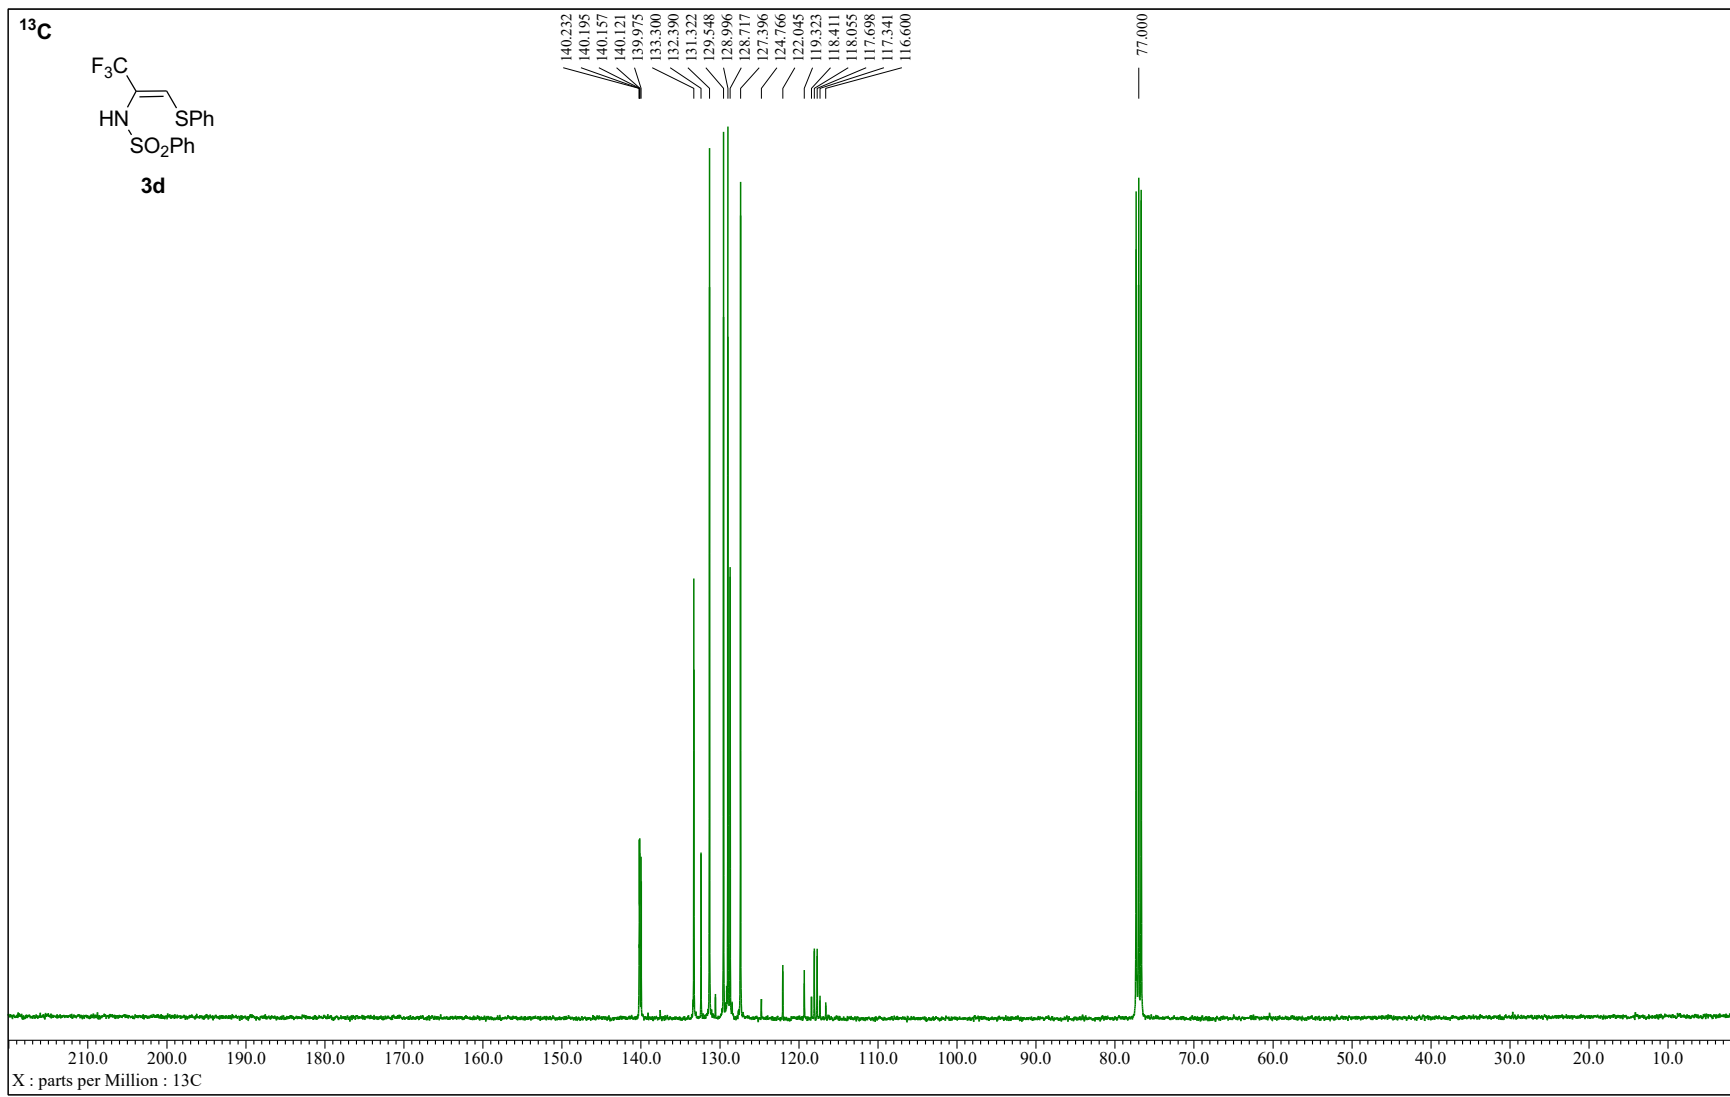

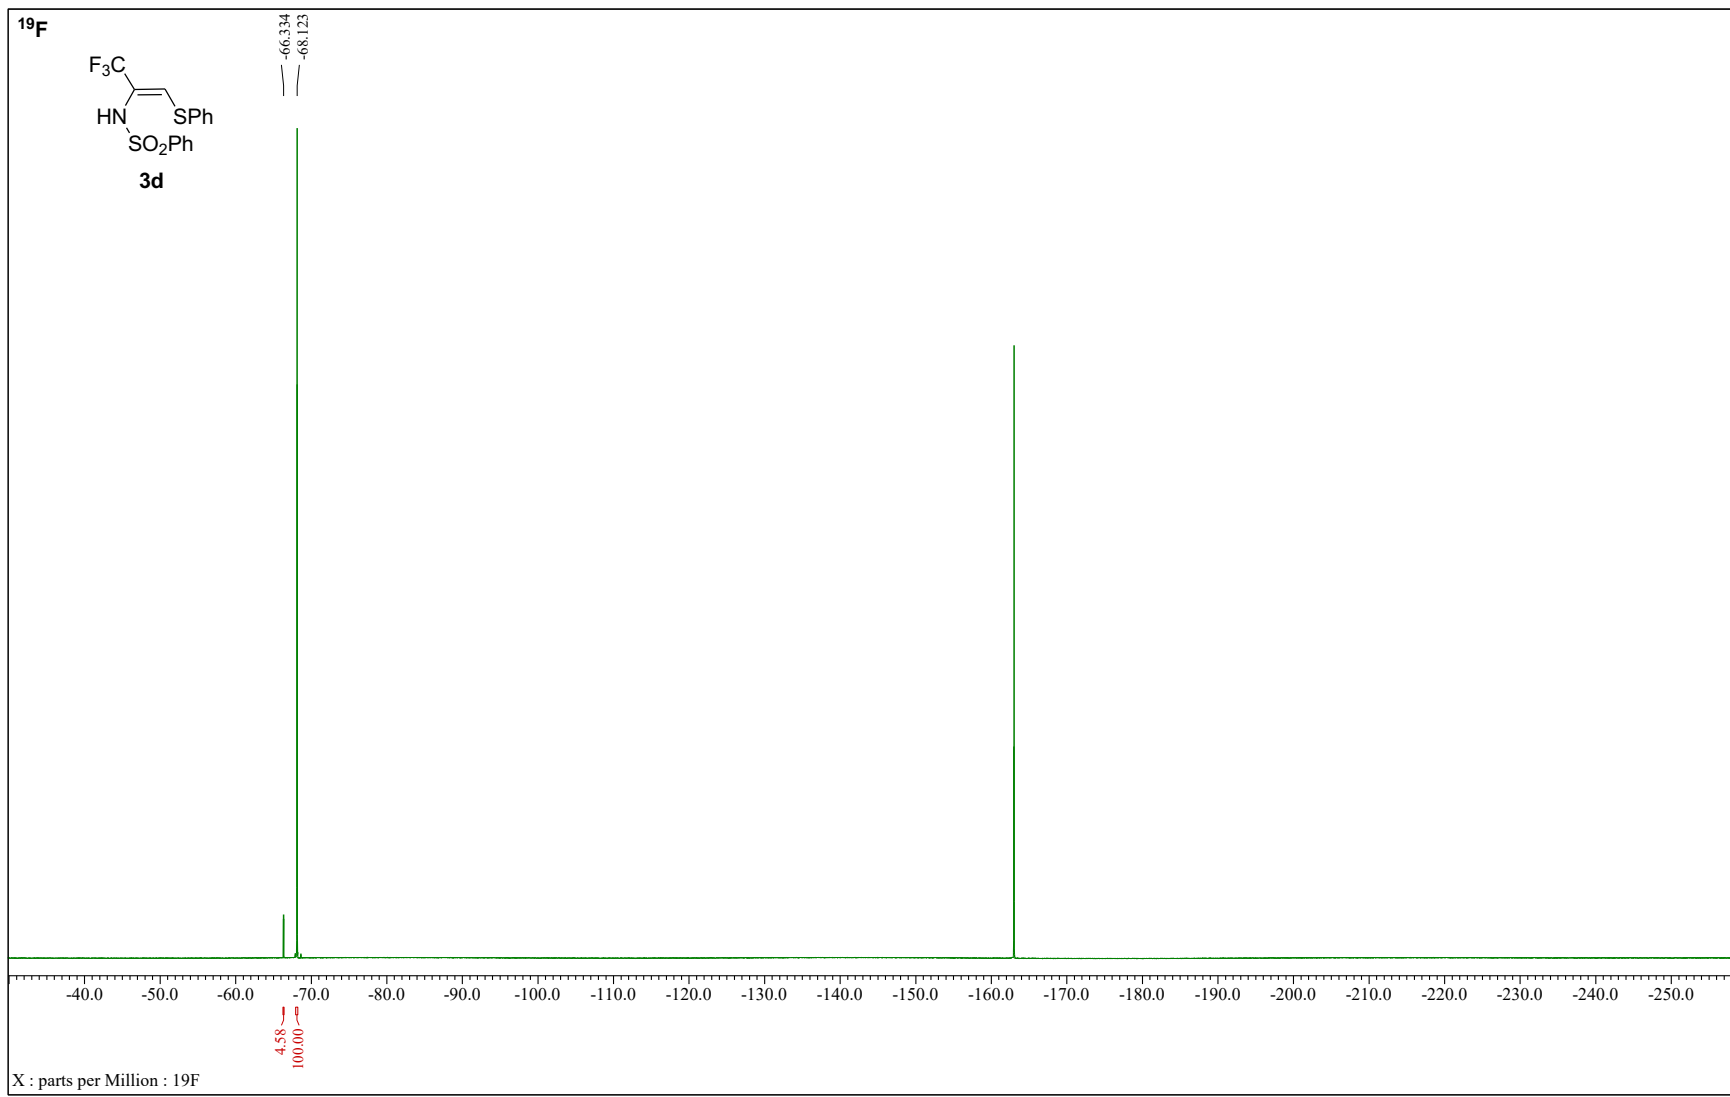

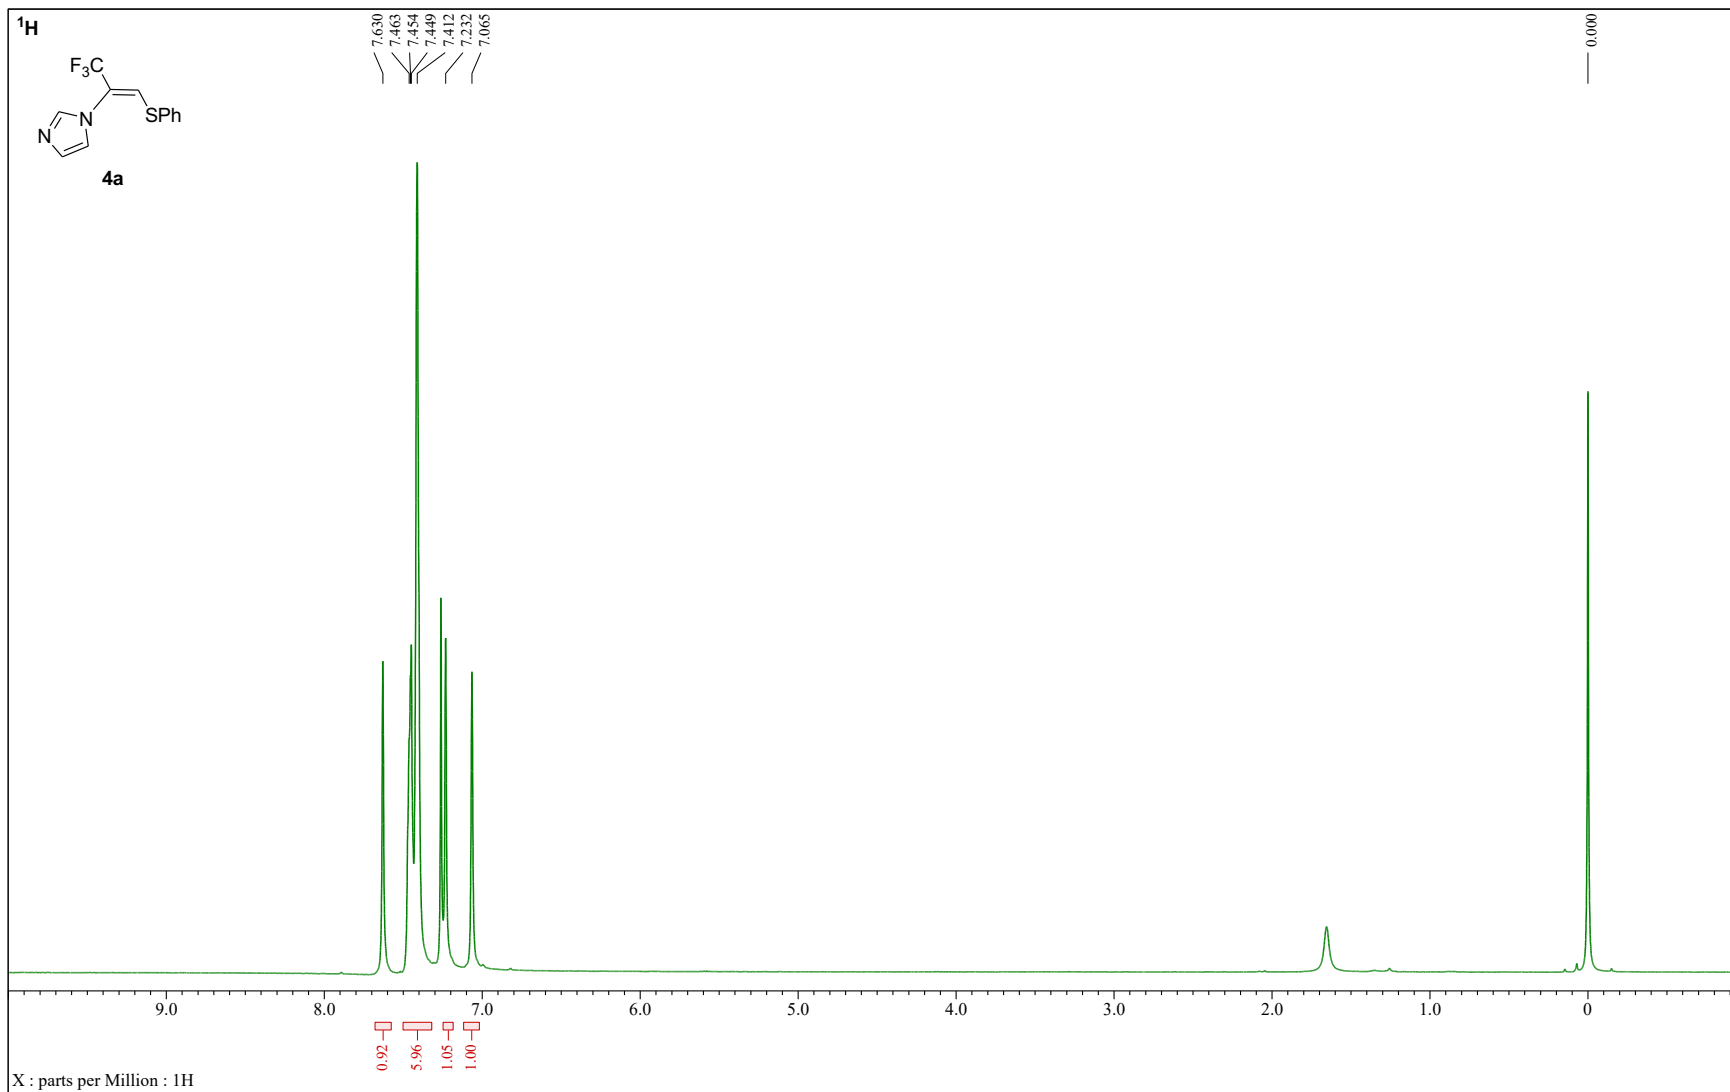

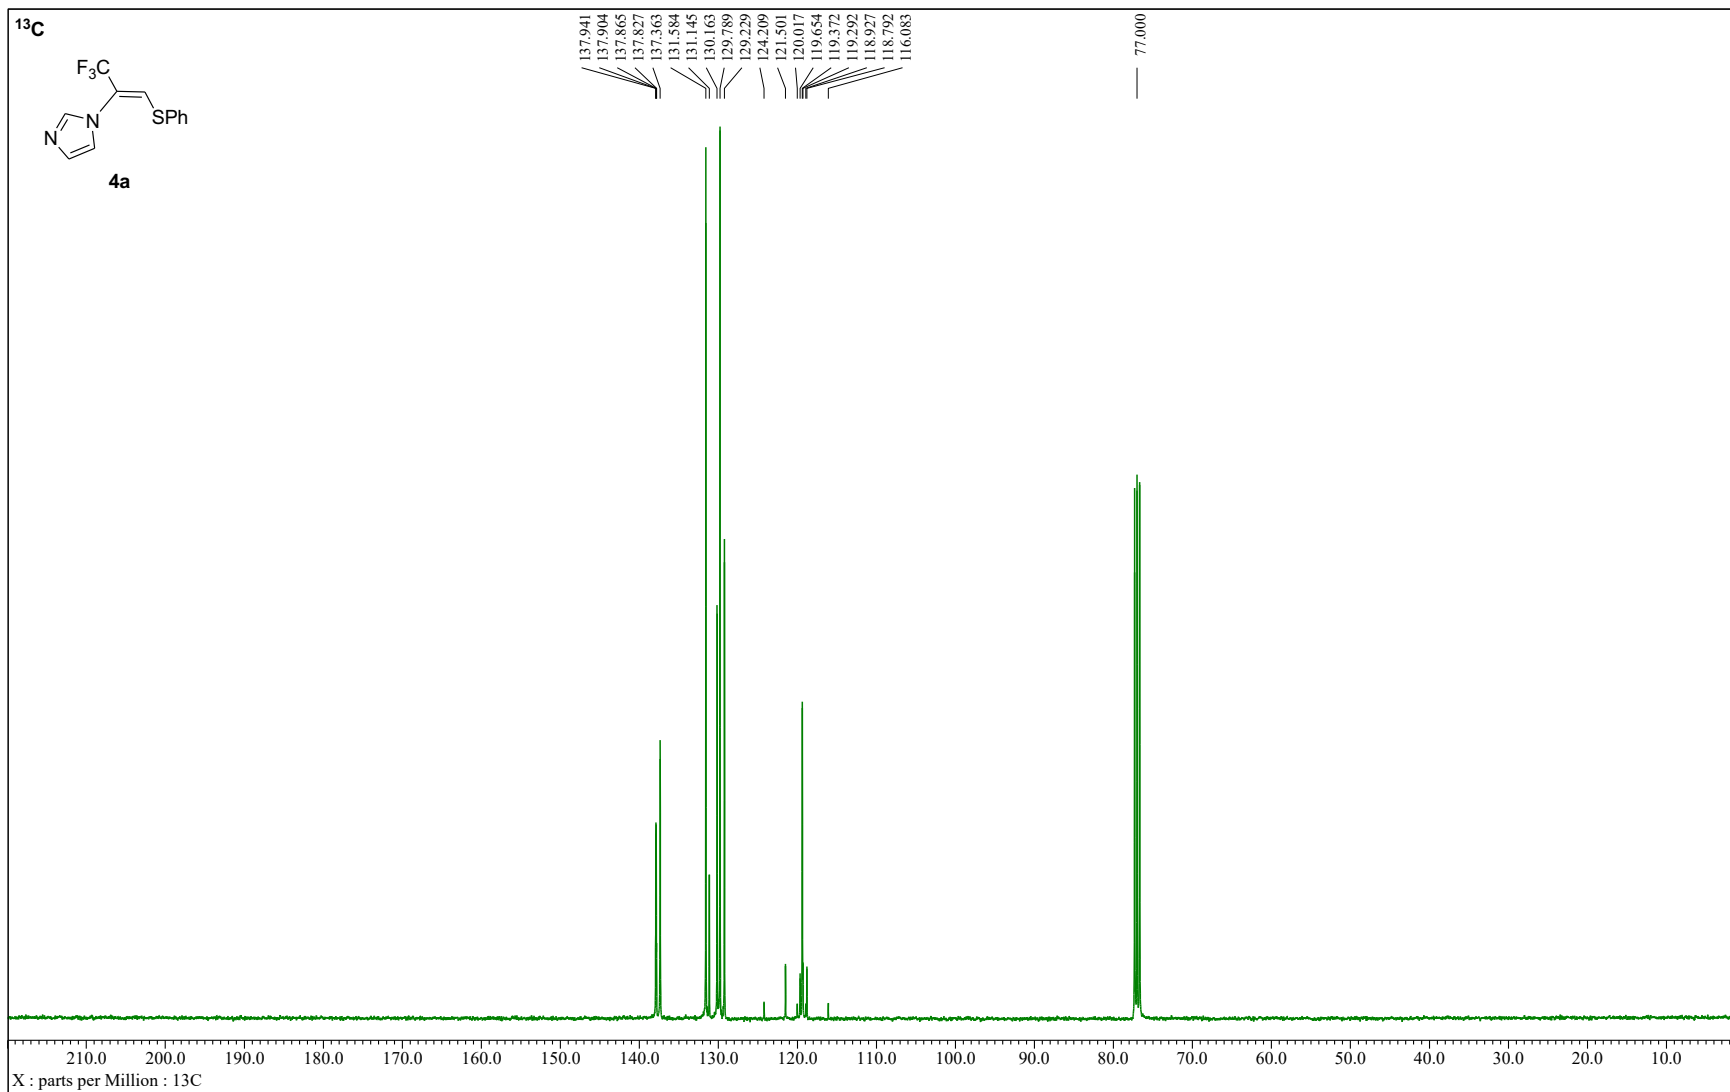

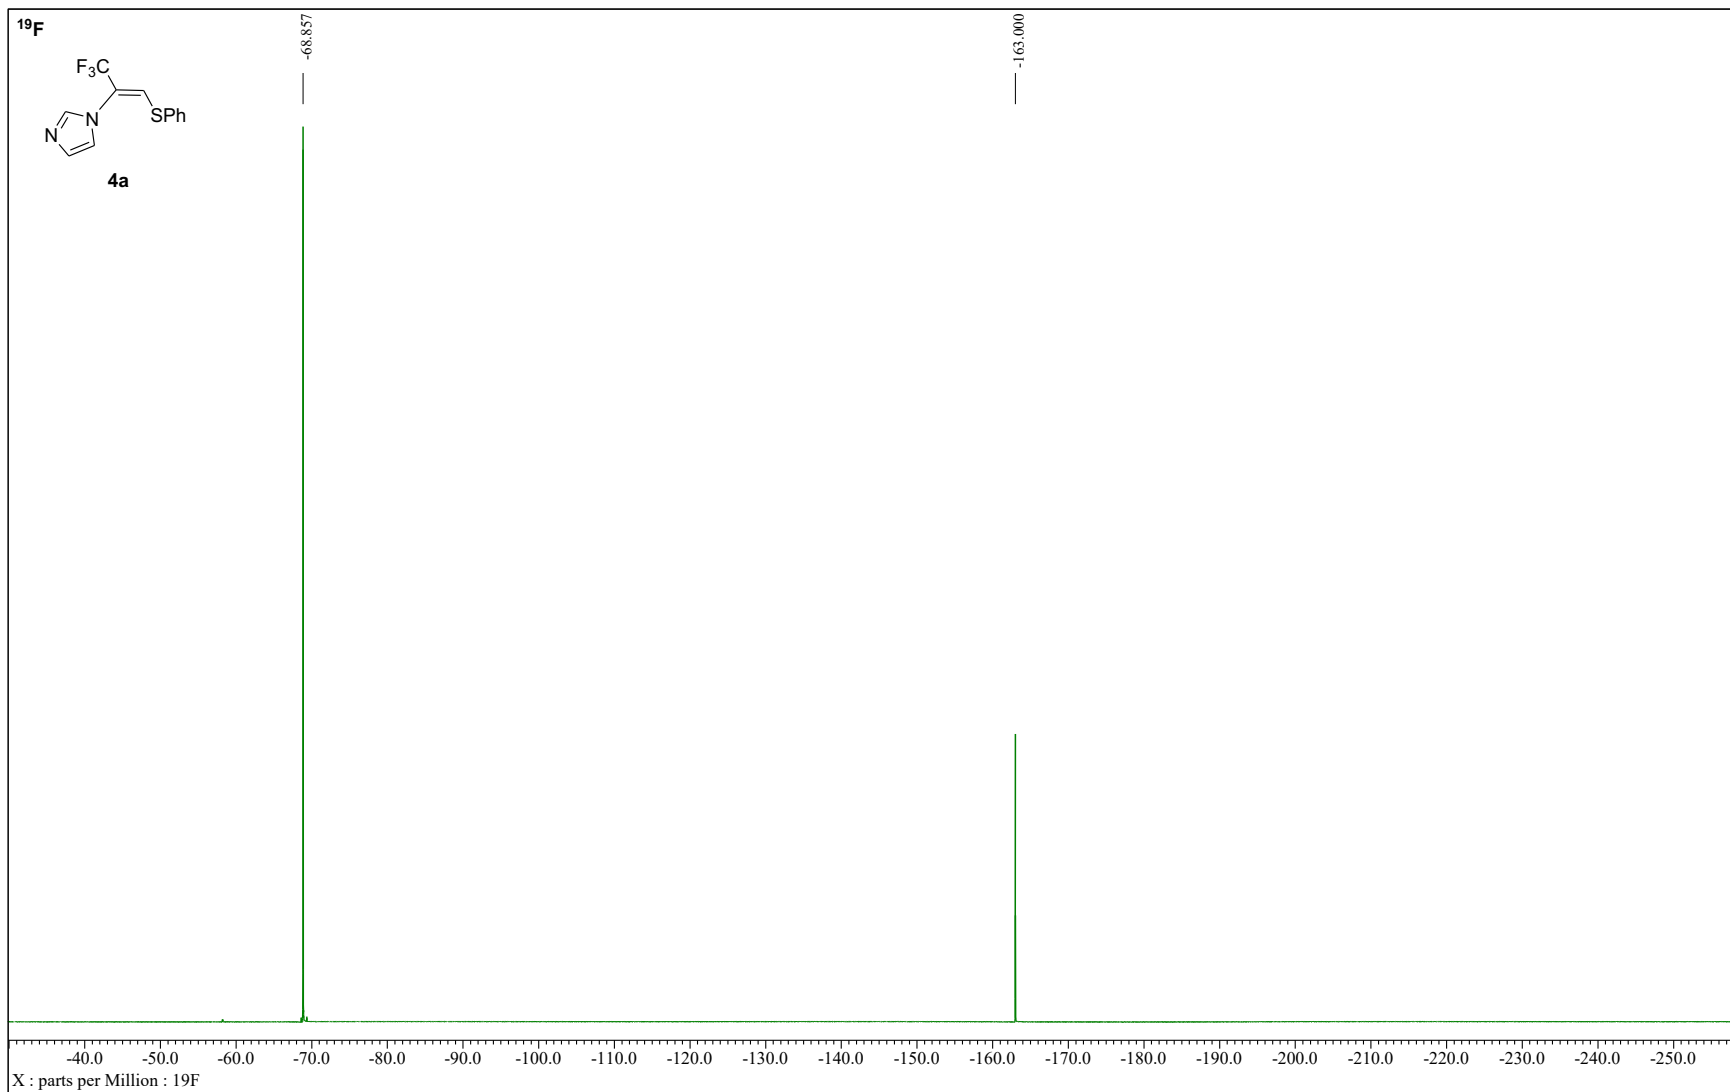



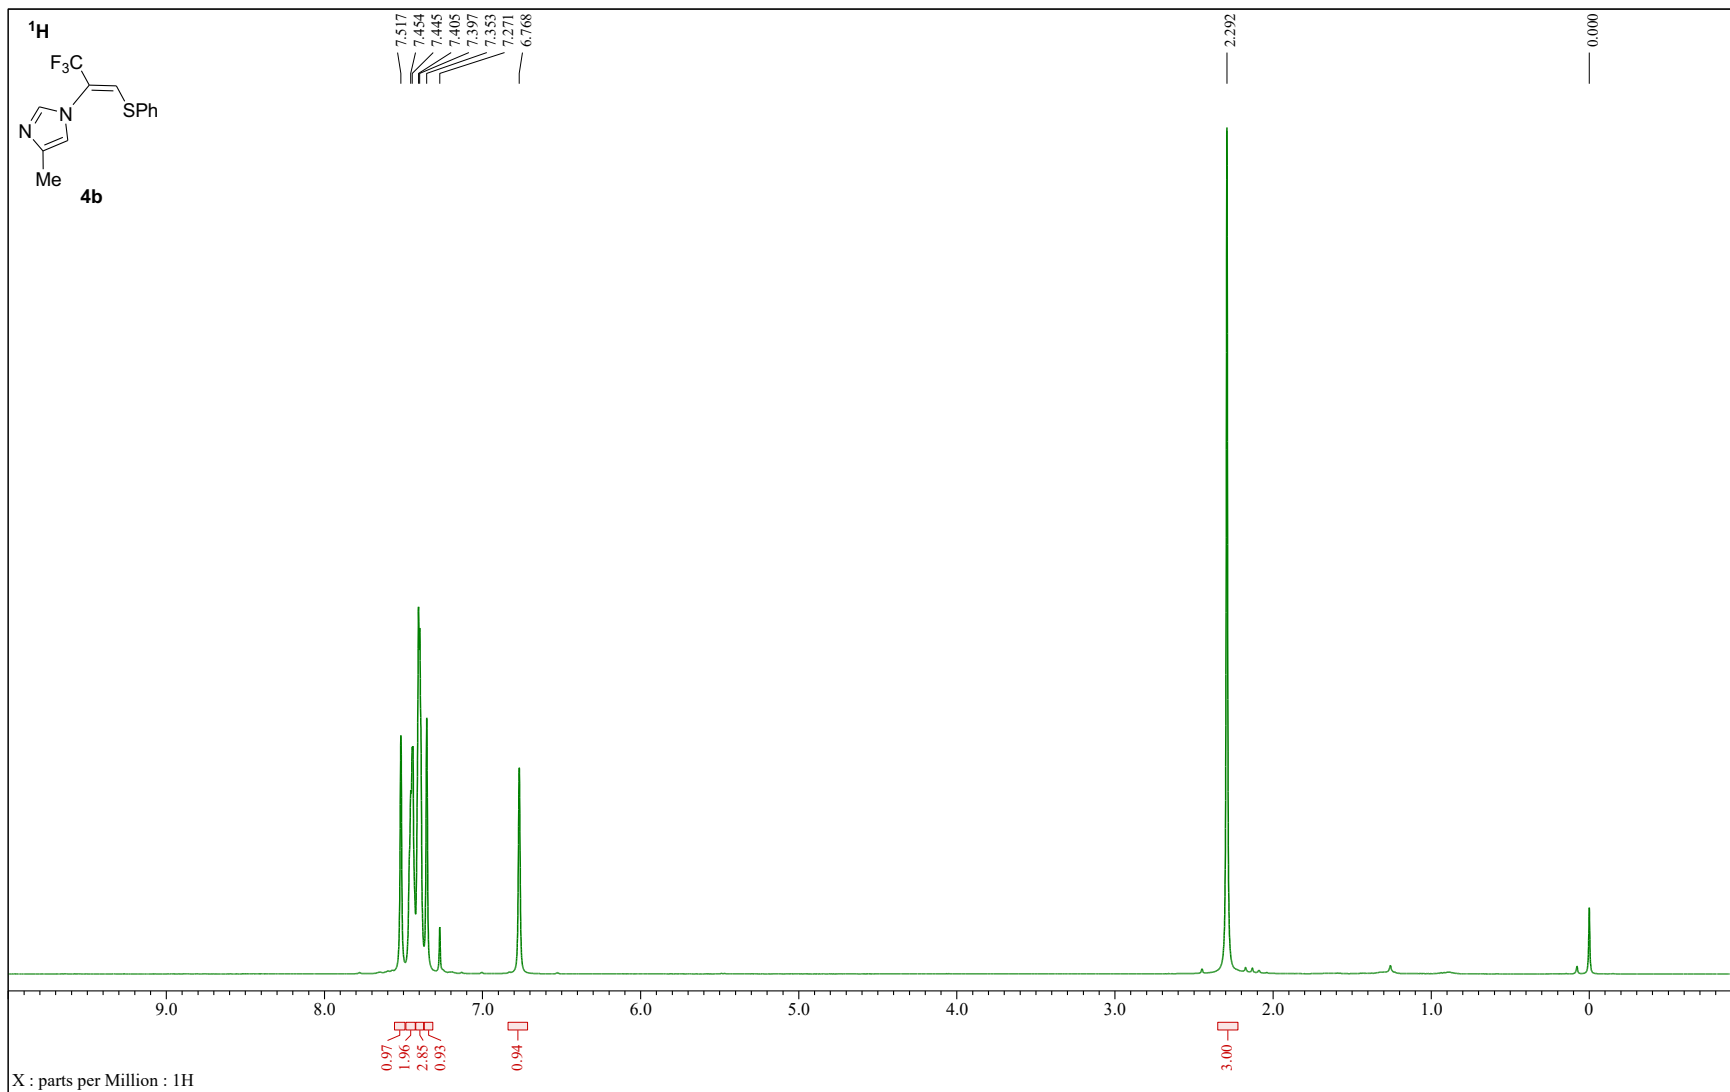

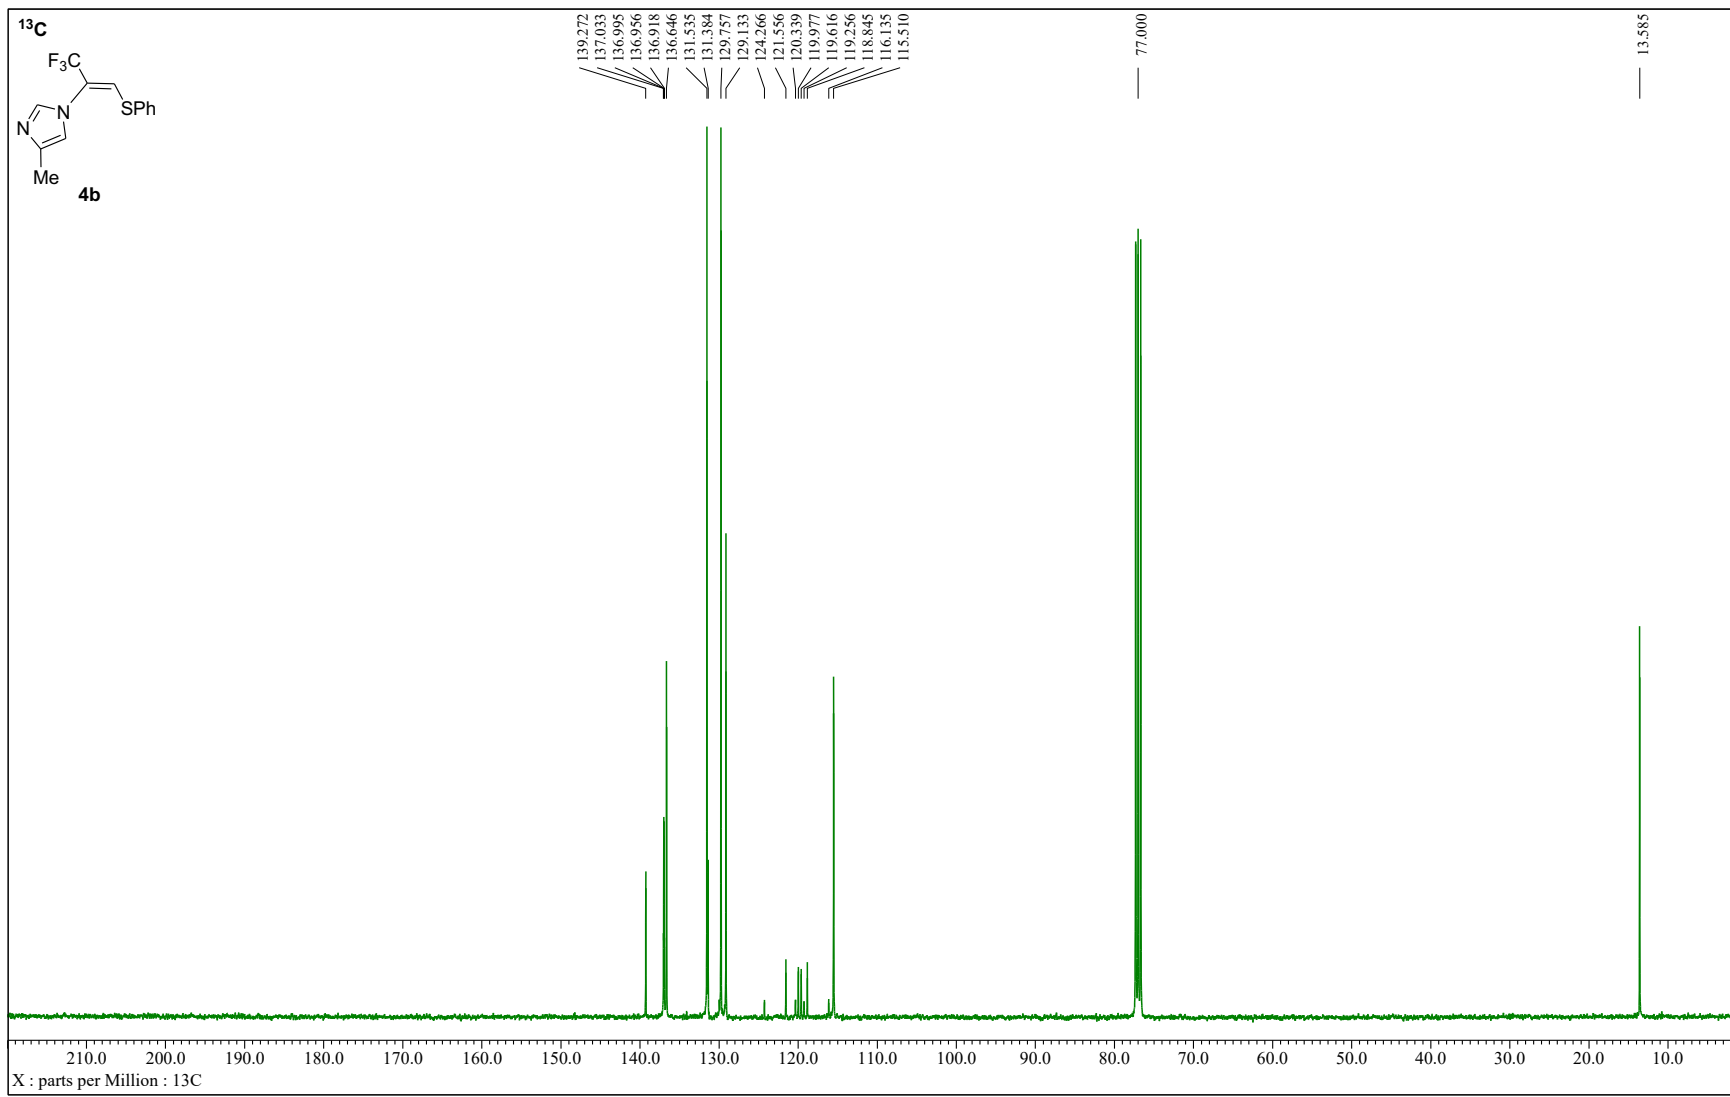

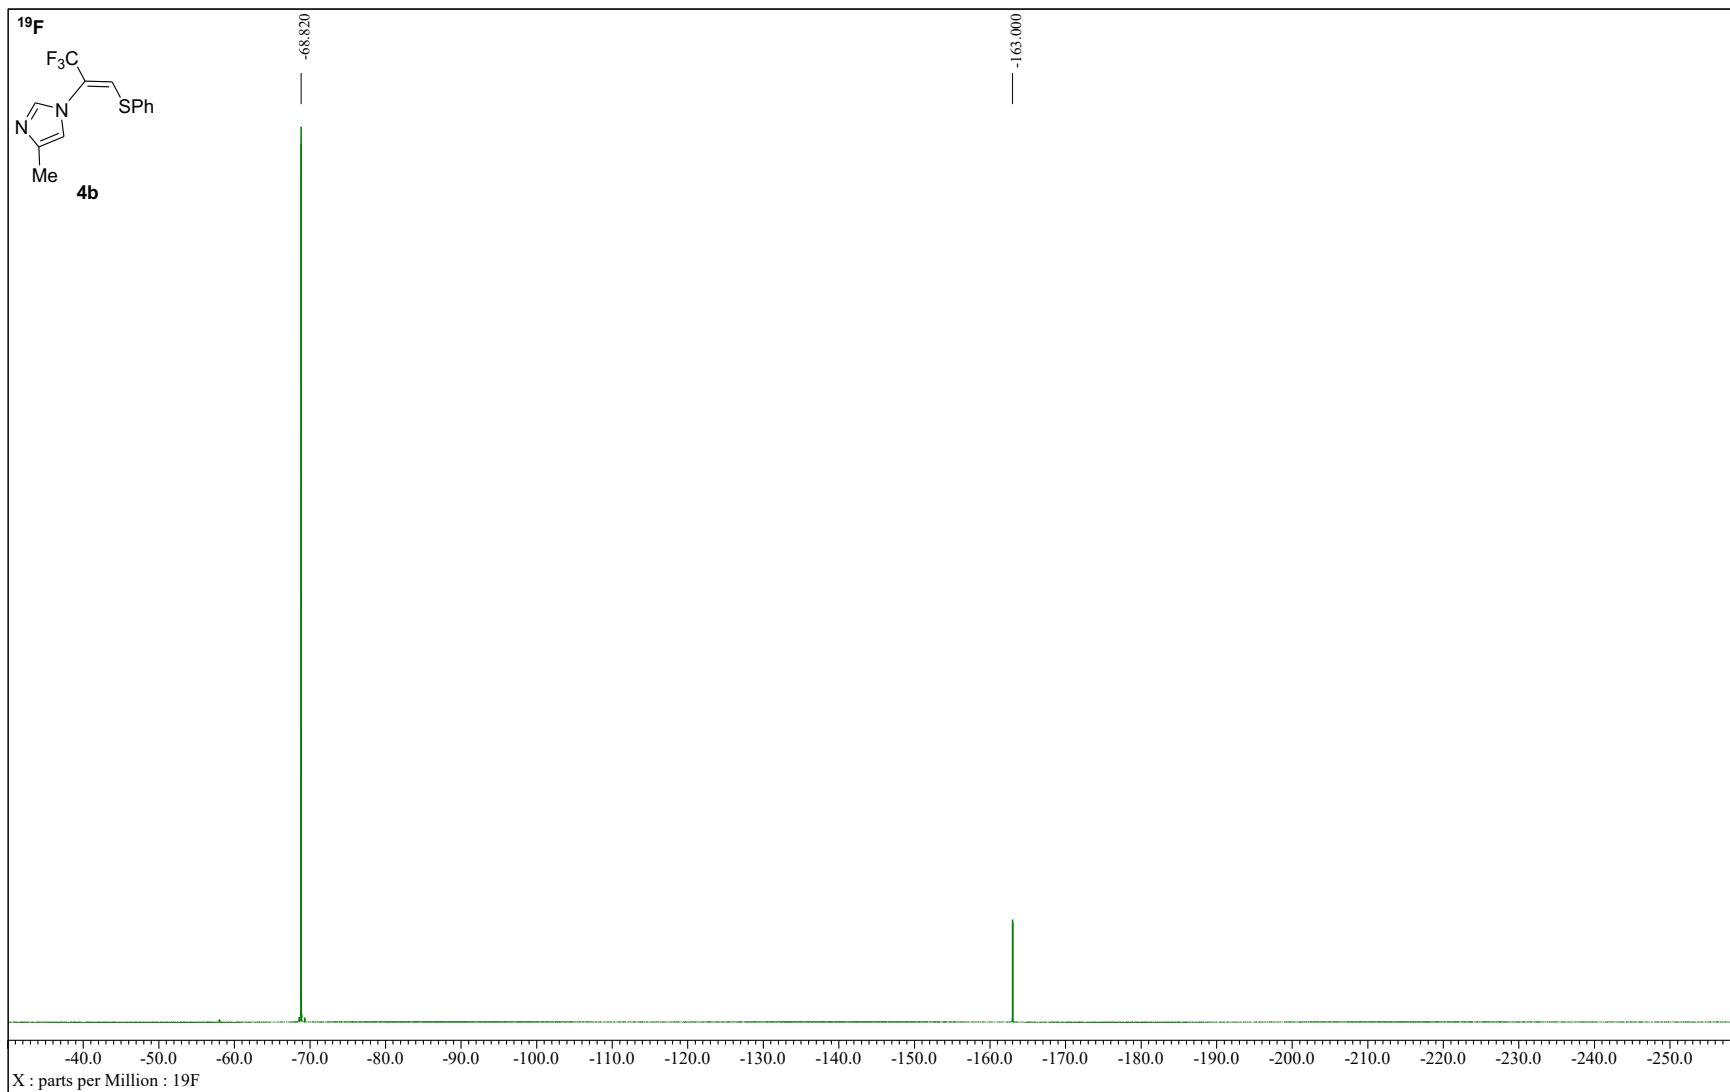

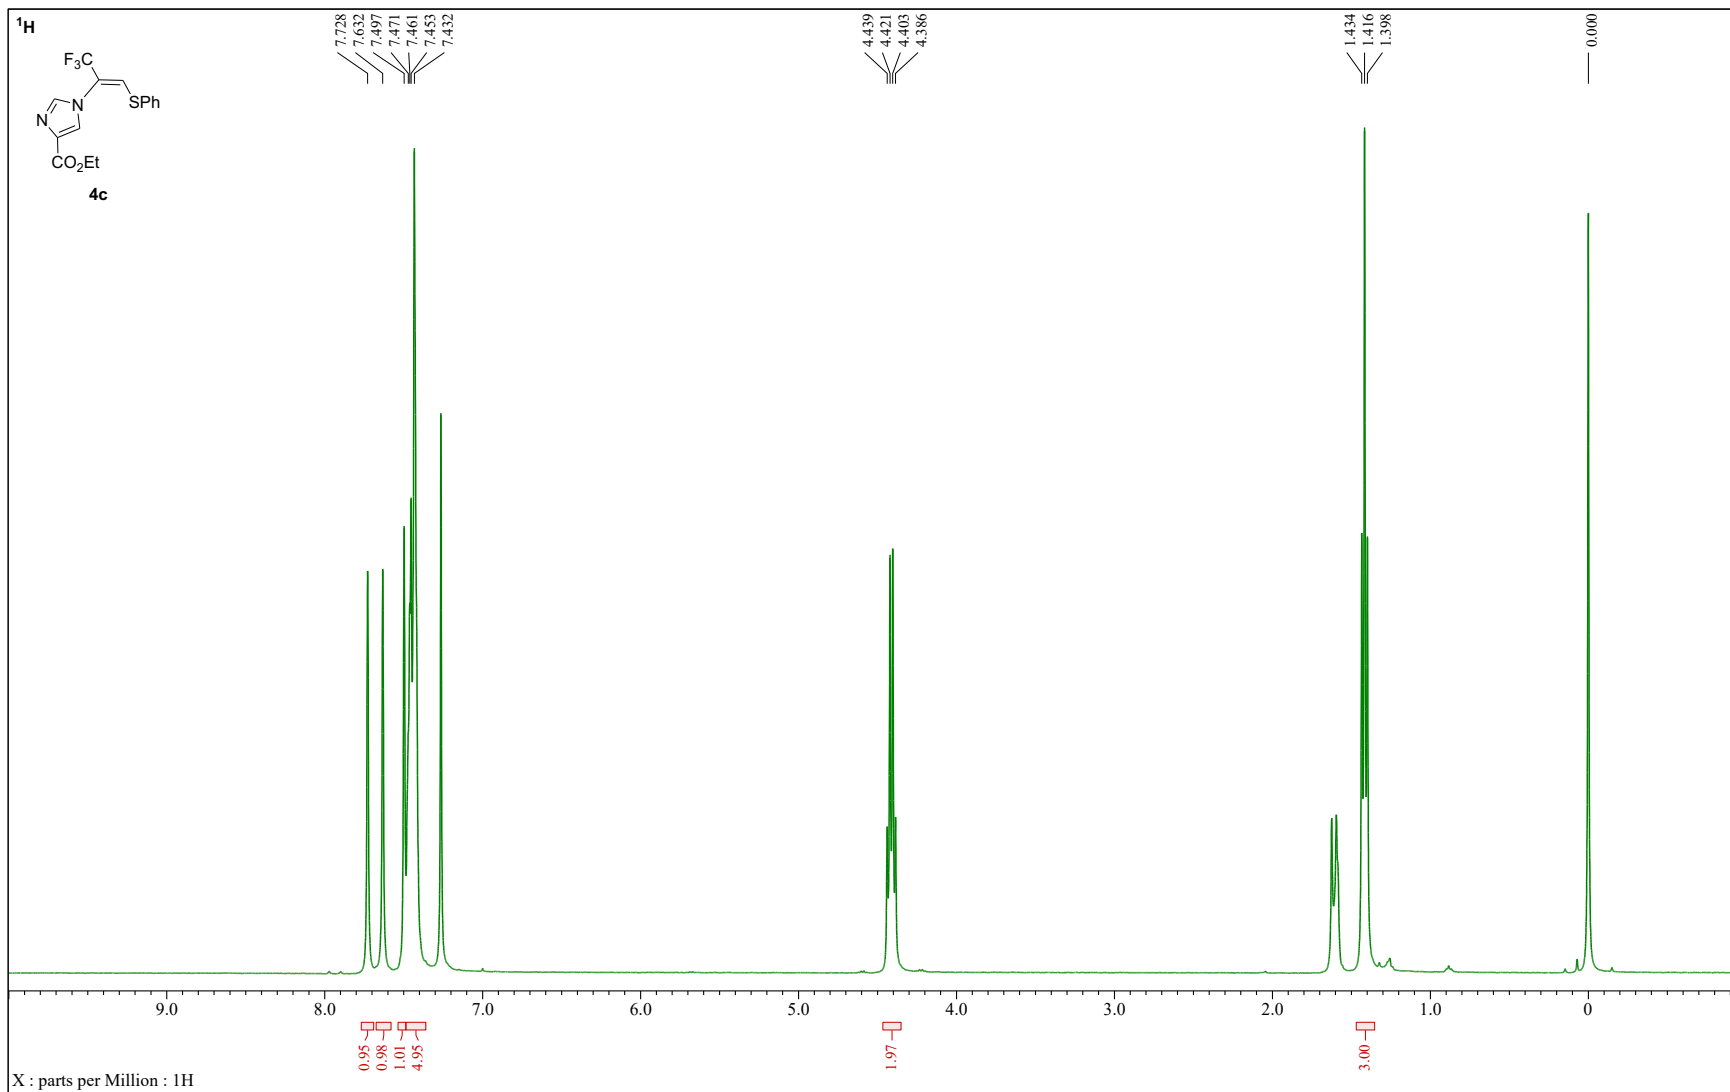

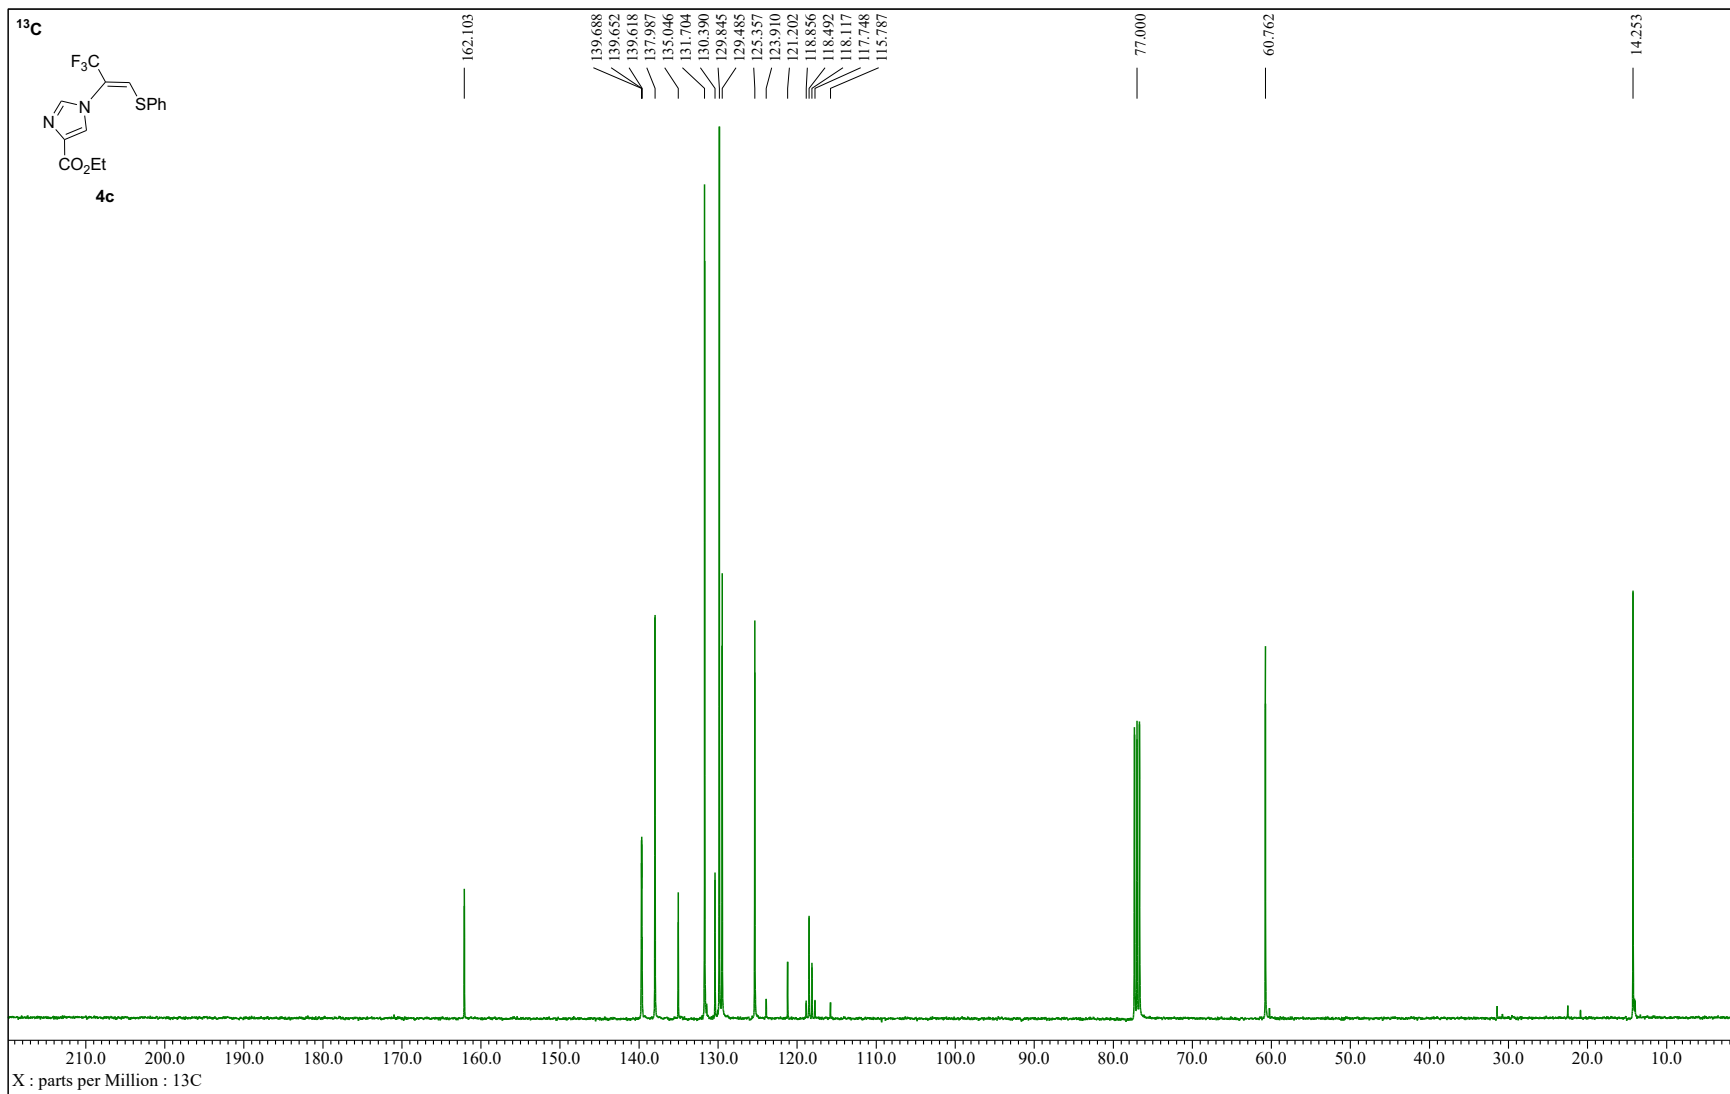

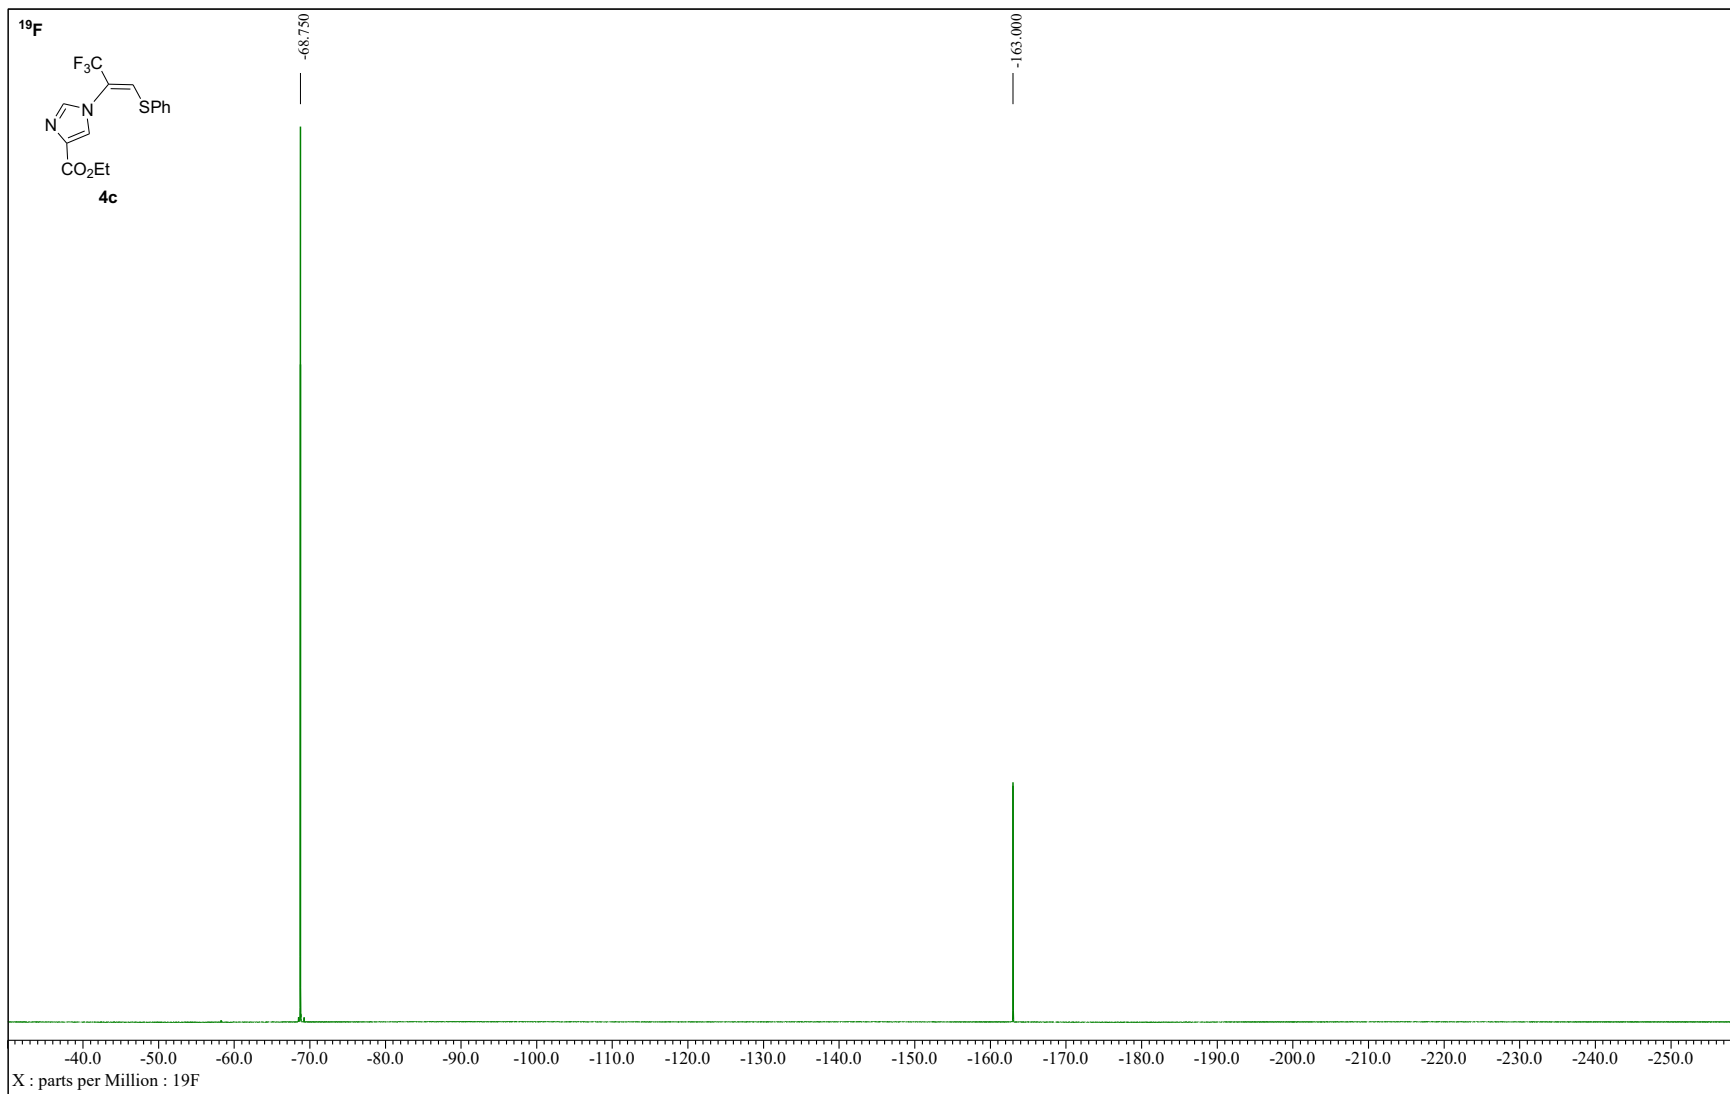

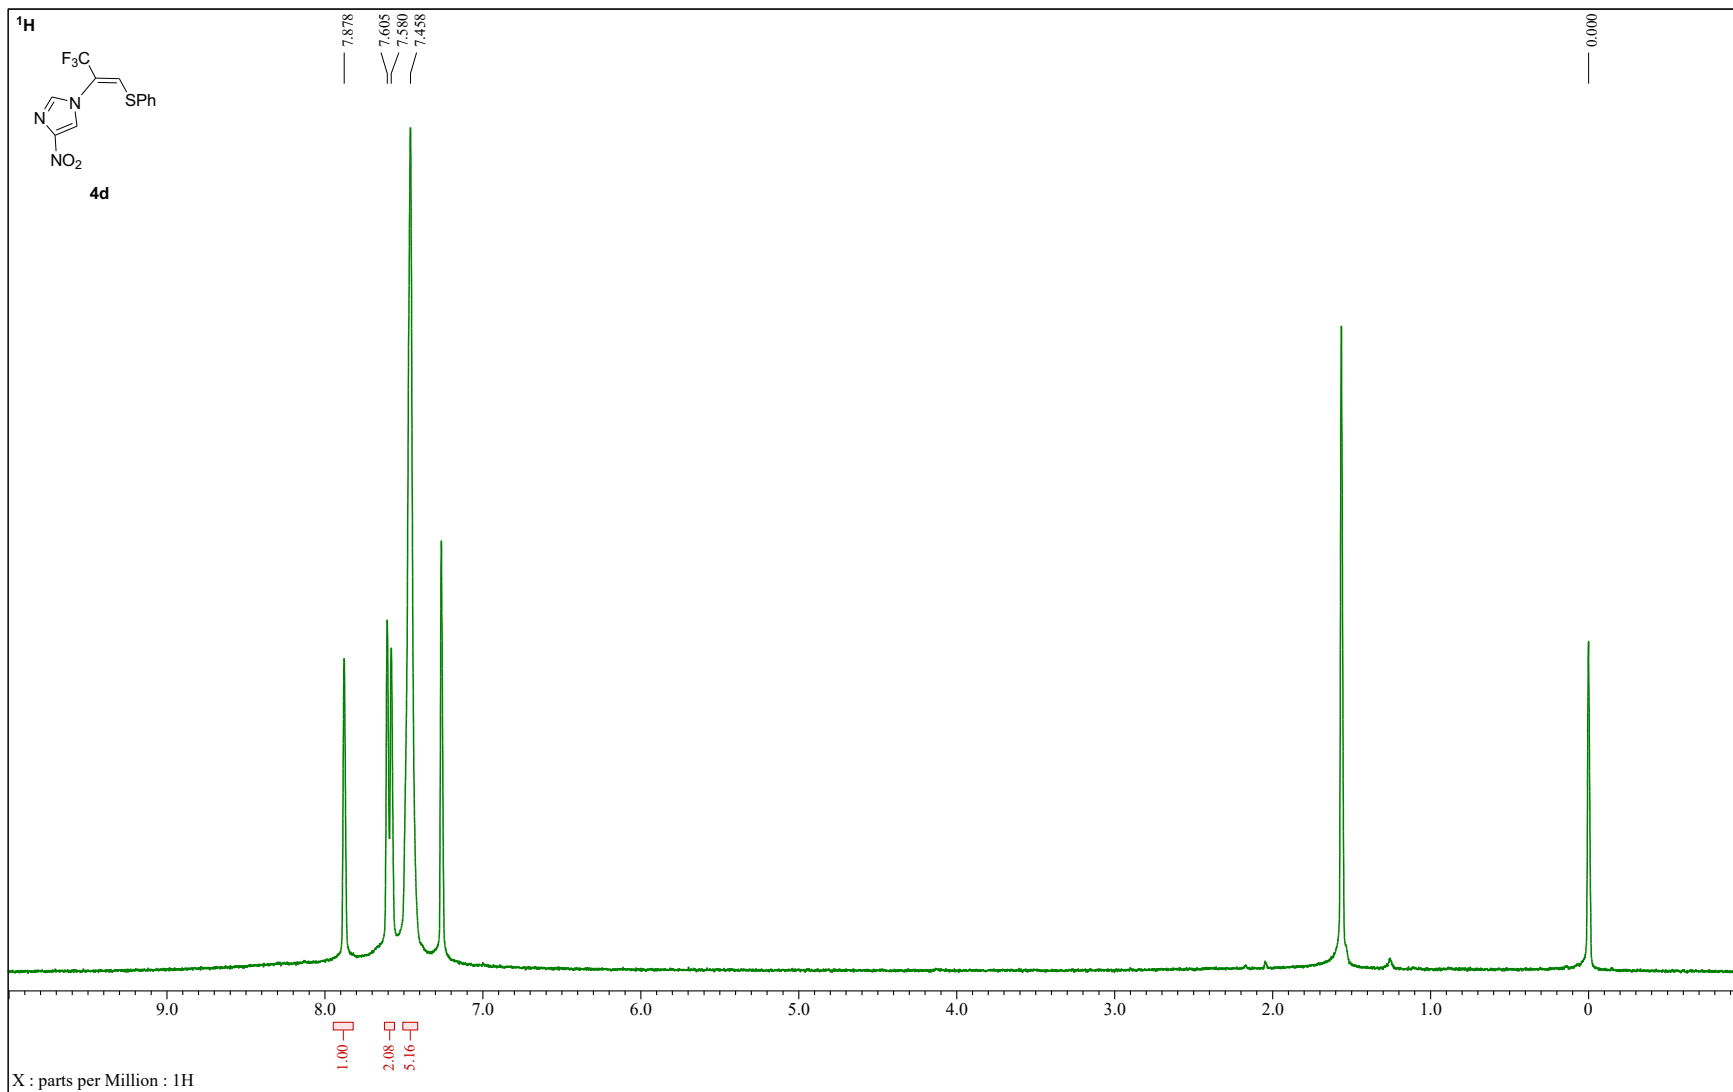

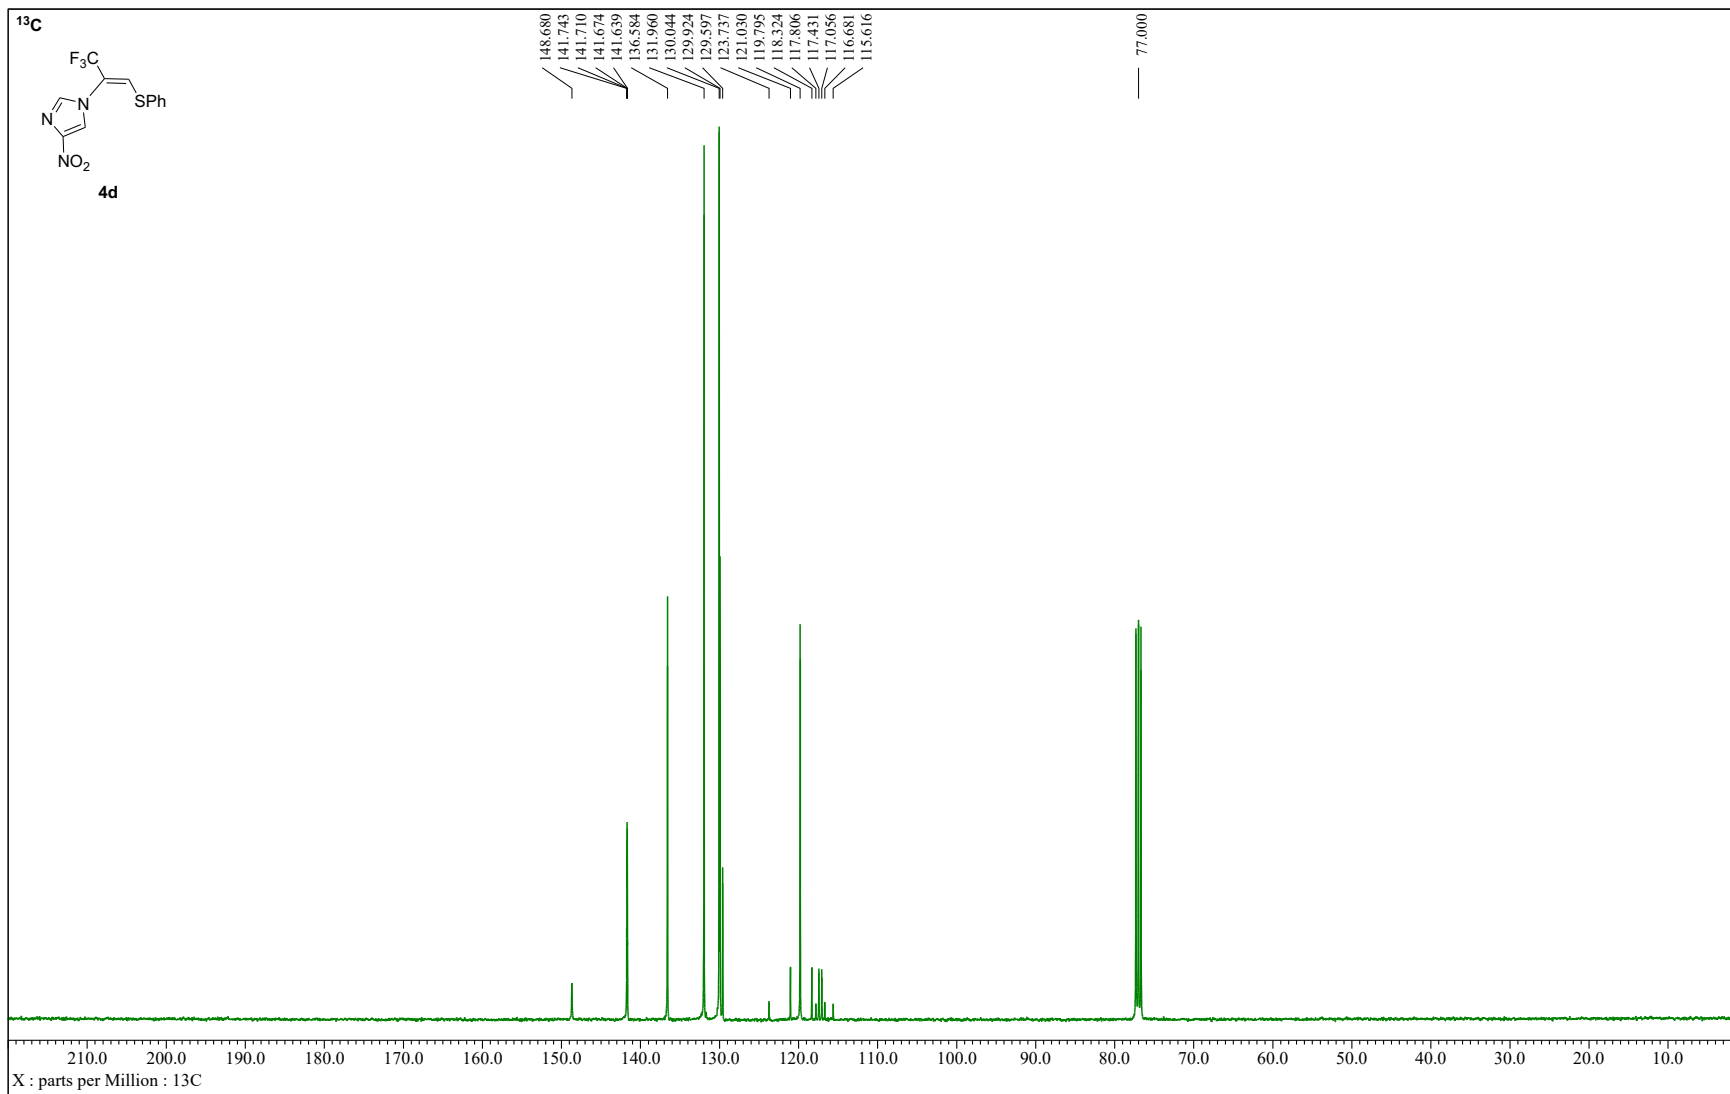



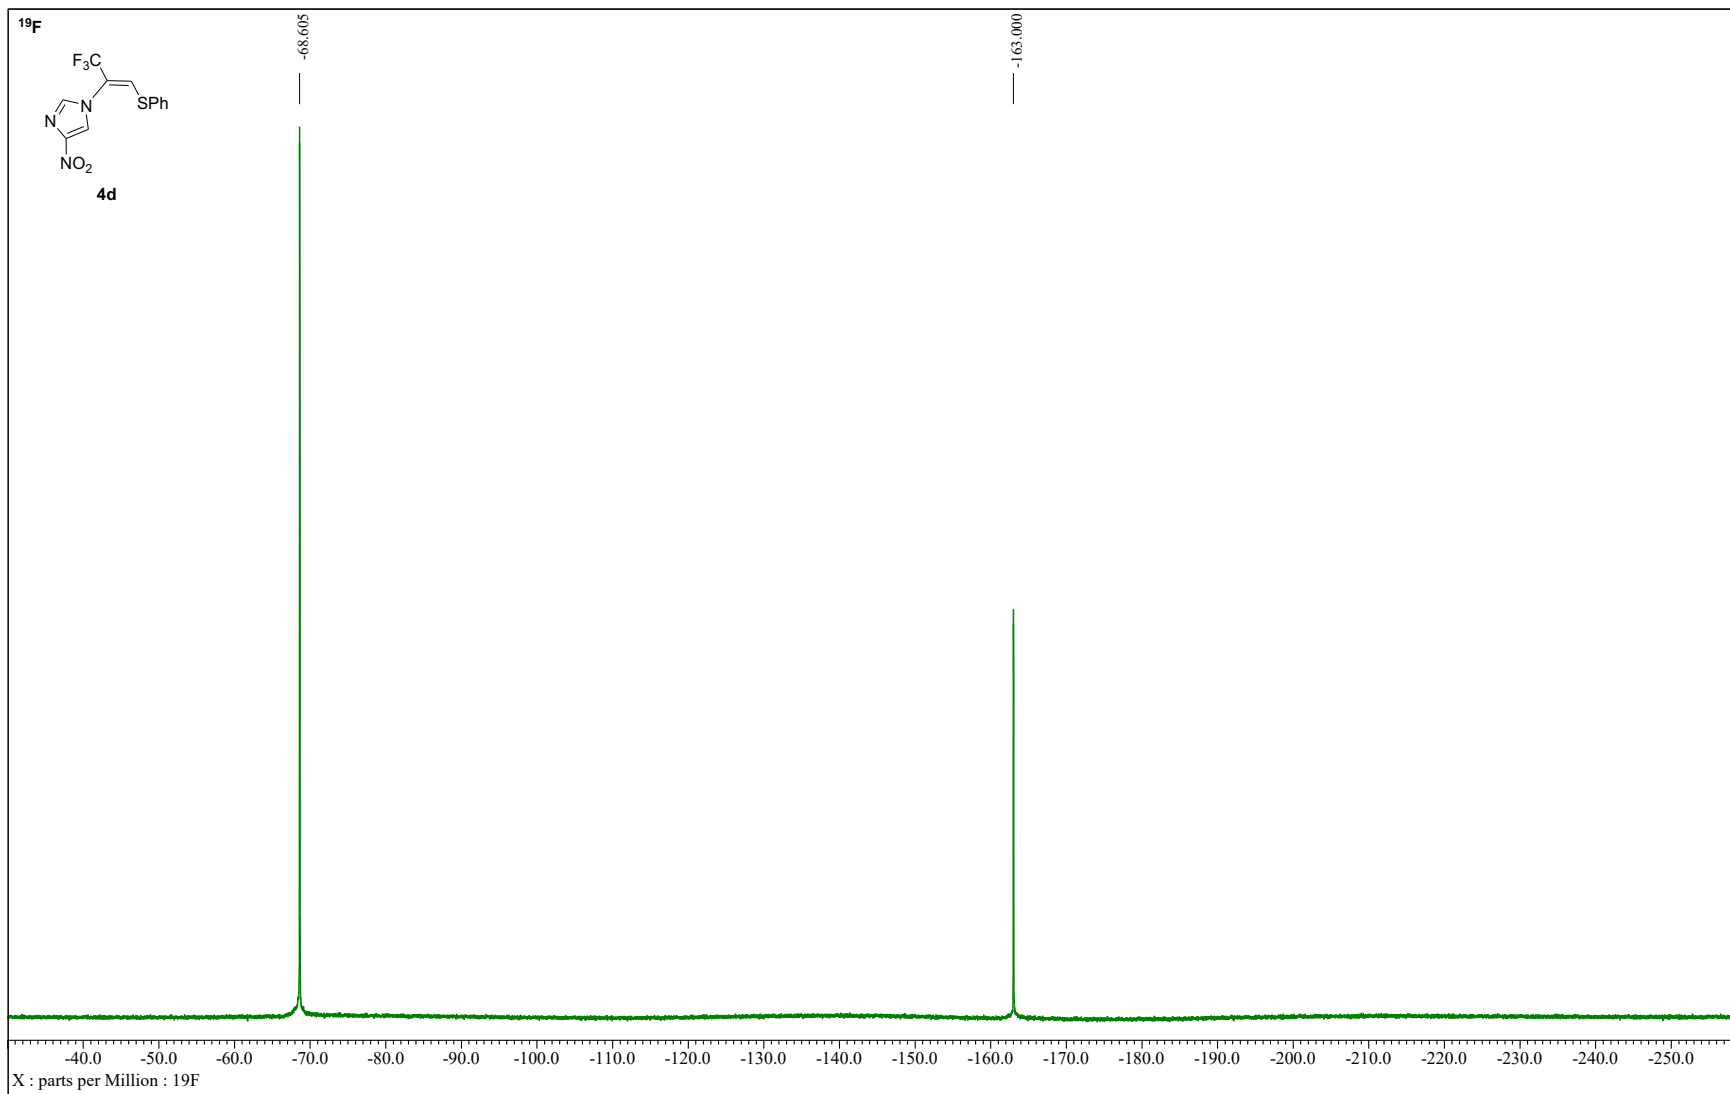

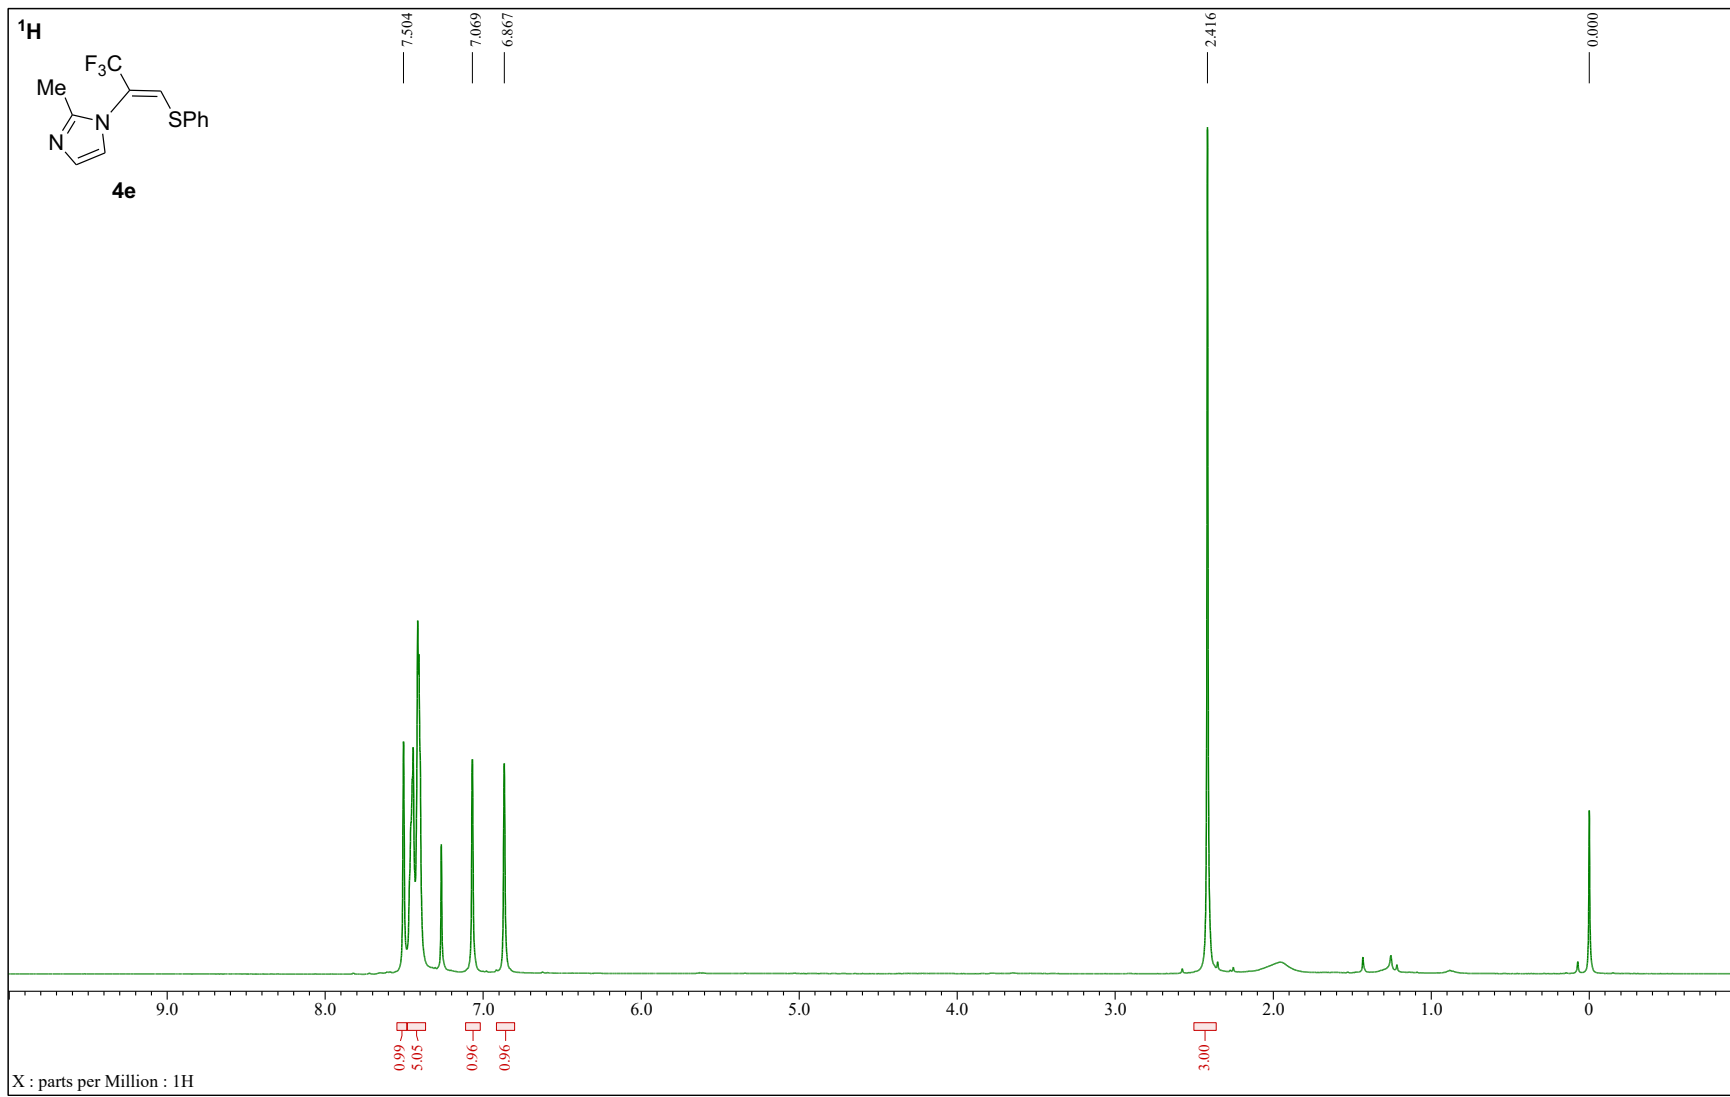

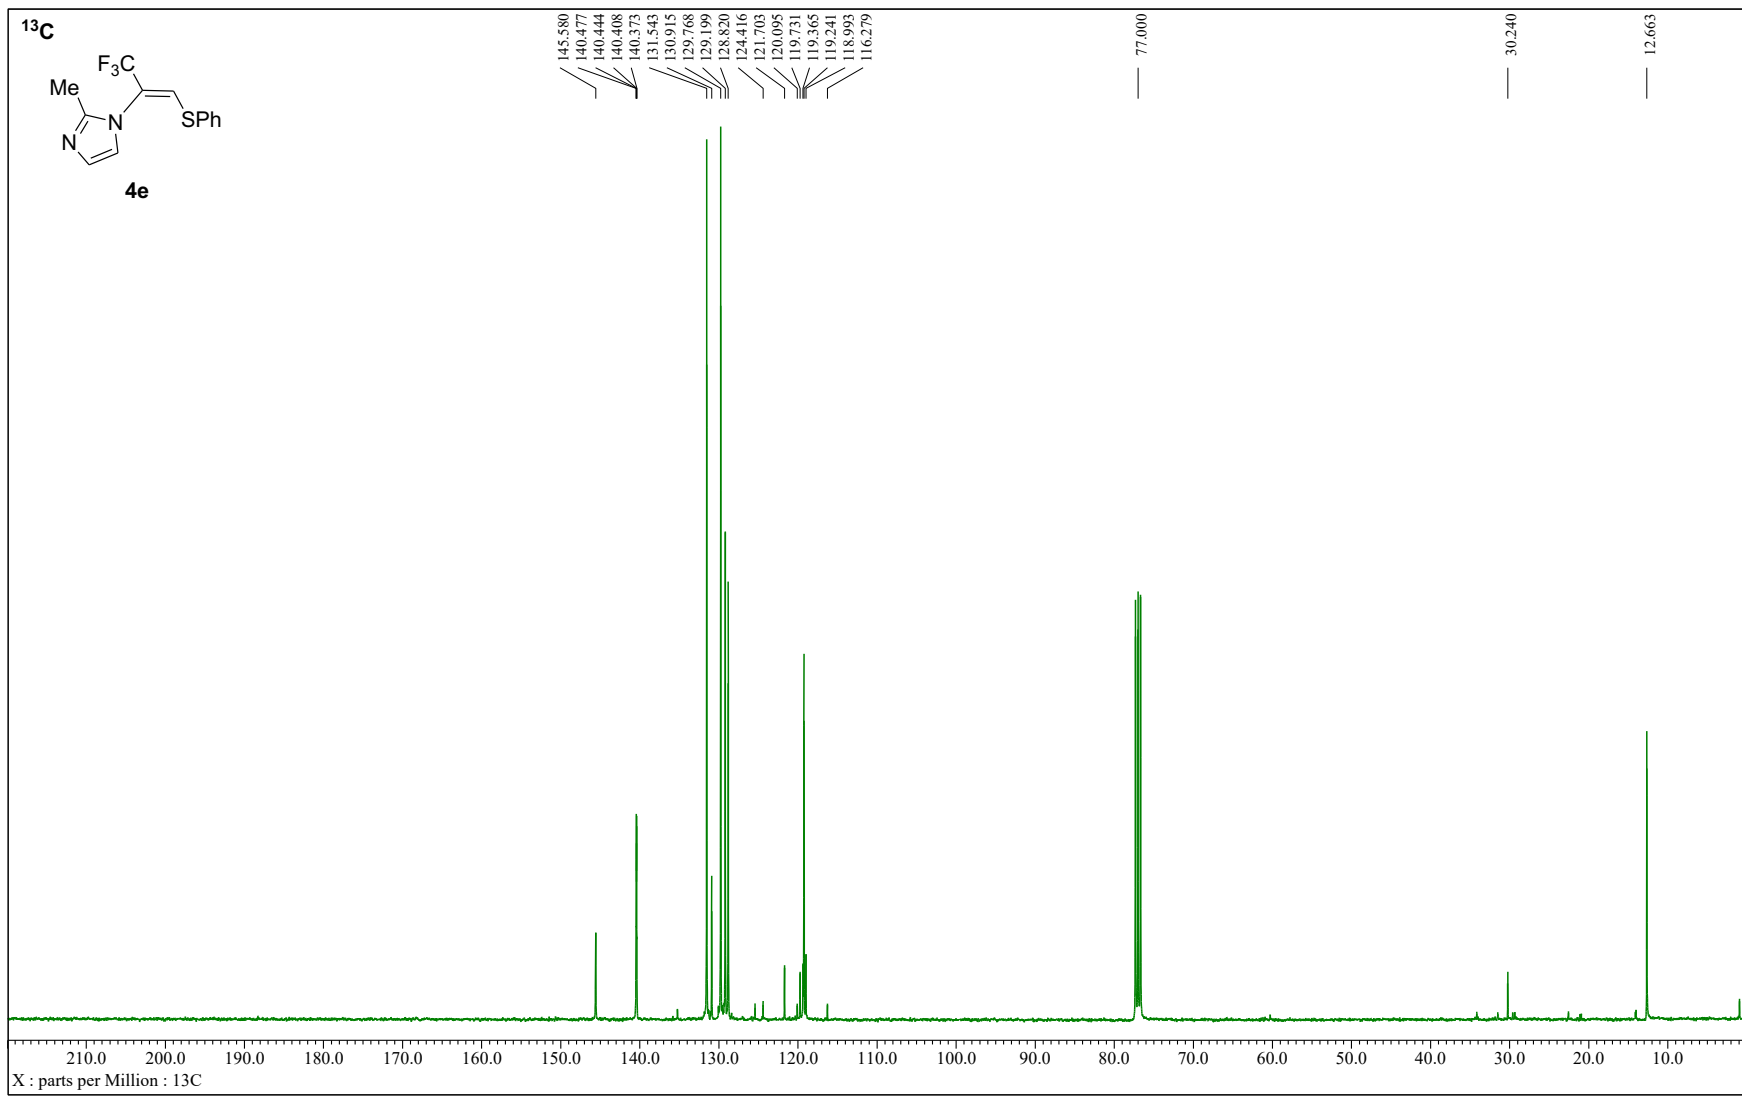

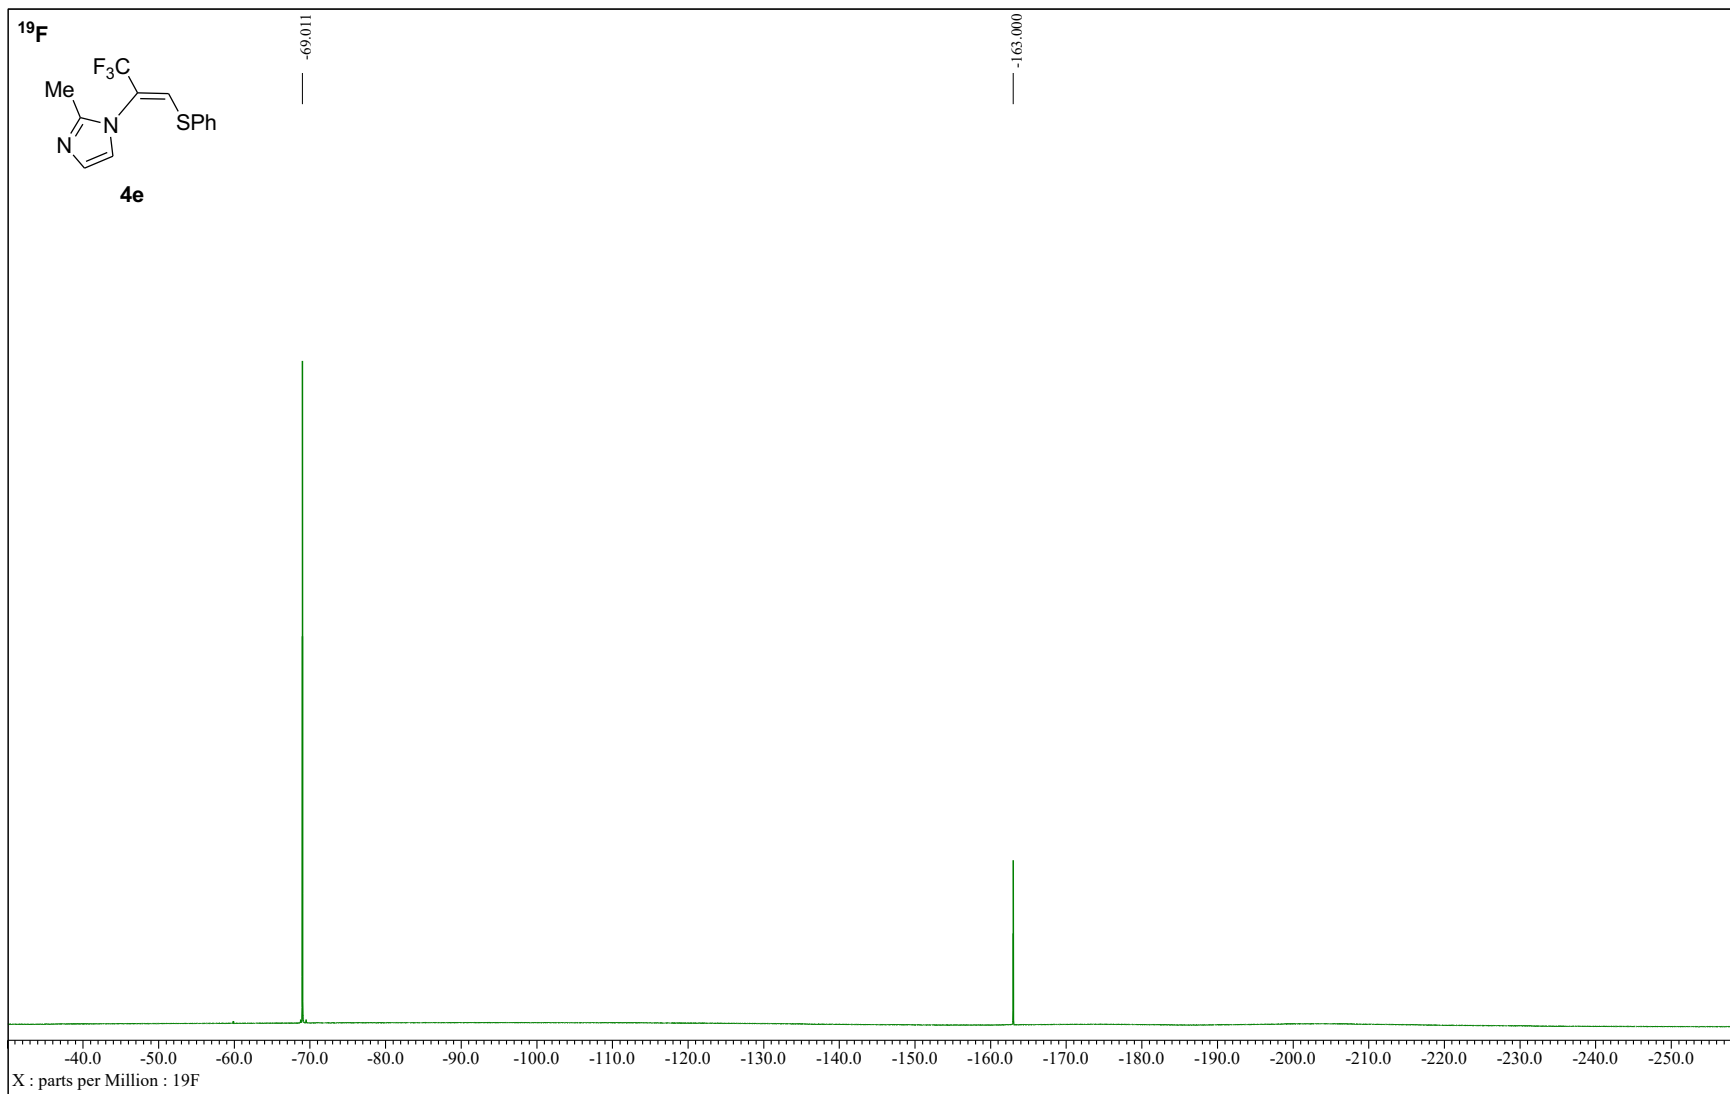

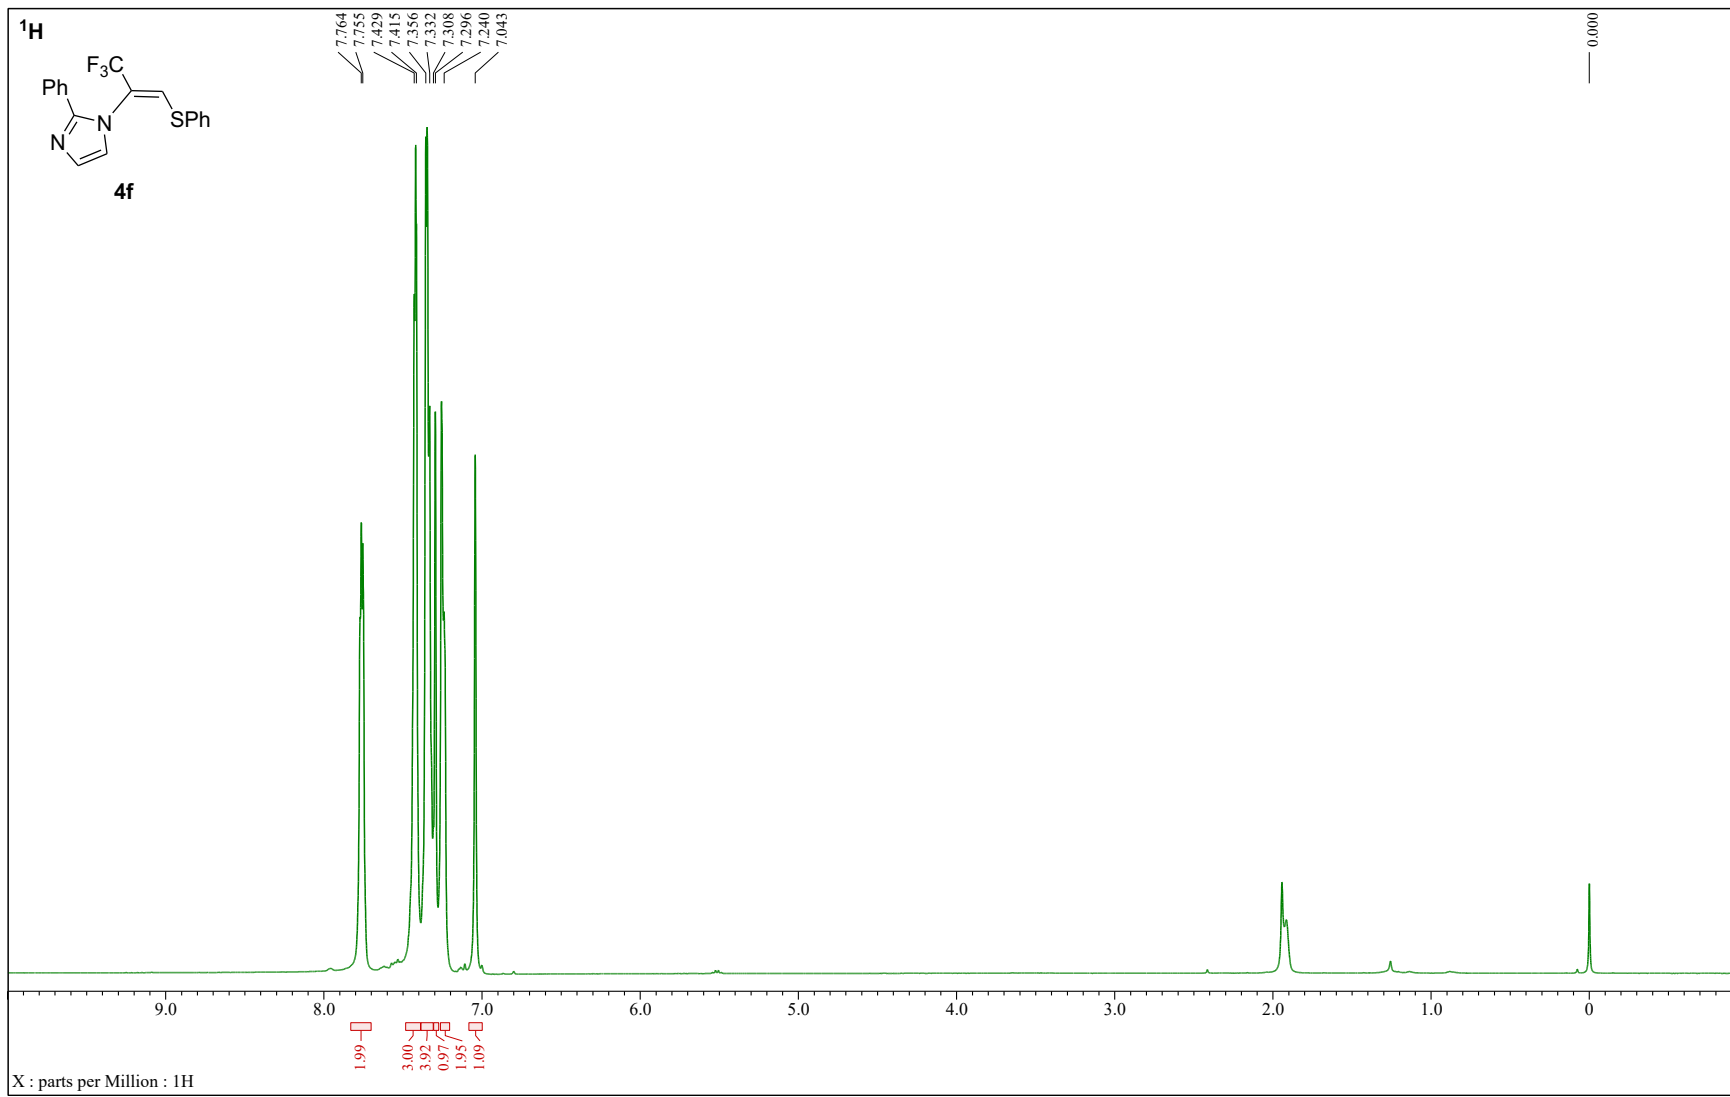

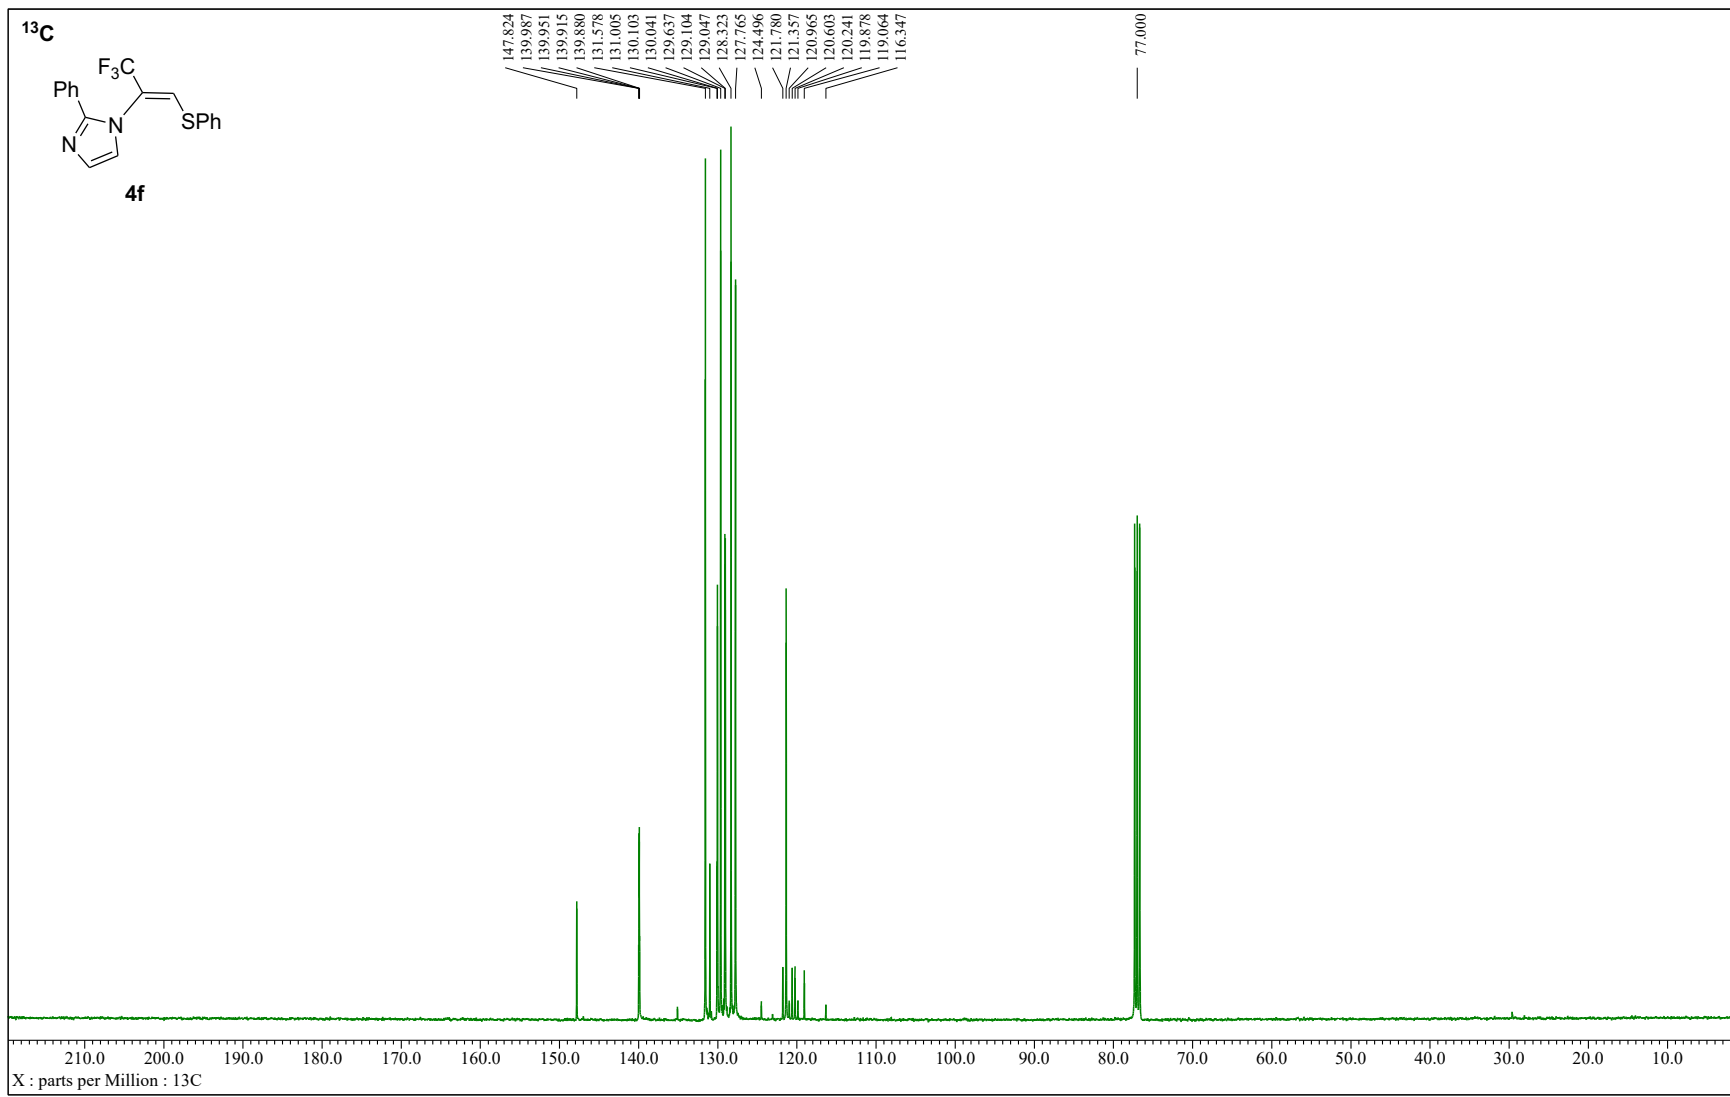

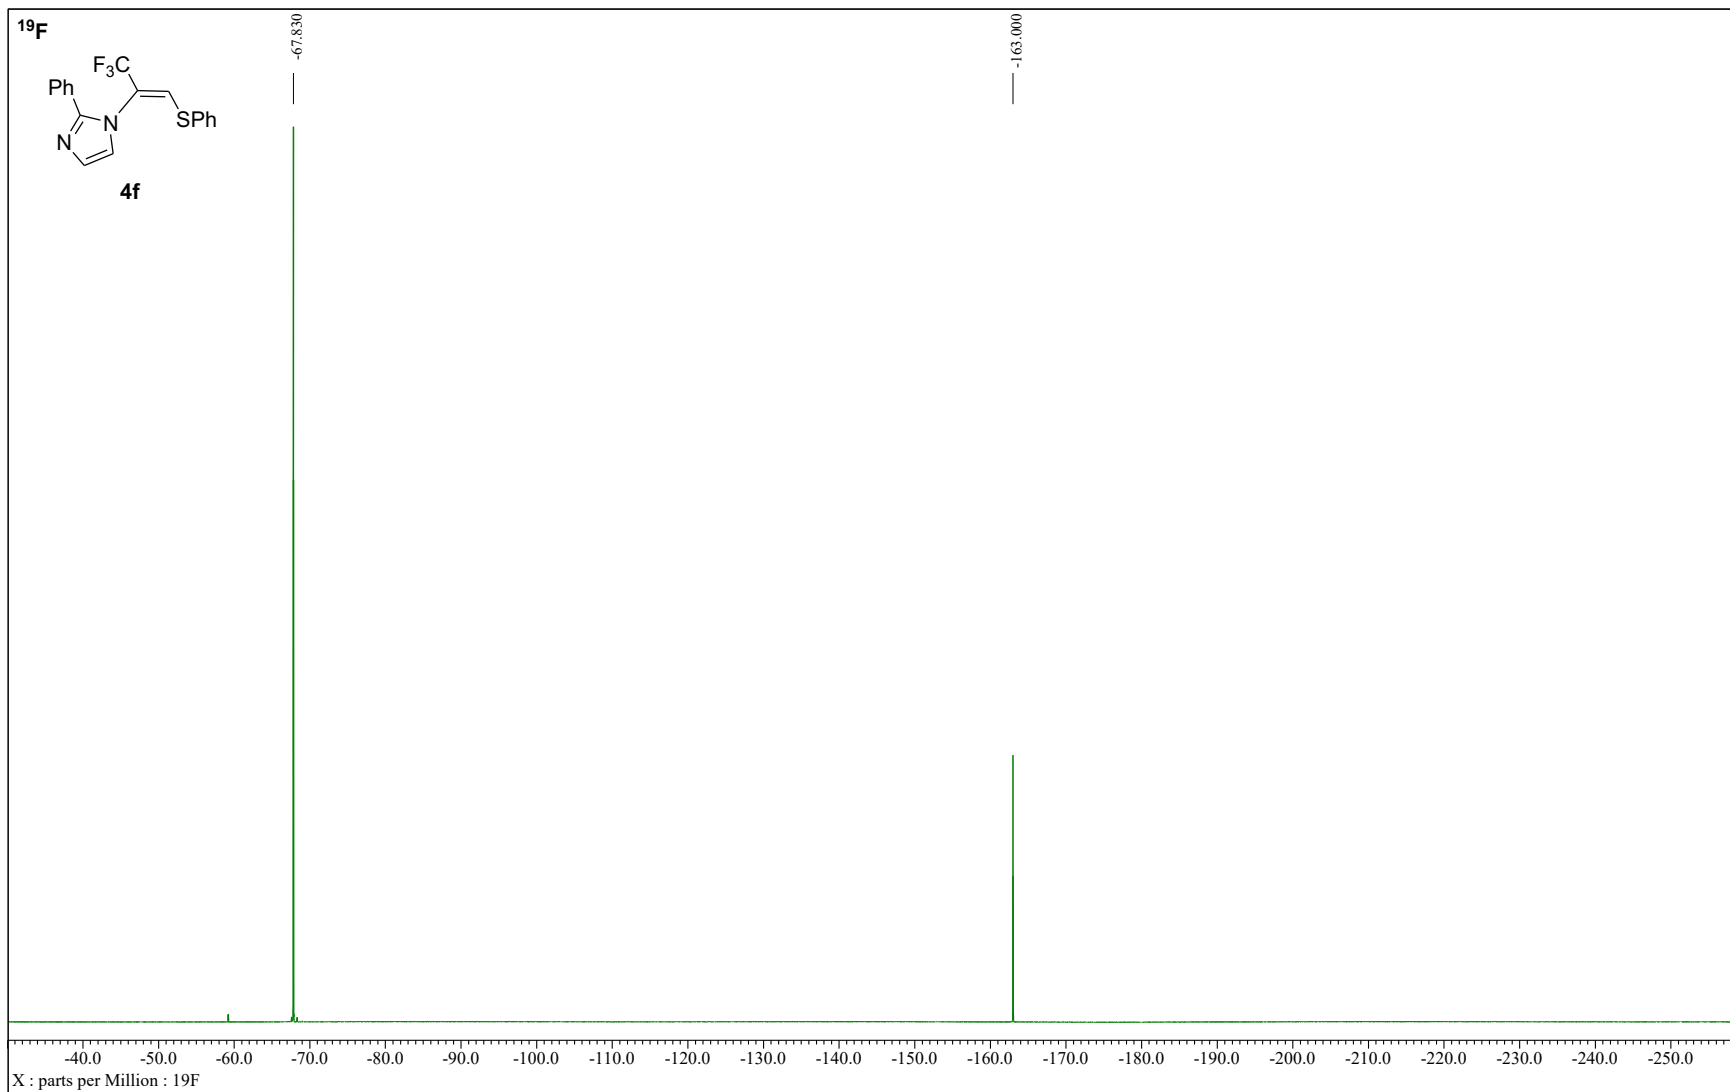

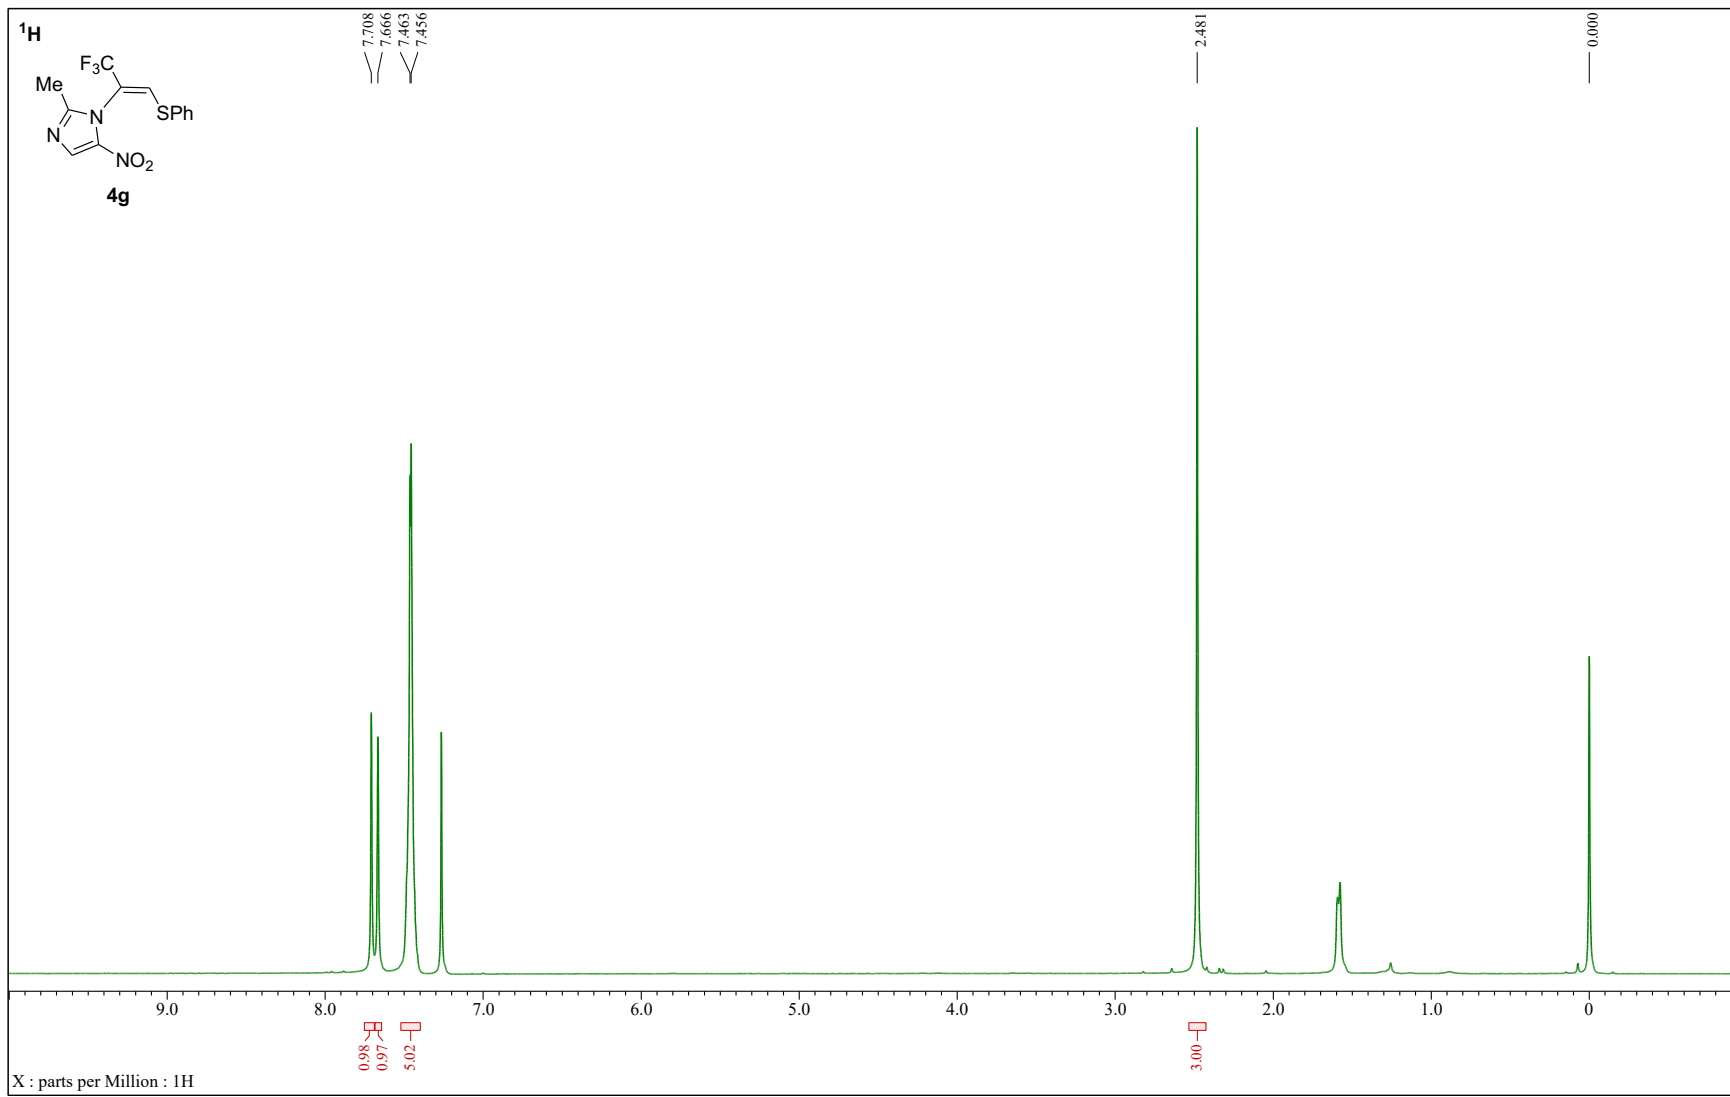



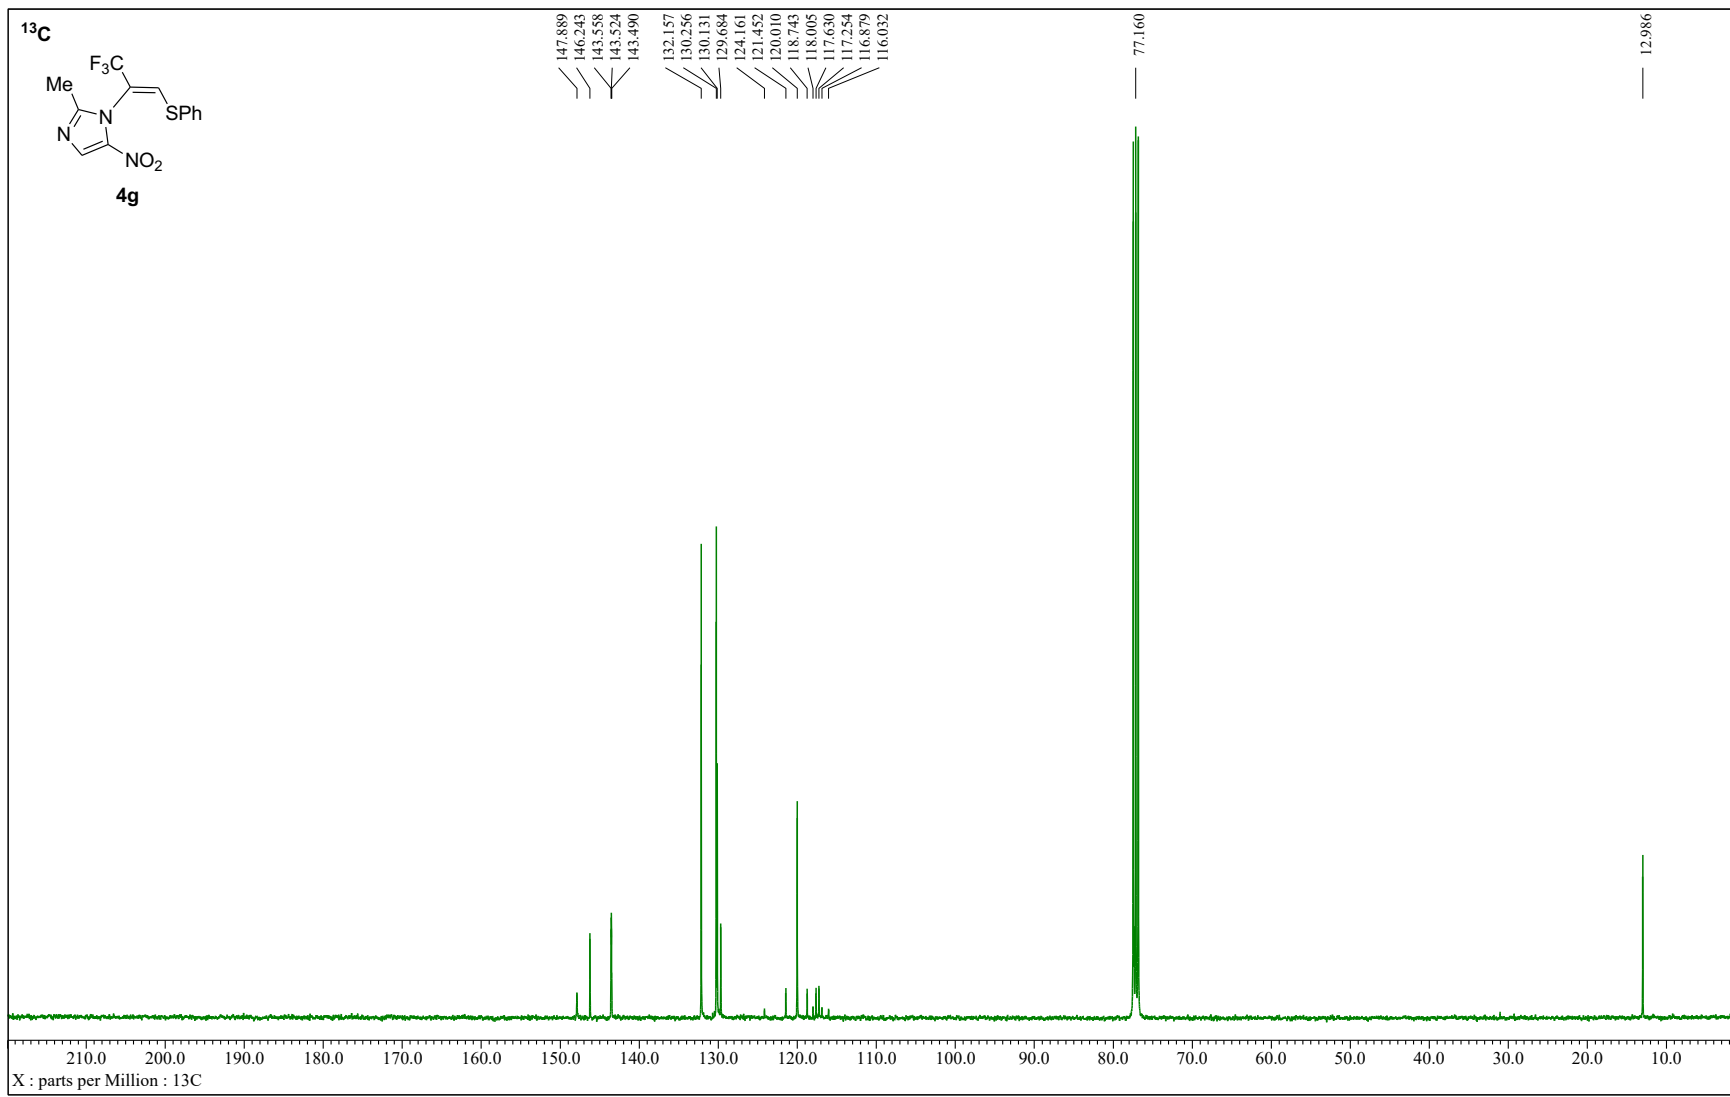

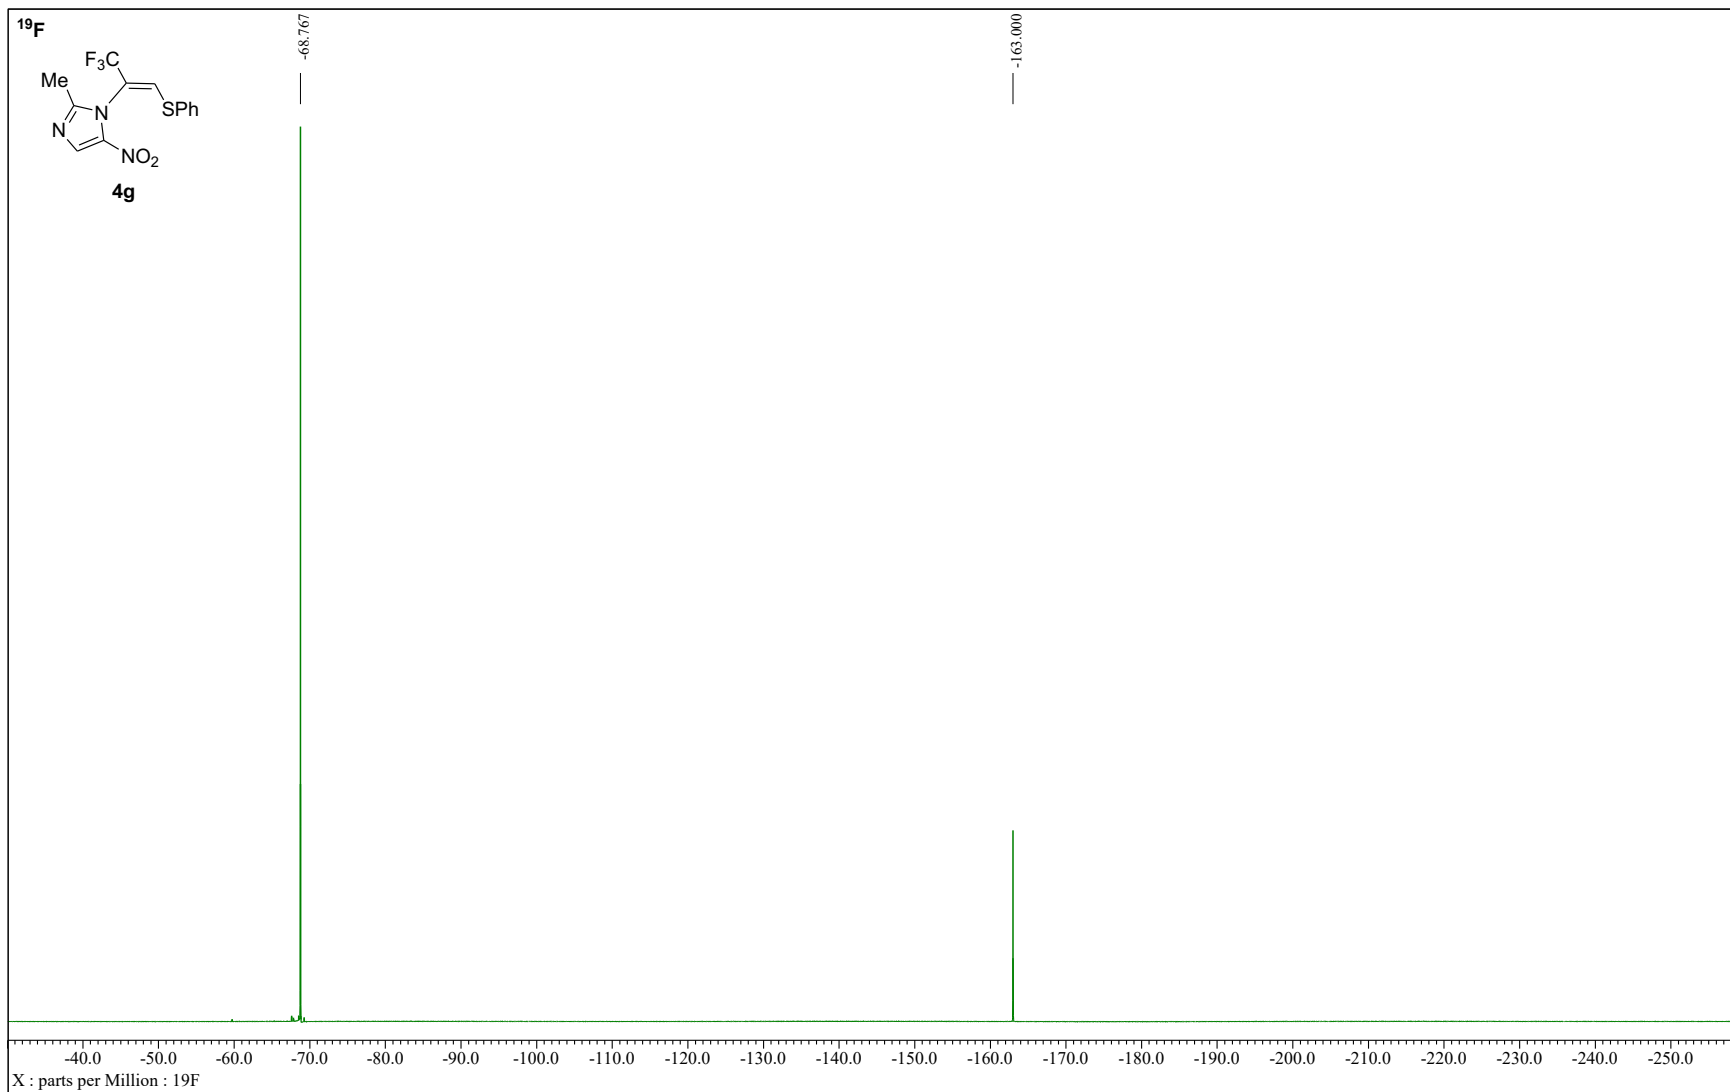

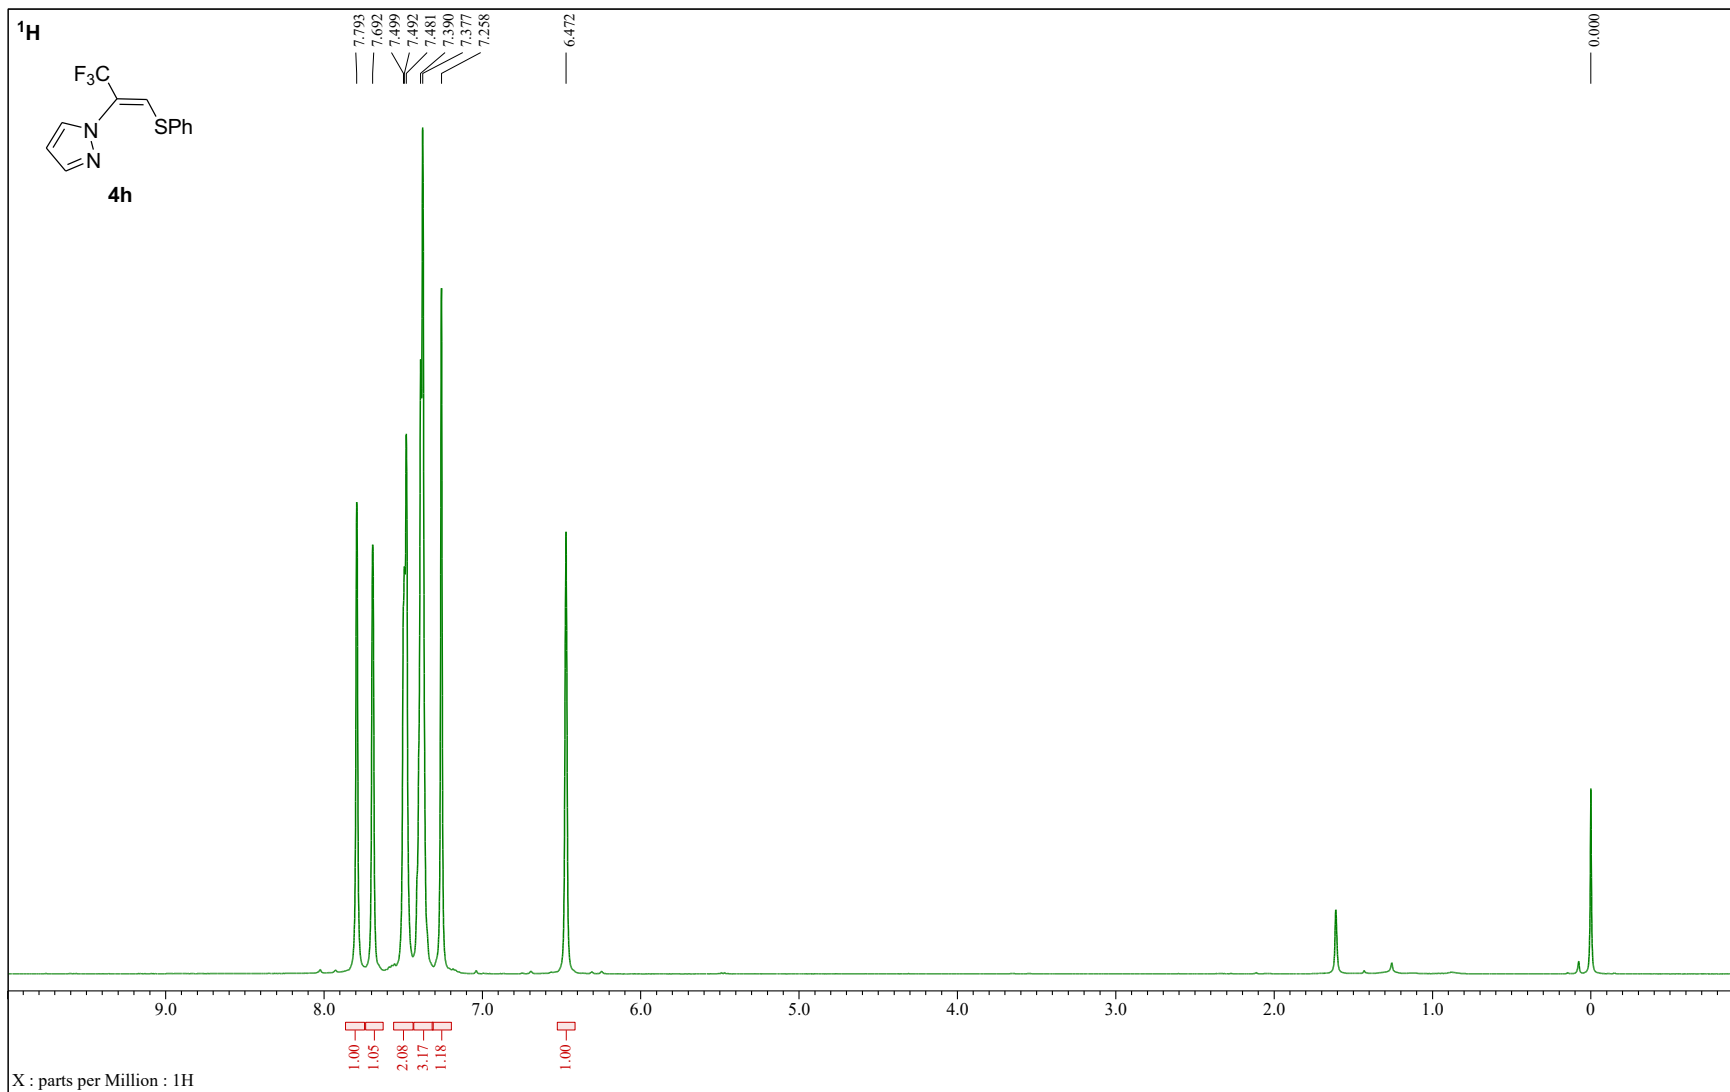

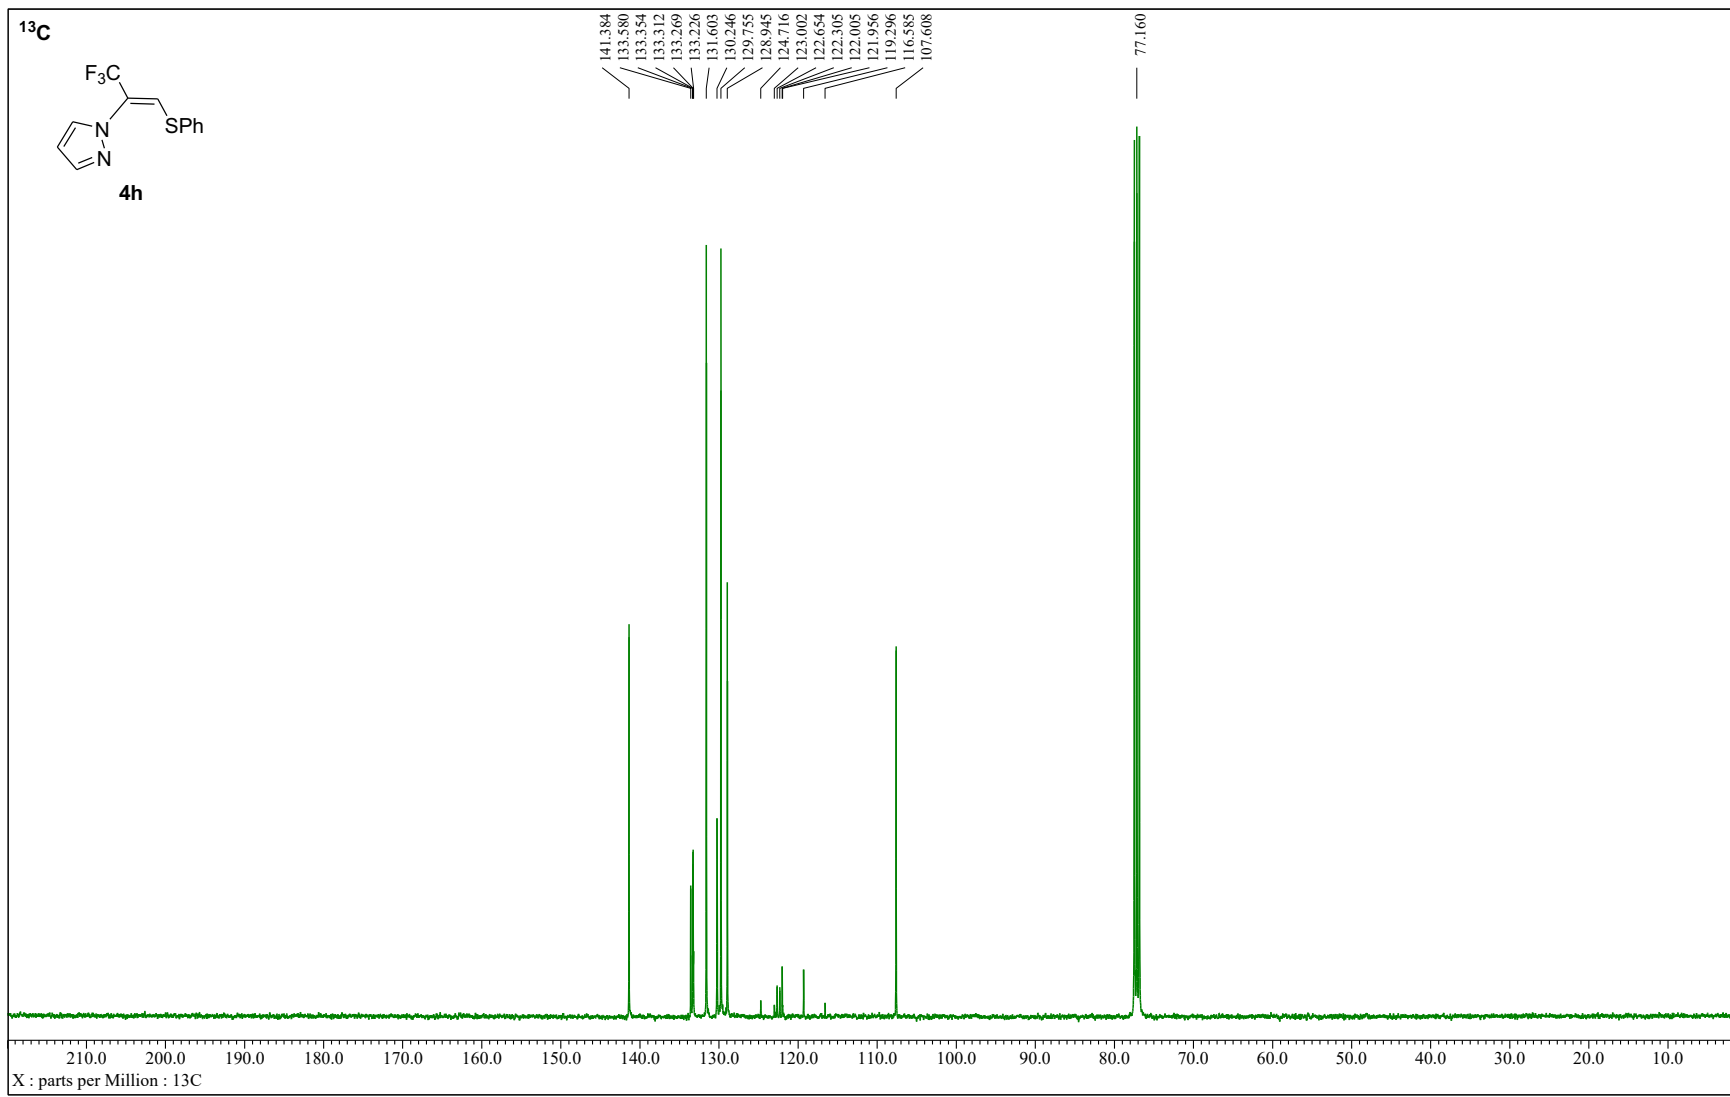

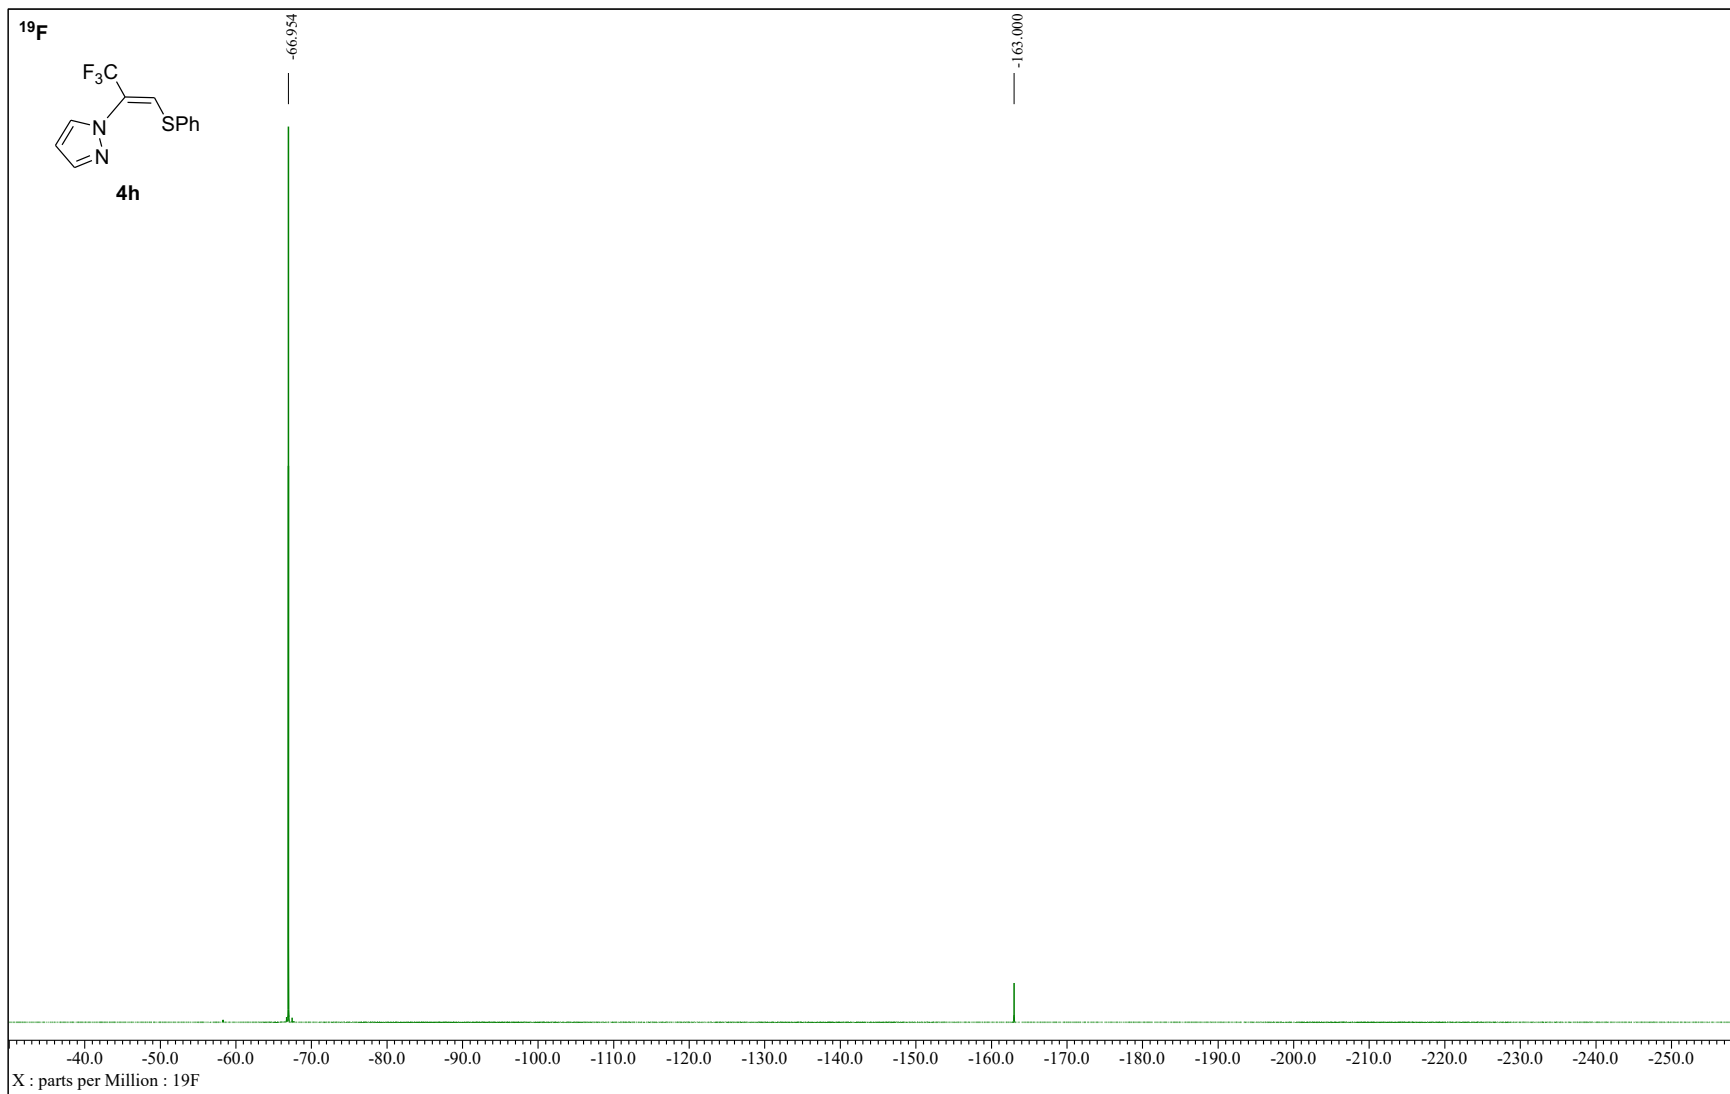

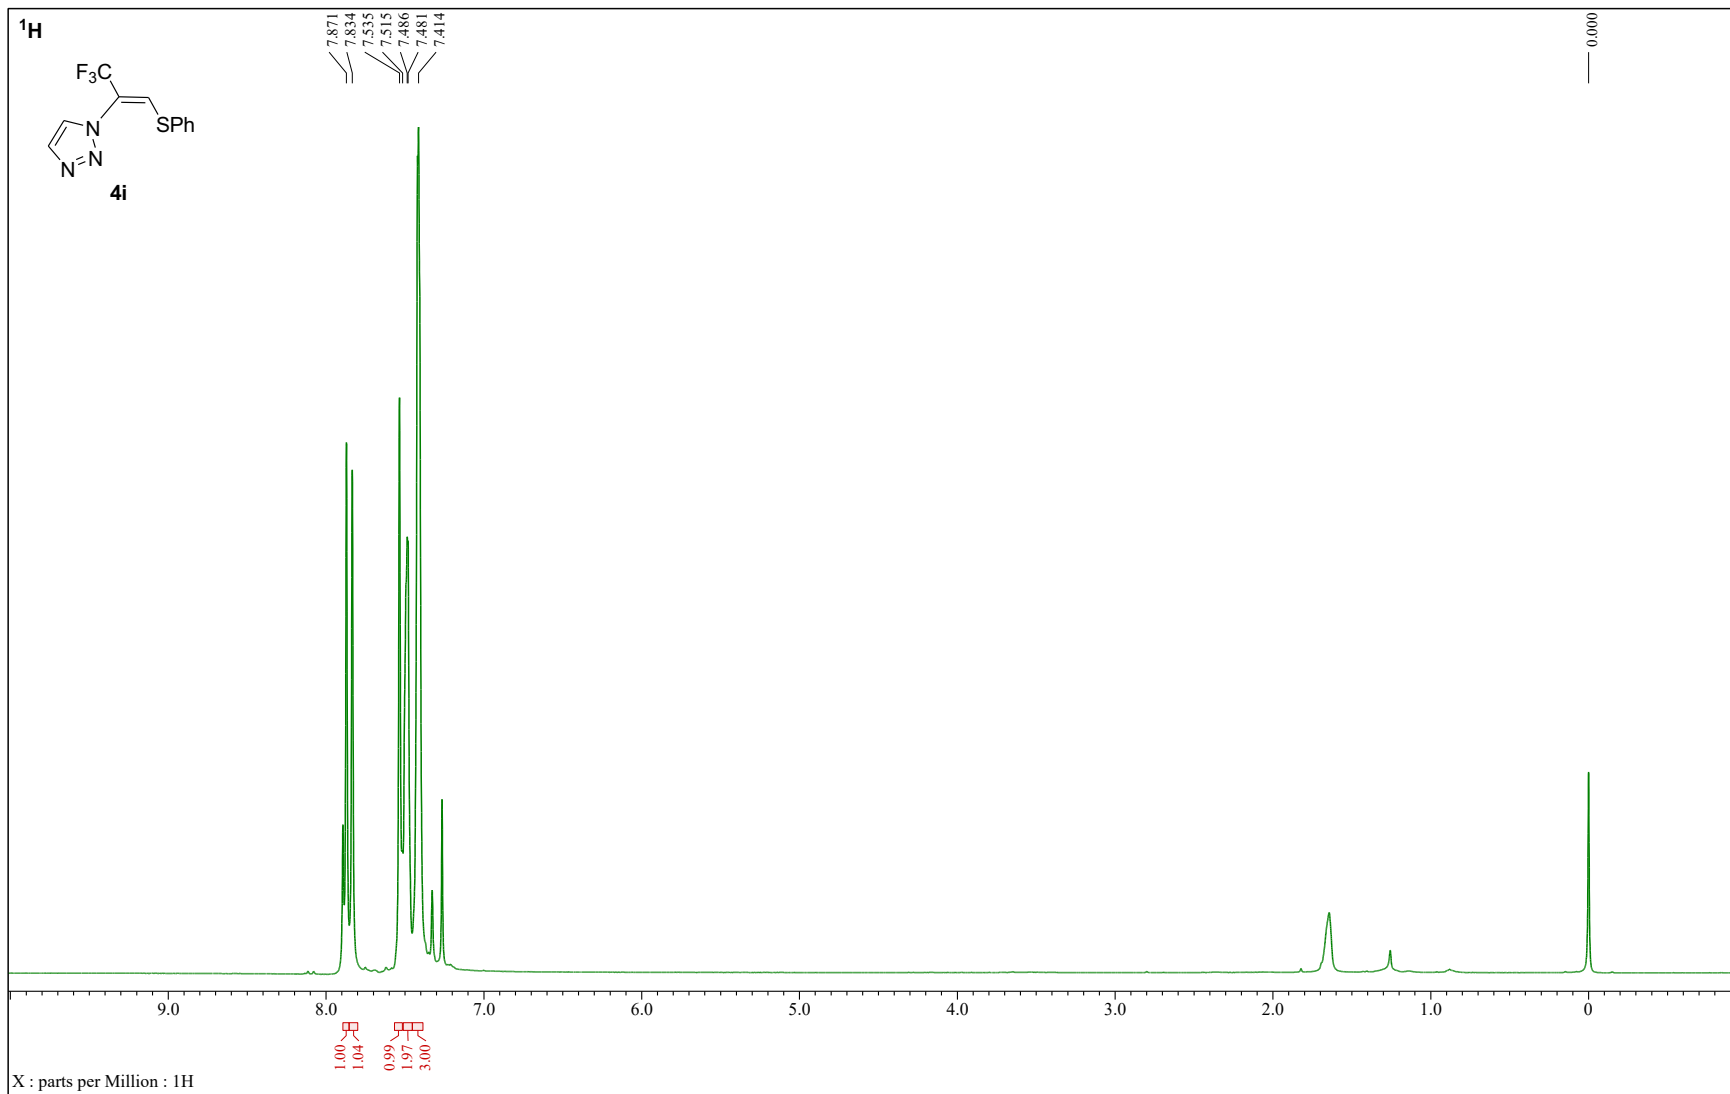

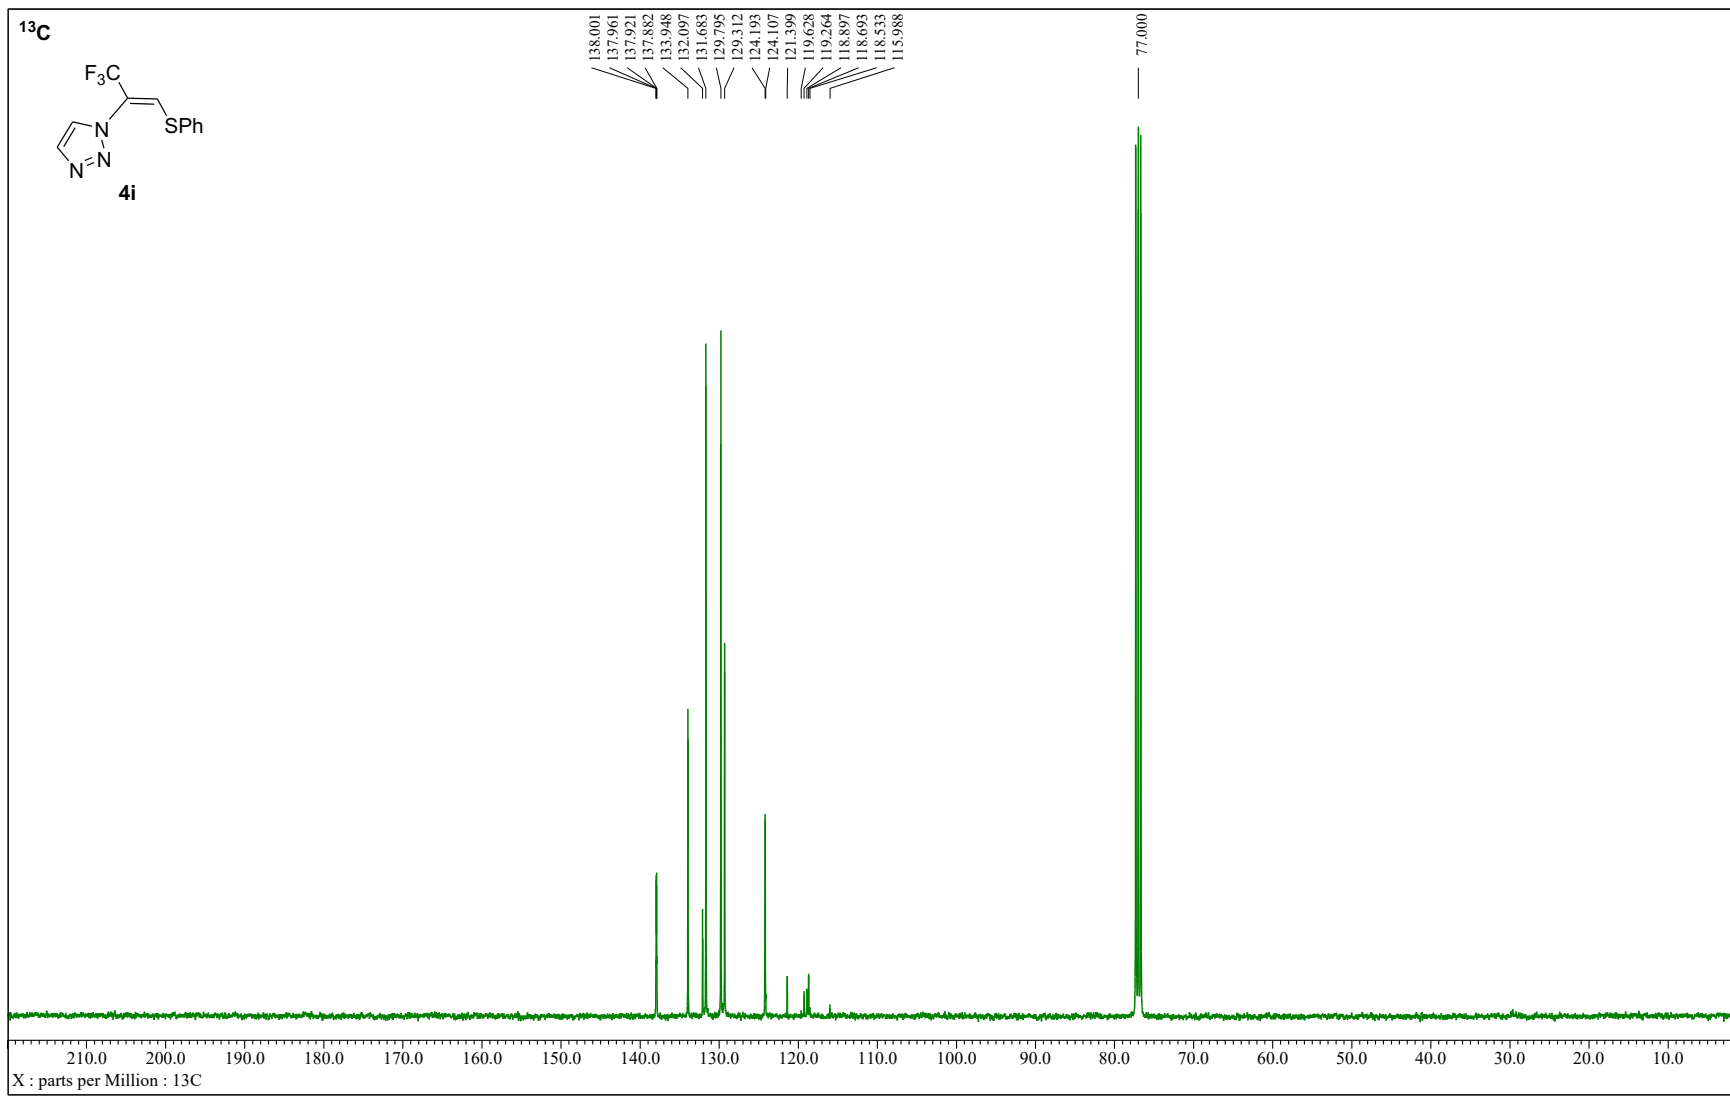

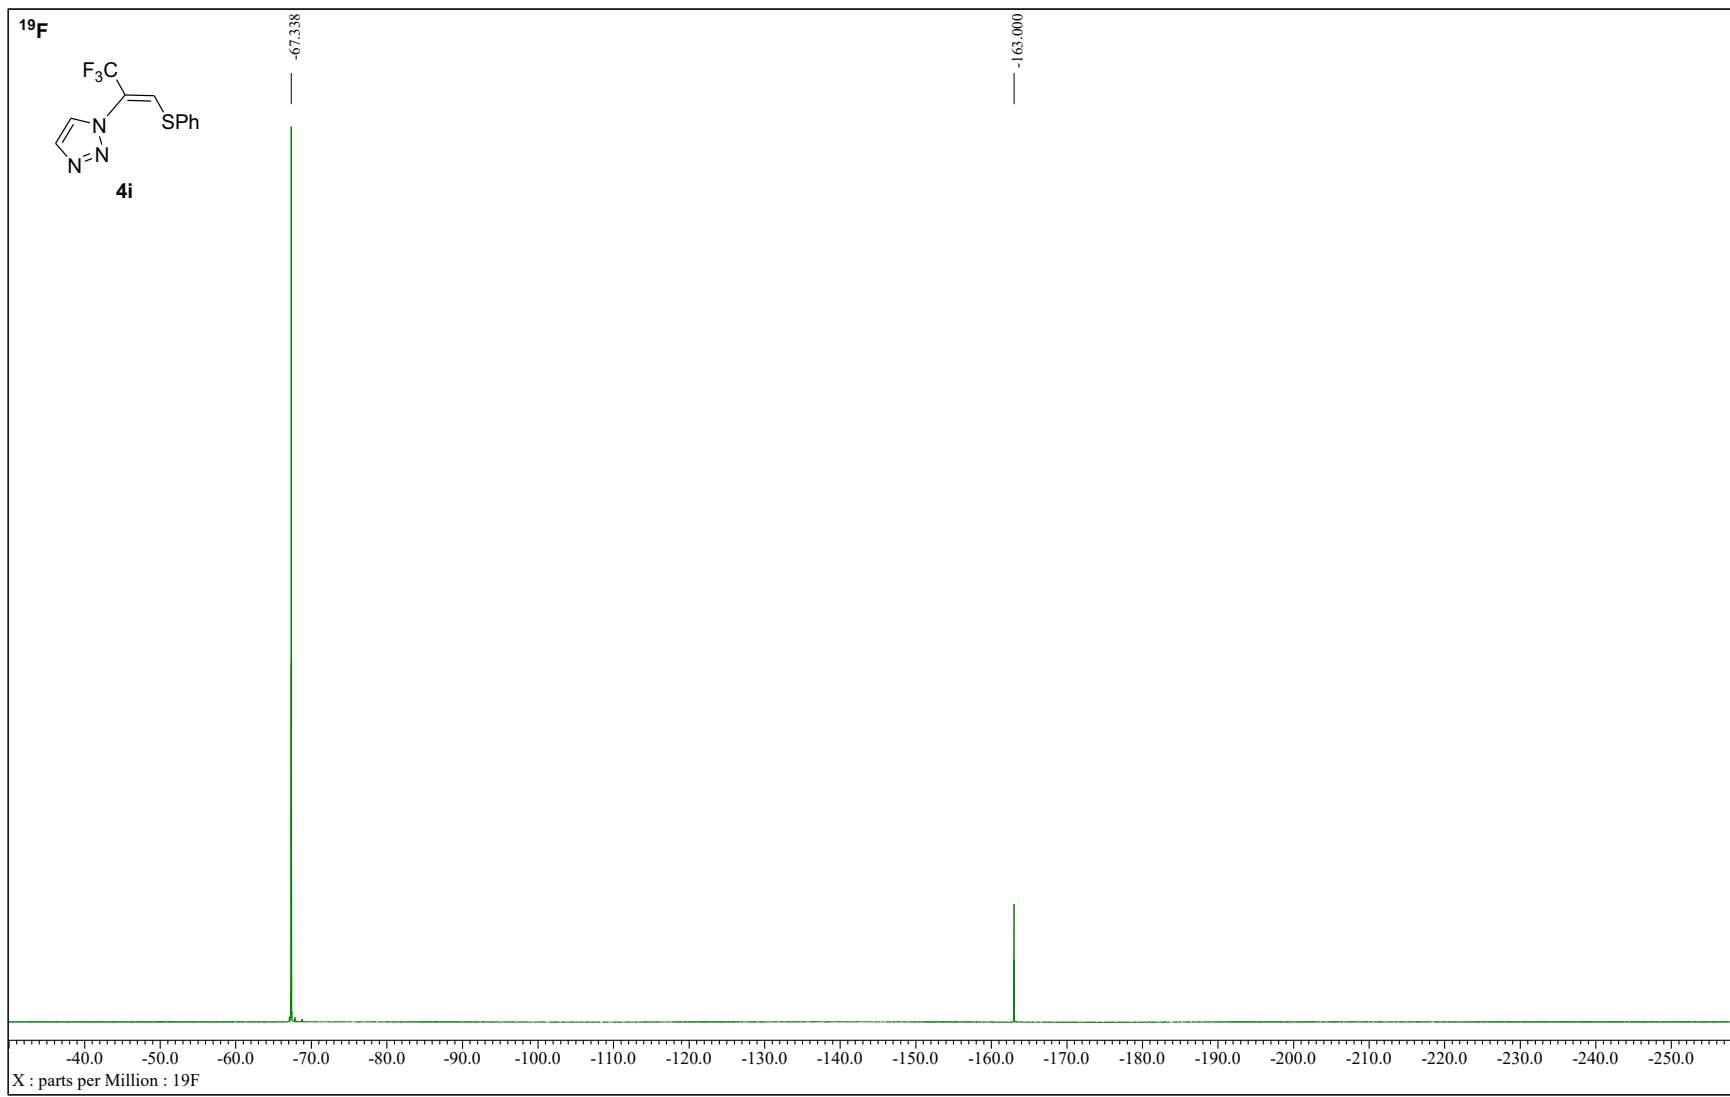



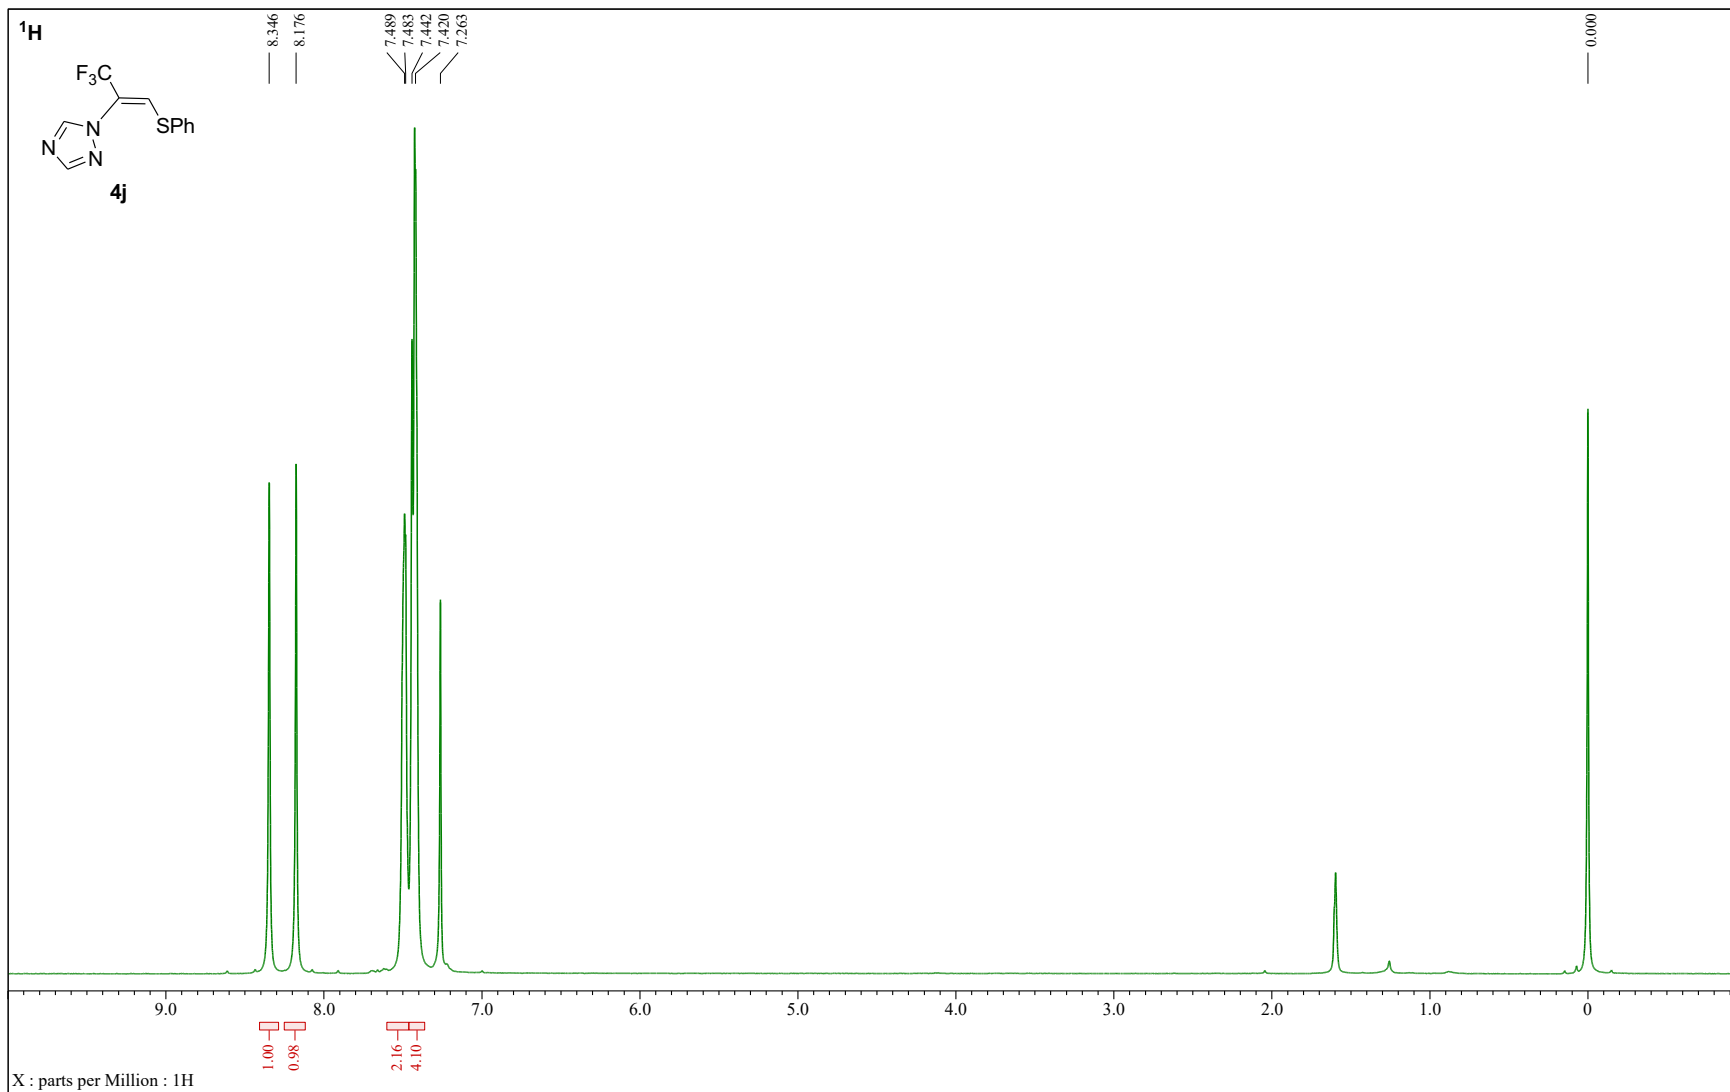

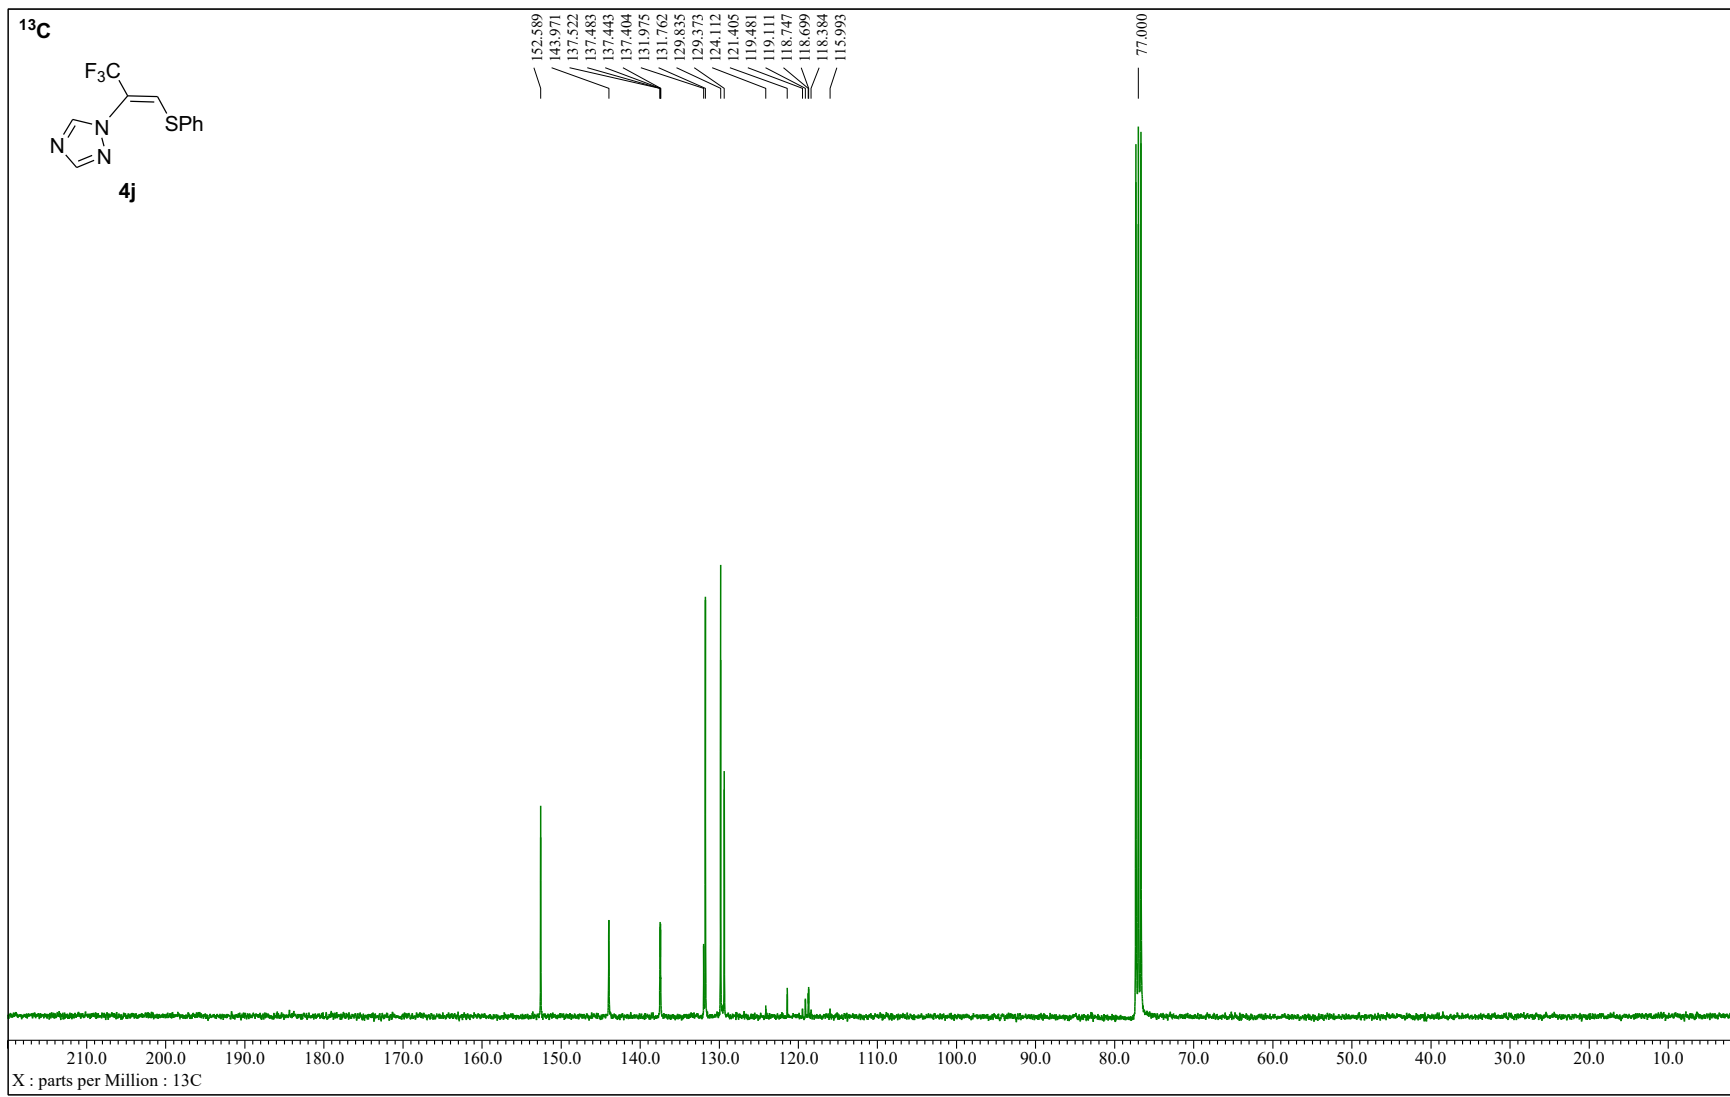

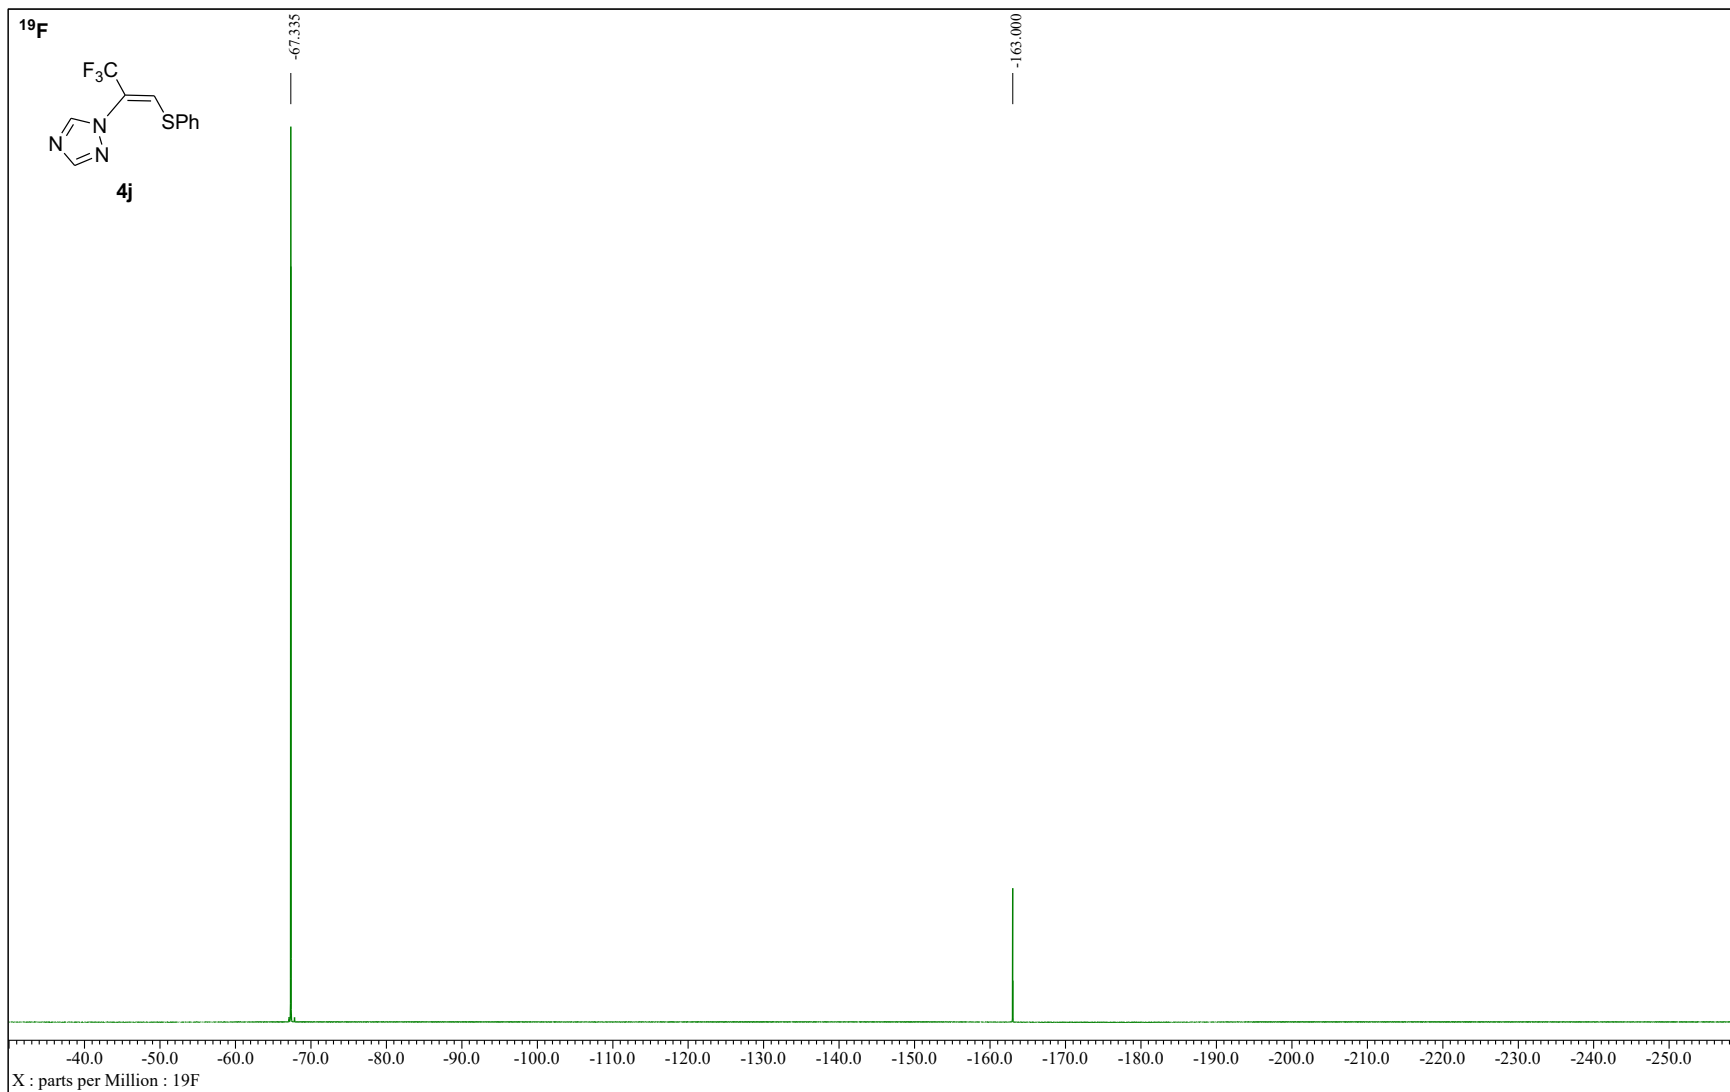

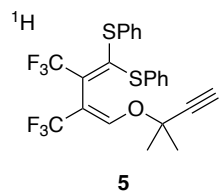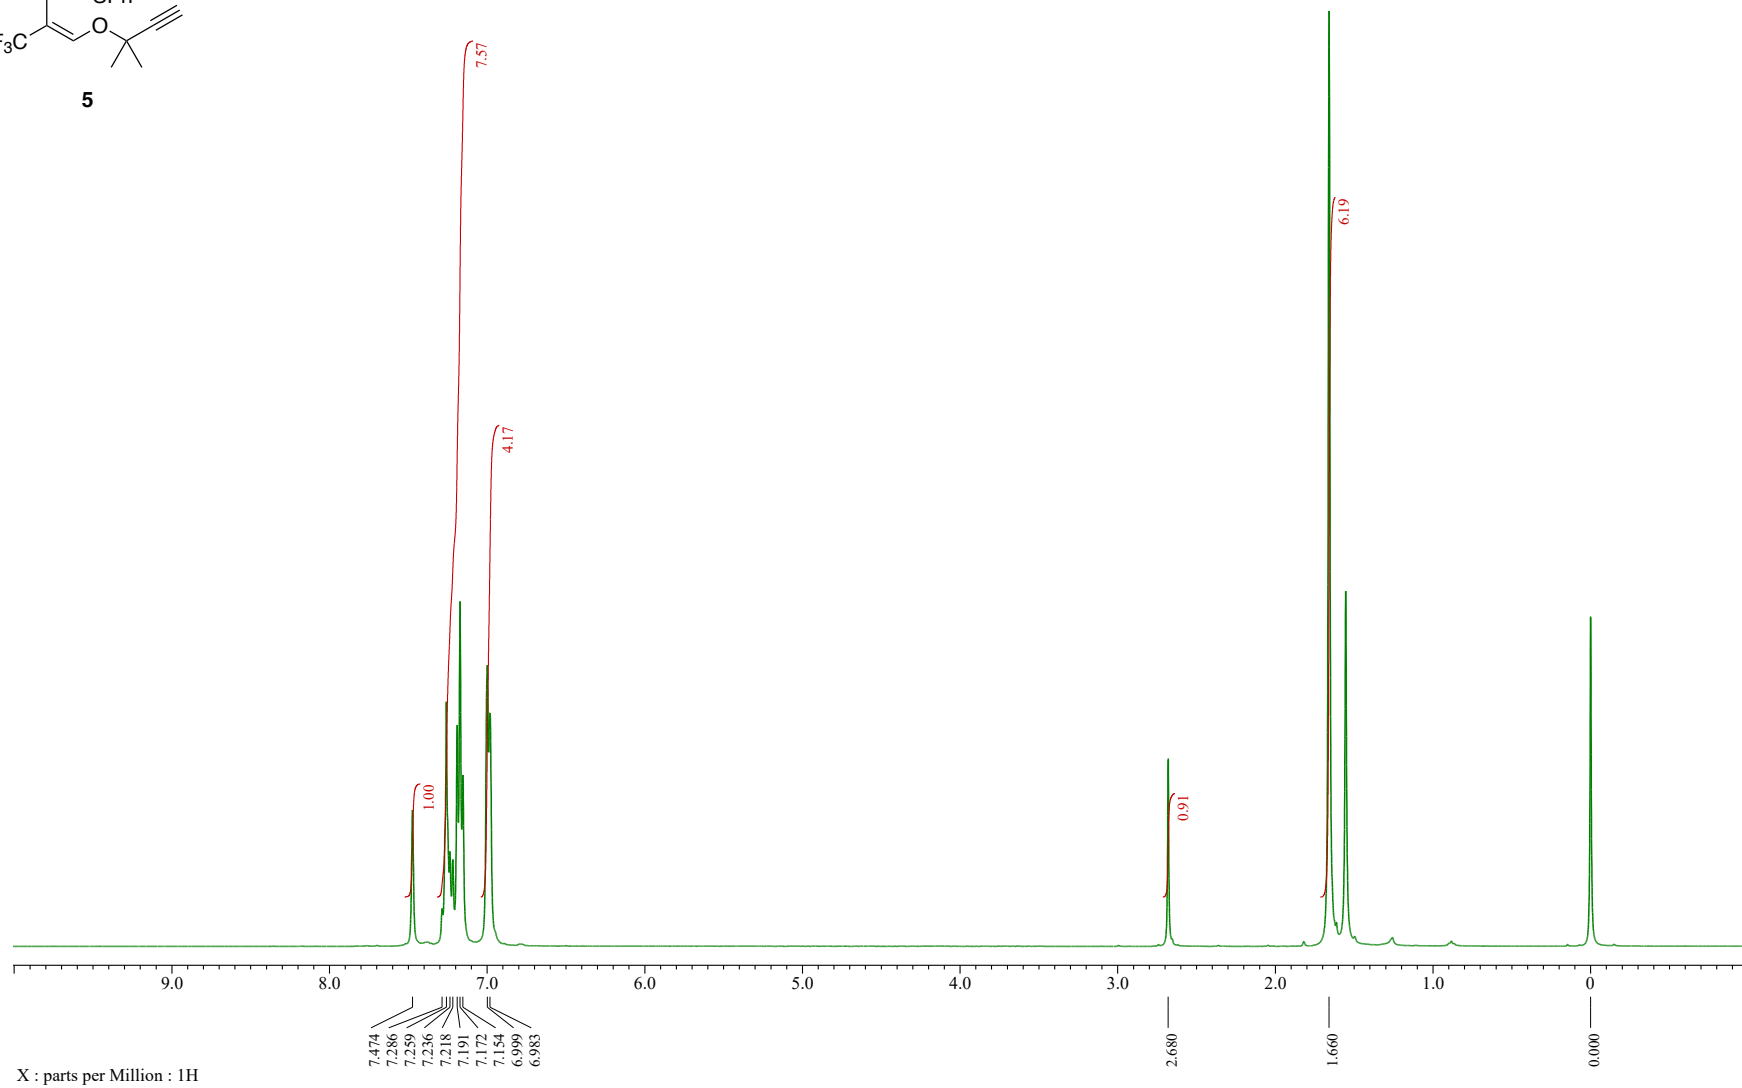

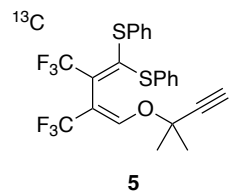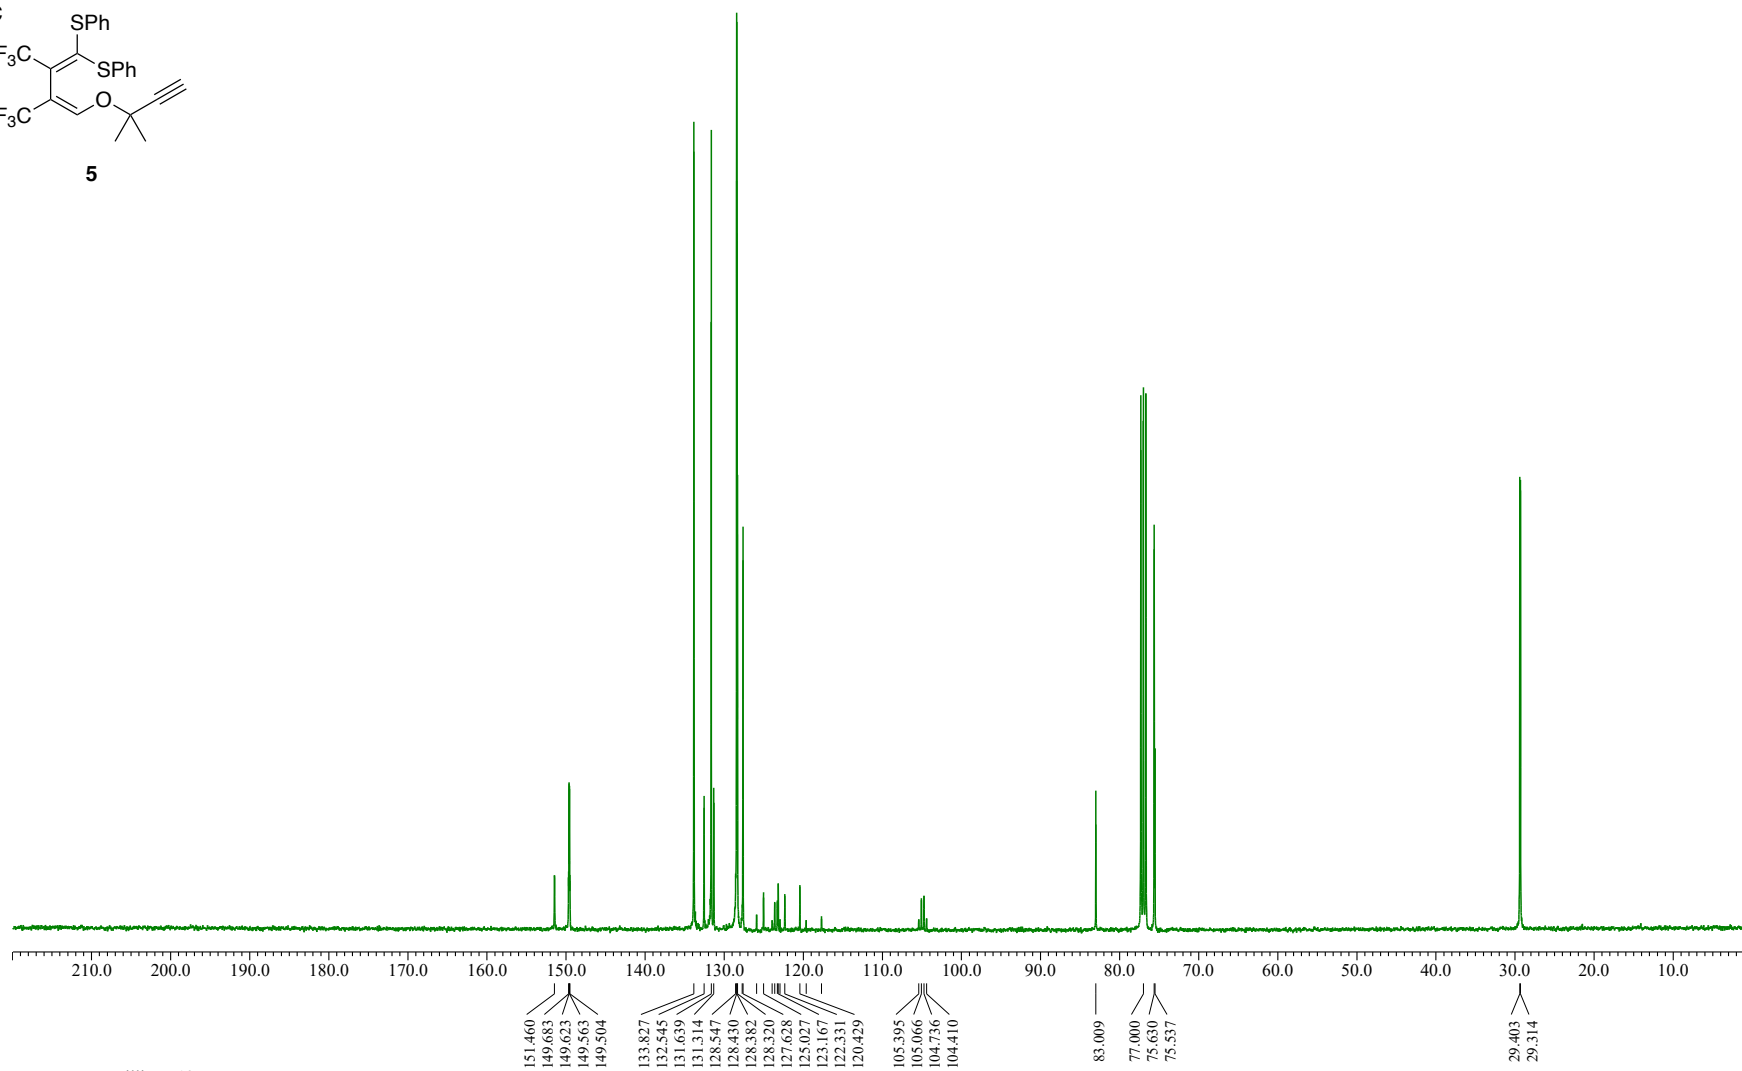

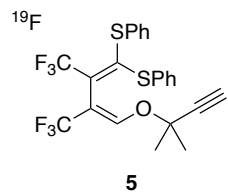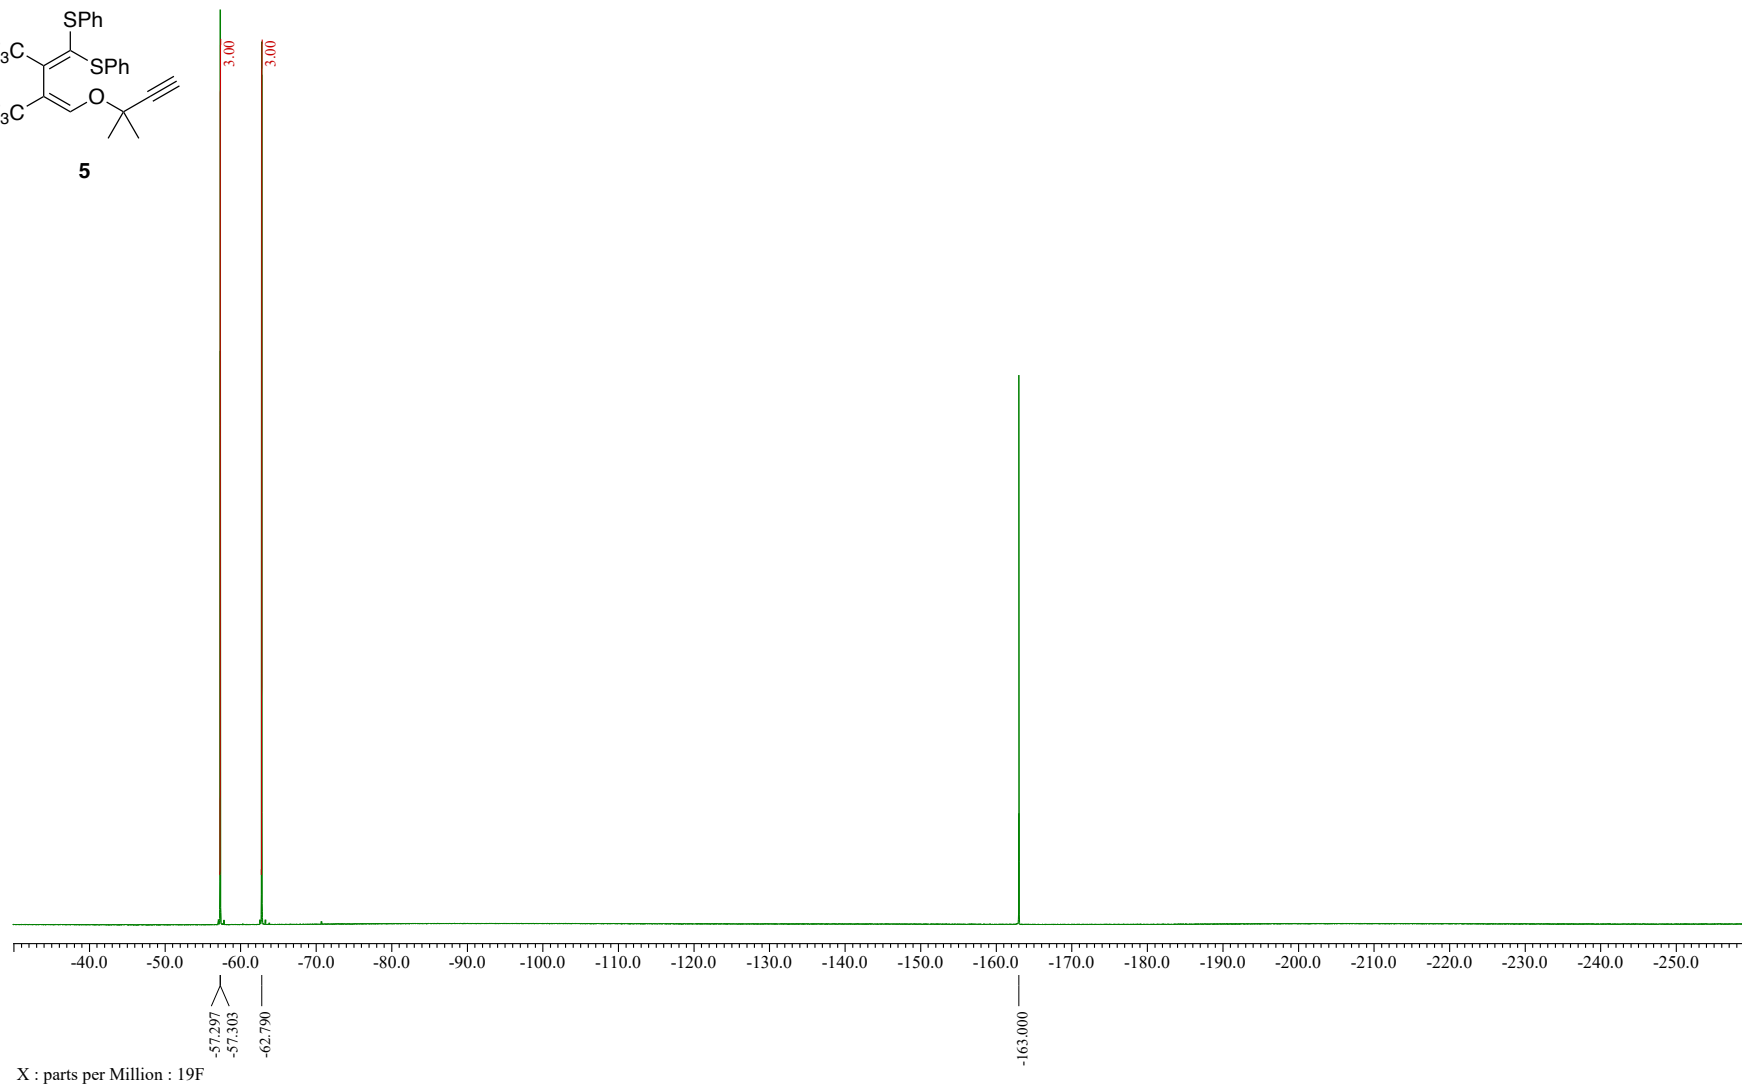

# 1H-19F HOESY

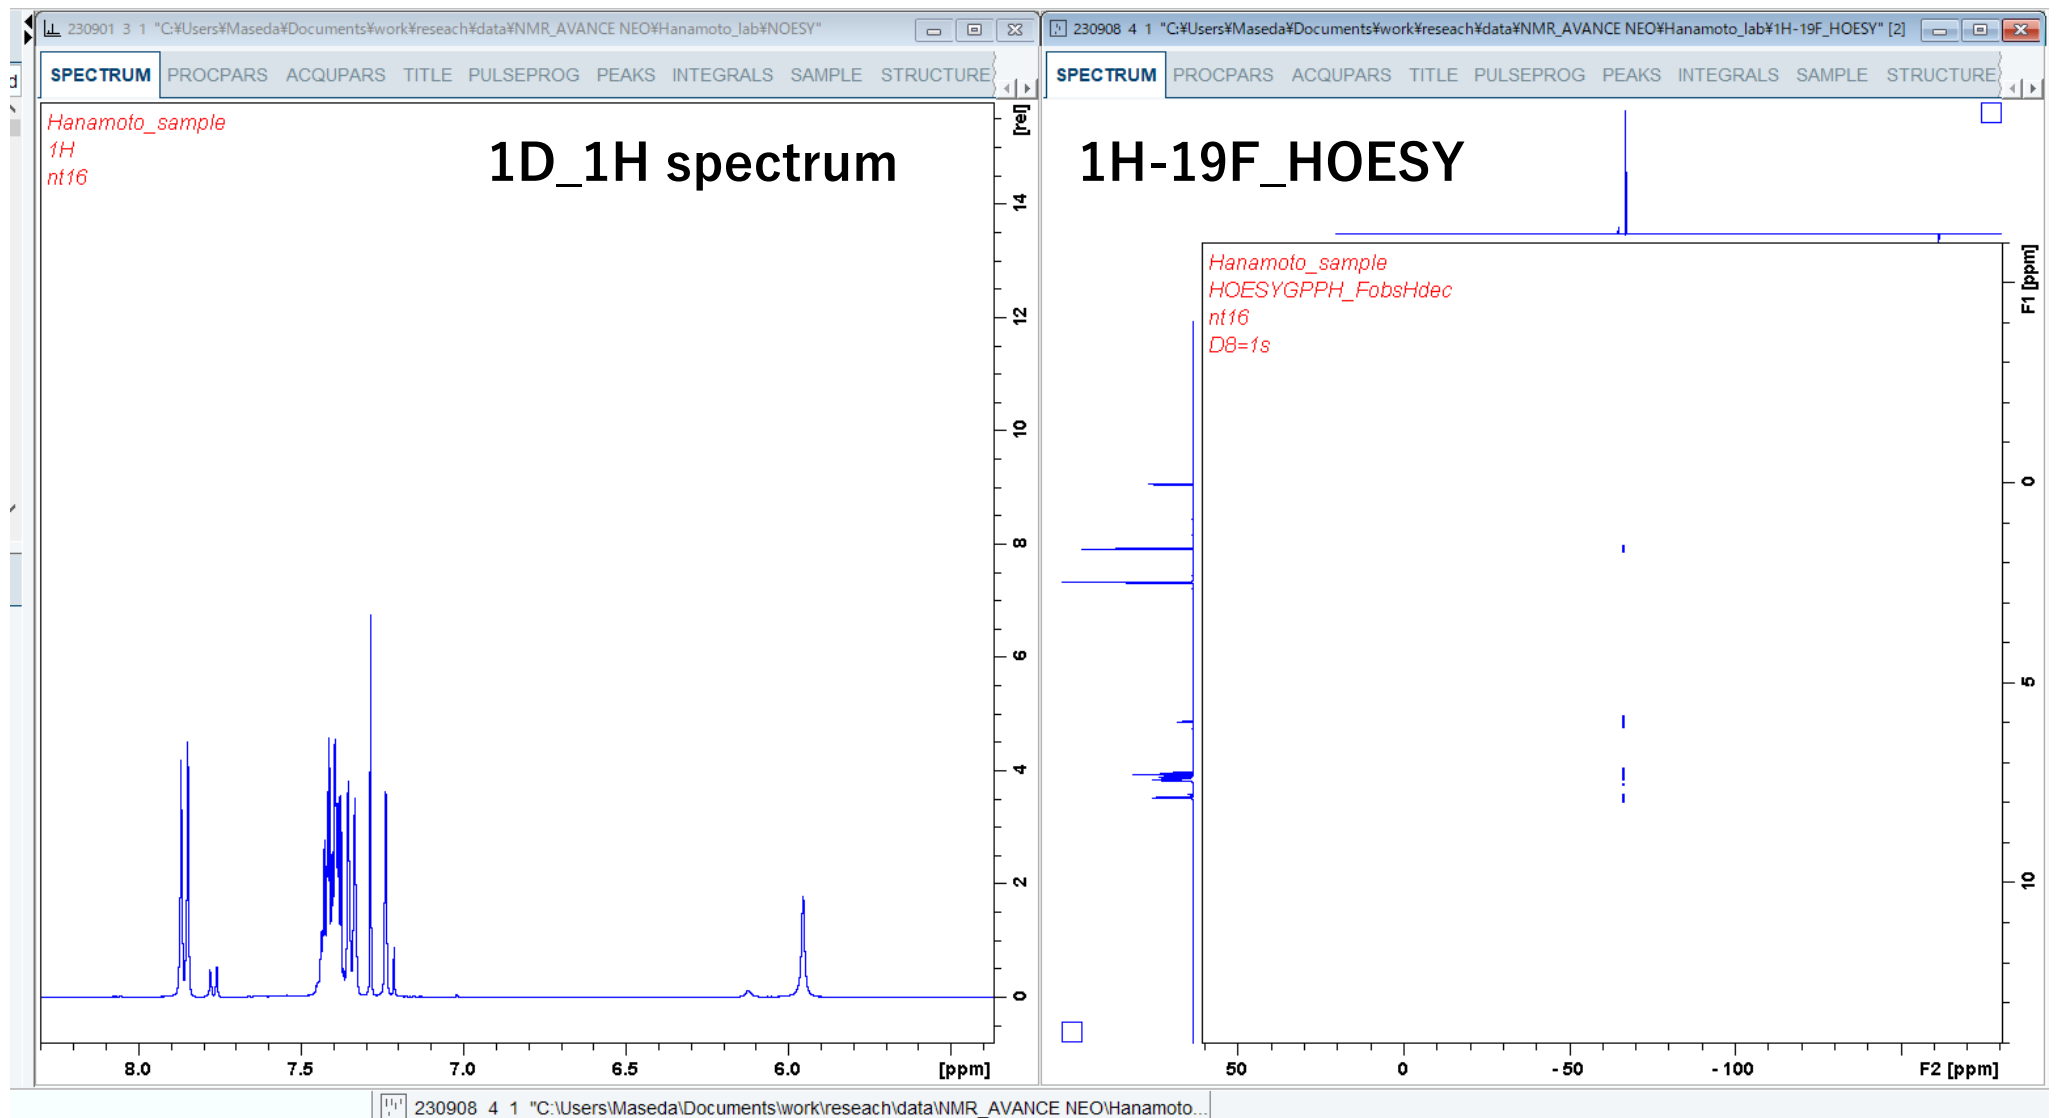

# 1H-19F HOESY

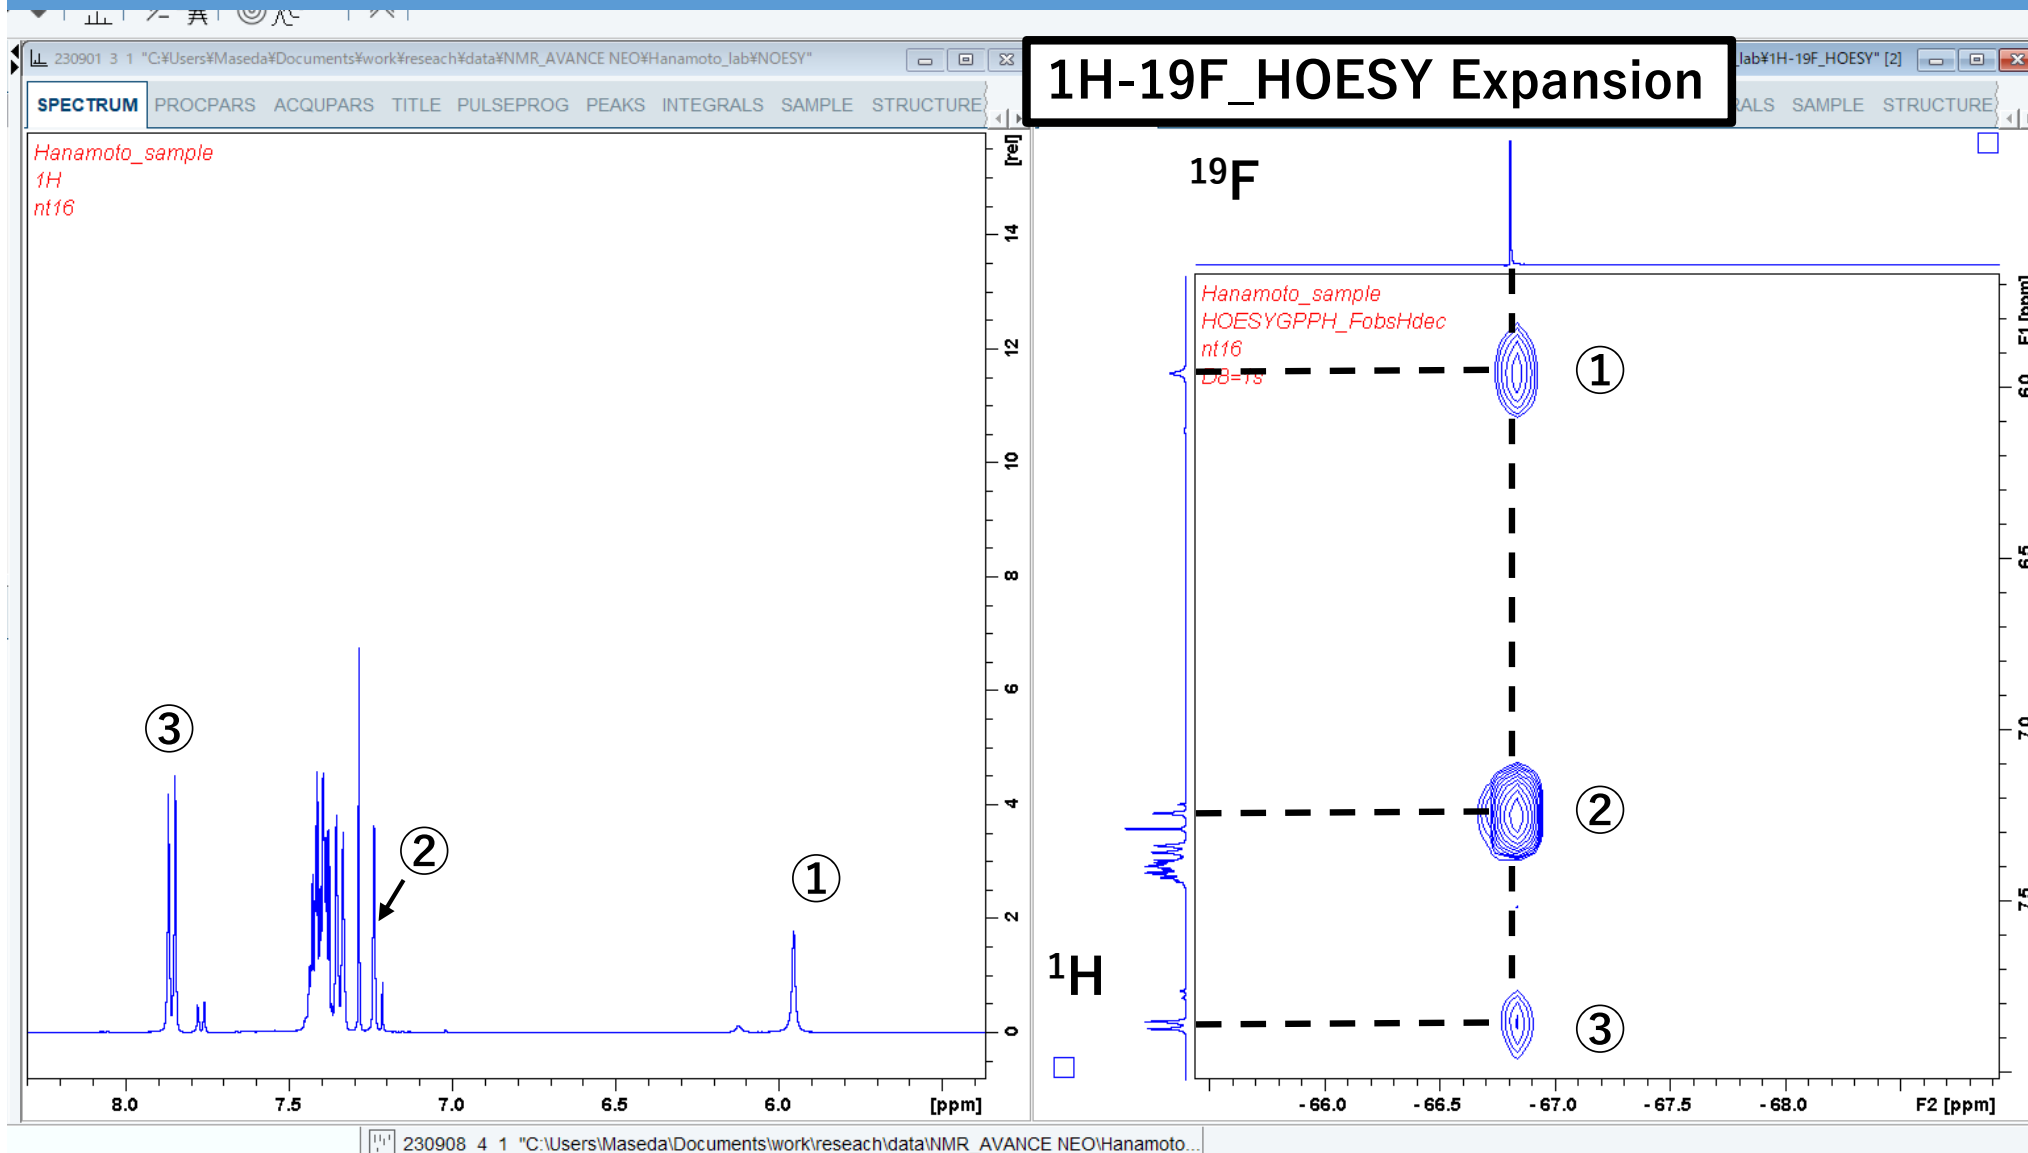

Supplement: d3ob01473h1.pdf [file d3ob01473h1.pdf]
